# Supplementary material for: Translational regulation enhances distinction of cell types in the nervous system
Source: eLife. 2024 Jul 16;12:RP90713. doi: 10.7554/eLife.90713 (PMC11251722; doi:10.7554/eLife.90713)
Supplement: Supplementary file 1. [file elife-90713-supp1.xlsx]

## Sheet: Data
						Riboseq, CDS (TPM)				RNAseq (TPM)			Translational efficiency (CDS/RNA)
Transcript	Gene	CG Number	Transcript_ID	Gene_ID	Length (AA)	Length (bp)	CS (Whole heads)	nSyb-G4 (Neuron)	repo-G4 (glia)	CS (Whole heads)	nSyb-G4 (Neuron)	repo-G4 (glia)	CS (Whole heads)	nSyb-G4 (Neuron)	repo-G4 (glia)
CG10000-RA	CG10000	CG10000	FBtr0085315	FBgn0039596	558	1676	0	0.149055	0.0942999	0.393348	0	0.0269521	0	#DIV/0!	3.4988
AstA-R2-RA	AstA-R2	CG10001	FBtr0085316	FBgn0039595	357	1073	1.12185	4.42357	0.147294	1.24078	1.12623	0.35193	0.90415	3.92777	0.418532
fkh-RB	fkh	CG10002	FBtr0300259	FBgn0000659	510	1532	3.92868	10.5992	1.34113	3.50464	5.54755	1.47631	1.121	1.91061	0.908431
CG10005-RA	CG10005	CG10005	FBtr0082507	FBgn0037972	231	695	0	0.718893	0	0.231543	0	0.0284338	0	#DIV/0!	0
Zip71B-RC	Zip71B	CG10006	FBtr0347146	FBgn0036461	572	1718	5.25501	2.18116	66.1441	3.48291	0.722163	10.4969	1.5088	3.02031	6.30131
Tango9-RA	Tango9	CG10007	FBtr0082508	FBgn0260744	381	1145	96.1947	108.653	70.8104	37.9336	33.362	42.1099	2.53587	3.2568	1.68156
Noa36-RA	Noa36	CG10009	FBtr0085320	FBgn0026400	315	947	6.99115	16.6192	9.67973	15.0454	18.04	17.0197	0.464671	0.921239	0.568735
CG10011-RA	CG10011	CG10011	FBtr0085319	FBgn0039590	2119	6359	5.11106	15.3606	1.93861	3.37889	12.614	2.9507	1.51264	1.21774	0.657001
CG10013-RA	CG10013	CG10013	FBtr0082567	FBgn0038012	465	1397	0	0	0.113133	0.49933	0	0	0	#DIV/0!	#DIV/0!
CG10014-RA	CG10014	CG10014	FBtr0082559	FBgn0038000	421	1265	0	0	0	4.69293	0.0415977	0.26241	0	0	0
drm-RB	drm	CG10016	FBtr0077530	FBgn0024244	81	245	9.82652	7.13758	5.80579	3.33279	0.710374	0.999144	2.94844	10.0476	5.81077
Snm1-RA	Snm1	CG10018	FBtr0078688	FBgn0037338	763	2291	0.525425	1.63563	1.9316	1.50963	2.0008	1.23204	0.348048	0.817488	1.56781
CG10019-RB	CG10019	CG10019	FBtr0273188	FBgn0031568	1104	3314	0.181616	0.527673	0.429215	1.52214	2.20723	1.25652	0.119316	0.239066	0.34159
bowl-RG	bowl	CG10021	FBtr0307028	FBgn0004893	744	2234	5.38831	2.34831	2.97133	3.55941	1.24229	2.86365	1.51382	1.8903	1.0376
Fak-RG	Fak	CG10023	FBtr0301883	FBgn0020440	1200	3602	5.51412	14.079	2.32551	5.98872	8.47078	4.35987	0.92075	1.66207	0.533389
CG10026-RD	CG10026	CG10026	FBtr0332317	FBgn0032785	290	872	13.8045	4.58377	5.43738	12.415	3.61857	14.2683	1.11192	1.26673	0.38108
CG10029-RA	CG10029	CG10029	FBtr0081591	FBgn0037498	410	1232	0	0	0.128285	1.28737	0	0	0	#DIV/0!	#DIV/0!
CG10031-RA	CG10031	CG10031	FBtr0077544	FBgn0031563	129	389	219.707	31.4678	84.9145	45.4918	5.81108	37.6054	4.82961	5.41513	2.25804
for-RC	for	CG10033	FBtr0089307	FBgn0000721	894	2684	21.3033	3.72303	10.7759	20.5436	7.03095	25.493	1.03698	0.52952	0.422701
tj-RB	tj	CG10034	FBtr0301669	FBgn0000964	511	1535	4.70521	12.6942	0.823696	3.73933	7.90578	1.82116	1.2583	1.60569	0.452291
CG10035-RA	CG10035	CG10035	FBtr0082606	FBgn0038028	286	860	0	0	0.183775	1.14234	0.464764	0.082298	0	0	2.23304
otp-RC	otp	CG10036	FBtr0110772	FBgn0015524	271	815	0	4.59783	0.193922	1.83561	9.39303	0.954335	0	0.489494	0.203202
vvl-RD	vvl	CG10037	FBtr0345911	FBgn0086680	427	1283	11.2588	11.8774	32.3977	21.3251	14.5149	23.1294	0.527958	0.818294	1.40071
CG10038-RB	CG10038	CG10038	FBtr0082614	FBgn0038013	309	929	9.7181	12.9076	10.888	8.18567	5.94898	7.00121	1.18721	2.16971	1.55516
rho-RA	rho	CG1004	FBtr0072694	FBgn0004635	355	1067	9.58937	6.55561	106.648	10.757	5.37048	30.7404	0.891458	1.22067	3.46932
MBD-R2-RB	MBD-R2	CG10042	FBtr0082611	FBgn0038016	1169	3509	7.71854	13.8826	9.63864	5.14946	12.9955	7.80994	1.4989	1.06826	1.23415
RtGEF-RB	RtGEF	CG10043	FBtr0081357	FBgn0015803	687	2063	3.50097	2.30077	24.362	5.43237	4.99584	11.4171	0.644463	0.460538	2.13382
GstD1-RA	GstD1	CG10045	FBtr0082607	FBgn0001149	209	629	594.219	210.099	1229.45	215.126	48.2354	432.354	2.76219	4.3557	2.84361
Syt4-RA	Syt4	CG10047	FBtr0081578	FBgn0028400	474	1424	143.706	428.055	7.21421	40.3062	112.256	27.1619	3.56535	3.8132	0.2656
CG10050-RA	CG10050	CG10050	FBtr0081577	FBgn0037492	251	755	1.59437	1.65441	1.04667	1.2194	2.11485	0.997809	1.30751	0.782281	1.04896
CG10051-RA	CG10051	CG10051	FBtr0086521	FBgn0034437	866	2600	0	0	0	0.112319	0	0.0361243	0	#DIV/0!	0
Rx-RB	Rx	CG10052	FBtr0342783	FBgn0020617	904	2714	0.443533	2.76141	0.116468	0.822484	3.25104	0.373402	0.53926	0.849391	0.31191
CG10053-RA	CG10053	CG10053	FBtr0081576	FBgn0037490	266	800	0	4.99631	1.58047	6.09657	10.6253	4.33377	0	0.470228	0.364686
CG10055-RA	CG10055	CG10055	FBtr0081605	FBgn0037482	608	1826	3.29613	6.29327	4.15457	8.00445	9.01512	7.66248	0.411788	0.698079	0.542196
MAGE-RA	MAGE	CG10059	FBtr0081606	FBgn0037481	232	698	11.2097	15.0319	10.4157	4.99247	3.01274	3.60523	2.24532	4.98944	2.88905
Gﾎｱi-RA	Gﾎｱi	CG10060	FBtr0076934	FBgn0001104	355	1067	31.0244	7.49212	93.169	14.3105	4.26423	28.2077	2.16795	1.75697	3.30296
Sas-4-RA	Sas-4	CG10061	FBtr0081569	FBgn0011020	901	2705	1.11252	2.12412	0.525848	1.33147	2.3897	1.50952	0.835557	0.888865	0.348355
CG10062-RD	CG10062	CG10062	FBtr0334006	FBgn0034439	819	2459	14.1963	3.55573	110.742	2.63094	0.506103	6.04202	5.3959	7.02571	18.3286
CG10063-RA	CG10063	CG10063	FBtr0076935	FBgn0035727	212	638	0	0	0	5.93442	0.121389	0.217637	0	0	0
CG10064-RA	CG10064	CG10064	FBtr0076937	FBgn0035724	742	2228	0	0	0.21281	1.93227	0.0464178	0.138703	0	0	1.53428
Act57B-RA	Act57B	CG10067	FBtr0071519	FBgn0000044	376	1130	482.565	144.805	146.298	338.452	15.7513	95.0853	1.4258	9.19318	1.5386
CG10068-RA	CG10068	CG10068	FBtr0081611	FBgn0037473	316	950	7.60262	8.6778	8.9837	7.39789	4.5378	7.71816	1.02767	1.91233	1.16397
MFS16-RA	MFS16	CG10069	FBtr0071589	FBgn0034611	528	1586	17.8361	7.08808	8.56999	8.32017	4.39258	5.70485	2.14372	1.61365	1.50223
emc-RA	emc	CG1007	FBtr0072578	FBgn0000575	199	599	104.499	217.702	188.126	42.0514	71.4923	58.7509	2.48503	3.04512	3.20209
RpL29-RA	RpL29	CG10071	FBtr0071592	FBgn0016726	76	230	455.331	380.154	297.54	1974.54	1508.19	1489.18	0.230601	0.25206	0.199801
sgl-RA	sgl	CG10072	FBtr0076938	FBgn0261445	476	1430	10.5223	14.3251	31.8304	8.89259	18.754	31.6107	1.18326	0.763841	1.00695
CG10073-RC	CG10073	CG10073	FBtr0310321	FBgn0034440	881	2645	0.455103	0.0944482	0.119506	0.226355	0.029236	0.0327604	2.01057	3.23055	3.64787
CG10075-RA	CG10075	CG10075	FBtr0076939	FBgn0035722	259	779	14.6799	25.0136	17.8538	18.7462	27.6179	19.663	0.783084	0.905704	0.907991
spir-RC	spir	CG10076	FBtr0081355	FBgn0003475	625	1877	14.1089	13.9748	13.6407	23.4799	32.3745	25.9683	0.600894	0.431659	0.525282
CG10077-RD	CG10077	CG10077	FBtr0333083	FBgn0035720	818	2456	113.219	251.748	81.0825	158.3	77.8015	64.1733	0.715218	3.23577	1.26349
Prat2-RA	Prat2	CG10078	FBtr0076946	FBgn0041194	470	1412	127.451	16.6308	22.9459	34.0457	9.95221	21.5815	3.74352	1.67106	1.06322
Egfr-RA	Egfr	CG10079	FBtr0071653	FBgn0003731	1377	4133	26.2128	3.5662	11.8545	7.27244	2.12477	6.81764	3.6044	1.6784	1.73879
mahj-RA	mahj	CG10080	FBtr0071658	FBgn0034641	1544	4634	5.32517	3.61192	5.42283	2.7588	2.28192	3.00746	1.93025	1.58284	1.80313
CG10081-RA	CG10081	CG10081	FBtr0086524	FBgn0034441	875	2627	0.916443	0	0.0601624	0	0	0	#DIV/0!	#DIV/0!	#DIV/0!
CG10082-RA	CG10082	CG10082	FBtr0071661	FBgn0034644	902	2708	15.7803	21.5867	12.7231	40.8452	42.7751	30.0376	0.386344	0.504656	0.423572
Abp1-RA	Abp1	CG10083	FBtr0075819	FBgn0036372	531	1595	9.05641	30.5417	7.82801	8.26103	22.8887	7.69139	1.09628	1.33436	1.01776
swm-RB	swm	CG10084	FBtr0081245	FBgn0002044	1062	3188	19.257	22.9598	17.8967	14.0994	24.5921	16.5228	1.3658	0.933624	1.08316
CG10086-RA	CG10086	CG10086	FBtr0081744	FBgn0037517	469	1409	0	0.709199	0	1.35816	0.0215427	0.0482795	0	32.9206	0
CG10089-RE	CG10089	CG10089	FBtr0331535	FBgn0036369	447	1343	2.24078	16.1831	0.706091	9.9367	22.4079	5.26306	0.225506	0.722207	0.13416
Psa-RF	Psa	CG1009	FBtr0072702	FBgn0261243	866	2600	25.9269	27.7679	15.8654	13.5095	17.5012	12.5425	1.91916	1.58663	1.26494
Tim17a1-RB	Tim17a1	CG10090	FBtr0344388	FBgn0038018	222	668	0	0	0	3.31744	0	0.055737	0	#DIV/0!	0
GstD9-RA	GstD9	CG10091	FBtr0082608	FBgn0038020	218	656	49.5445	14.471	272.004	22.293	5.37567	91.2186	2.22242	2.69195	2.98189
ArgRS-m-RA	ArgRS-m	CG10092	FBtr0081752	FBgn0037526	594	1784	2.02424	3.78084	1.77182	1.80275	0.887618	1.49419	1.12287	4.25953	1.1858
Cyp313a3-RA	Cyp313a3	CG10093	FBtr0082617	FBgn0038007	492	1478	0	0	0	0.0499878	0.0451948	0	0	0	#DIV/0!
Cyp313a2-RB	Cyp313a2	CG10094	FBtr0308561	FBgn0038006	493	1481	0	0	0	0.0140818	0.0954874	0.0253626	0	0	0
dpr15-RB	dpr15	CG10095	FBtr0339647	FBgn0037993	662	1988	5.75232	20.1059	0.636002	3.07473	5.50782	1.40461	1.87084	3.65042	0.452796
CG10096-RB	CG10096	CG10096	FBtr0082604	FBgn0038032	502	1508	0.798242	0.993961	1.15286	11.4714	0.0218119	0.124922	0.0695851	45.5697	9.22862
CG10097-RB	CG10097	CG10097	FBtr0100525	FBgn0038033	501	1505	0.799833	0.497971	0.735101	12.1924	0.120192	0.14252	0.0656011	4.14312	5.15787
CG10098-RA	CG10098	CG10098	FBtr0081563	FBgn0037472	353	1061	22.6908	115.607	15.4918	11.9443	25.7919	12.5316	1.89973	4.48232	1.23622
Ir84a-RB	Ir84a	CG10101	FBtr0336955	FBgn0037501	644	1934	0	0	0	0	0.0103761	0.0206702	#DIV/0!	0	0
CG10103-RA	CG10103	CG10103	FBtr0076949	FBgn0035715	417	1253	23.0566	38.0804	35.0654	11.2903	9.81999	16.6093	2.04216	3.87785	2.11119
CG10104-RA	CG10104	CG10104	FBtr0087486	FBgn0033933	404	1214	0	0	0	0.308024	0	0.079254	0	#DIV/0!	0
Sin1-RA	Sin1	CG10105	FBtr0087487	FBgn0033935	569	1709	2.11308	4.67764	3.5142	2.1473	6.13626	2.75755	0.98406	0.762295	1.27439
Tsp42Ee-RB	Tsp42Ee	CG10106	FBtr0336871	FBgn0029506	228	686	438.684	190.821	1085.59	149.082	68.4187	297.898	2.94258	2.78902	3.64417
velo-RD	velo	CG10107	FBtr0345025	FBgn0035713	711	2135	5.07435	6.90356	3.40522	15.5004	25.1456	14.5049	0.32737	0.274543	0.234764
phyl-RA	phyl	CG10108	FBtr0087516	FBgn0013725	400	1202	9.01309	44.892	1.18338	12.136	41.1546	6.04085	0.742674	1.09081	0.195896
Cpsf160-RB	Cpsf160	CG10110	FBtr0089257	FBgn0024698	1420	4262	2.68316	2.52043	1.85414	1.44464	1.72962	1.78272	1.85731	1.45722	1.04006
Cpr51A-RA	Cpr51A	CG10112	FBtr0087514	FBgn0033942	144	434	16.6417	7.48295	54.6244	6.72011	1.04861	11.443	2.4764	7.13606	4.7736
wa-cup-RB	wa-cup	CG10113	FBtr0301649	FBgn0037502	580	1742	0	0	0	2.42409	0.0106911	0.026622	0	0	0
CG10116-RA	CG10116	CG10116	FBtr0075824	FBgn0036367	289	869	0	0.862424	0.545615	6.67663	0.284326	0.718898	0	3.03322	0.758961
ttv-RC	ttv	CG10117	FBtr0333165	FBgn0265974	299	899	1.33899	4.16822	1.93383	4.87403	2.5663	4.57216	0.274718	1.62421	0.422957
ple-RA	ple	CG10118	FBtr0076956	FBgn0005626	508	1526	41.019	130.146	84.3053	9.07049	14.1221	10.5488	4.52224	9.21582	7.99193
LamC-RA	LamC	CG10119	FBtr0087512	FBgn0010397	621	1865	16.136	13.127	12.6268	10.1982	4.55928	11.1229	1.58225	2.87919	1.1352
Men-RC	Men	CG10120	FBtr0330025	FBgn0002719	578	1736	359.183	121.598	148.123	76.8793	43.4	52.9188	4.67204	2.8018	2.79906
SP1173-RB	SP1173	CG10121	FBtr0076961	FBgn0035710	741	2225	18.6649	18.9747	27.6315	11.0528	5.39599	16.0718	1.6887	3.51645	1.71926
RpI1-RA	RpI1	CG10122	FBtr0087511	FBgn0019938	1642	4928	4.51894	2.83881	2.72605	2.52333	2.4692	2.64453	1.79086	1.14969	1.03082
Top3ﾎｱ-RA	Top3ﾎｱ	CG10123	FBtr0081246	FBgn0040268	1250	3752	0.802071	1.39822	0.631849	2.10472	3.3301	3.64048	0.381082	0.419873	0.173562
eIF4E4-RA	eIF4E4	CG10124	FBtr0076963	FBgn0035709	229	689	0	0	0	14.1083	0.0389482	0.106684	0	0	0
zpg-RA	zpg	CG10125	FBtr0076983	FBgn0024177	367	1103	0	1.8119	0	3.35777	0.151791	0.570402	0	11.9368	0
CG10126-RB	CG10126	CG10126	FBtr0082687	FBgn0038088	227	683	57.2794	45.7202	174.013	31.2229	21.9053	74.2816	1.83453	2.08718	2.34262
tra2-RD	tra2	CG10128	FBtr0089615	FBgn0003742	226	680	2.65533	8.81701	5.57812	14.2682	12.6467	9.99921	0.186101	0.697177	0.557856
ndl-RA	ndl	CG10129	FBtr0076984	FBgn0002926	2616	7850	0	0.127294	0.0402667	0.151105	0.00731876	0	0	17.3929	#DIV/0!
Sec61ﾎｲ-RA	Sec61ﾎｲ	CG10130	FBtr0087498	FBgn0010638	100	302	161.43	119.944	132.403	115.017	108.02	104.461	1.40353	1.1104	1.26748
Had2-RA	Had2	CG10131	FBtr0087499	FBgn0033949	315	947	11.4401	1.31898	2.0027	13.0766	1.84078	6.09593	0.874852	0.716534	0.328531
CG10132-RB	CG10132	CG10132	FBtr0343771	FBgn0032798	1361	4085	3.09409	9.17315	3.21123	5.74857	13.0835	5.03024	0.538237	0.701122	0.638385
JMJD7-RA	JMJD7	CG10133	FBtr0075825	FBgn0036366	316	950	1.90066	4.20742	1.49728	5.36451	11.8142	6.61753	0.354302	0.356131	0.22626
beat-Va-RC	beat-Va	CG10134	FBtr0337093	FBgn0038087	300	902	2.0018	17.4483	0.175218	2.48058	6.42666	1.78021	0.806989	2.71499	0.0984255
CG10137-RA	CG10137	CG10137	FBtr0081248	FBgn0032800	941	2825	1.91748	9.72733	0.559457	6.92293	17.6575	4.15833	0.276974	0.550888	0.134539
PpD5-RA	PpD5	CG10138	FBtr0071806	FBgn0005778	346	1040	0	0	0	1.16331	0	0.03909	0	#DIV/0!	0
CG10139-RA	CG10139	CG10139	FBtr0087433	FBgn0033951	224	674	31.2546	44.1069	26.4974	10.6594	30.2992	13.3565	2.93212	1.45571	1.98386
robl62A-RA	robl62A	CG1014	FBtr0072695	FBgn0028567	104	314	0	0	0	56.9814	0.0668369	1.15836	0	0	0
CG10140-RA	CG10140	CG10140	FBtr0075853	FBgn0036363	297	893	0	0	0	0.18334	0	0.0309573	0	#DIV/0!	0
Ance-5-RA	Ance-5	CG10142	FBtr0072420	FBgn0035076	628	1886	31.2745	3.17899	4.69279	12.2685	2.34368	9.6637	2.54918	1.35641	0.485611
Adgf-E-RA	Adgf-E	CG10143	FBtr0087482	FBgn0033952	539	1619	0	0	0.0976199	2.15747	0.0056052	0.0223321	0	0	4.37128
Vps8-RA	Vps8	CG10144	FBtr0076986	FBgn0035704	1229	3689	2.121	2.57332	2.27066	2.12639	2.8295	2.03845	0.997464	0.909462	1.11392
mspo-RB	mspo	CG10145	FBtr0345427	FBgn0020269	601	1805	17.0059	62.1425	1.66365	9.74529	19.5937	5.46108	1.74503	3.17156	0.304637
AttA-RA	AttA	CG10146	FBtr0087437	FBgn0012042	221	665	38.0131	8.64023	6.17927	20.9983	6.23937	7.53105	1.81029	1.38479	0.820505
CG10147-RB	CG10147	CG10147	FBtr0333060	FBgn0035702	448	1346	2.23579	2.41278	2.11355	1.73777	1.88172	1.64227	1.28659	1.28222	1.28697
Rpn6-RC	Rpn6	CG10149	FBtr0306558	FBgn0028689	422	1268	93.0342	79.5942	78.0262	39.4302	25.9429	31.965	2.35946	3.06805	2.44099
CG10151-RC	CG10151	CG10151	FBtr0087473	FBgn0033960	668	2006	2.10026	13.4497	0.393935	2.87703	15.9638	1.88919	0.73001	0.842511	0.20852
beat-IV-RB	beat-IV	CG10152	FBtr0332427	FBgn0039089	446	1340	4.94076	27.778	0.589726	8.40725	30.0493	6.14961	0.587678	0.924412	0.0958966
Trs31-RA	Trs31	CG10153	FBtr0087470	FBgn0266723	194	584	25.7652	44.0599	19.2146	21.2067	26.0921	16.4251	1.21495	1.68863	1.16983
CG10154-RB	CG10154	CG10154	FBtr0303093	FBgn0036361	316	950	0	0	0	0.477571	0	0	0	#DIV/0!	#DIV/0!
Spred-RC	Spred	CG10155	FBtr0329880	FBgn0020767	519	1559	8.10735	29.965	10.9487	21.0559	66.6104	25.2416	0.385039	0.449855	0.433757
GILT2-RA	GILT2	CG10157	FBtr0084435	FBgn0039099	207	623	97.5751	6.01482	42.3656	30.9714	2.81992	21.782	3.15049	2.13298	1.94498
Fgop2-RA	Fgop2	CG10158	FBtr0079366	FBgn0031871	315	947	6.35559	12.926	8.34459	12.1197	10.6334	8.39099	0.5244	1.21561	0.99447
BEAF-32-RB	BEAF-32	CG10159	FBtr0087442	FBgn0015602	282	848	22.7122	42.1269	20.5013	13.8013	19.513	10.5533	1.64566	2.15892	1.94265
Ldh-RA	Ldh	CG10160	FBtr0077008	FBgn0001258	332	998	13.2678	9.76233	14.0943	5.89102	3.79616	6.83627	2.2522	2.57163	2.0617
eIF3d1-RB	eIF3d1	CG10161	FBtr0089622	FBgn0040227	560	1682	51.8857	38.913	32.8872	41.2795	37.8704	52.968	1.25694	1.02753	0.620889
CG10163-RA	CG10163	CG10163	FBtr0077009	FBgn0035697	378	1136	0	0.219908	0	0.746303	0.0164572	0	0	13.3624	#DIV/0!
CG10164-RA	CG10164	CG10164	FBtr0084417	FBgn0039088	386	1160	0	0.430716	0	4.4575	0.00519343	0.0310374	0	82.9348	0
CG10165-RE	CG10165	CG10165	FBtr0344843	FBgn0032801	228	686	14.9153	2.9133	14.7449	10.6875	1.91609	10.0343	1.39558	1.52044	1.46944
CG10166-RA	CG10166	CG10166	FBtr0081279	FBgn0032799	241	725	26.5655	32.3899	36.6232	22.1796	19.8671	24.5413	1.19774	1.63033	1.49231
Ugt303B2-RA	Ugt303B2	CG10168	FBtr0084418	FBgn0039087	540	1622	0	0	0	0.0478601	0	0	0	#DIV/0!	#DIV/0!
Mfap1-RA	Mfap1	CG1017	FBtr0072841	FBgn0035294	478	1436	7.54438	16.7008	10.3457	5.73	15.3389	6.81873	1.31665	1.08879	1.51724
Ugt303B3-RA	Ugt303B3	CG10170	FBtr0084420	FBgn0039085	539	1619	0.743514	1.23442	0.4881	0.906411	0.022764	0.0226739	0.820283	54.2269	21.5269
CG10171-RA	CG10171	CG10171	FBtr0075864	FBgn0036353	330	992	8.49419	11.836	9.87791	6.67177	7.50893	8.49095	1.27315	1.57626	1.16335
Best2-RA	Best2	CG10173	FBtr0077010	FBgn0035696	809	2429	12.1416	5.96513	8.06825	10.4493	4.34444	8.67425	1.16195	1.37305	0.930138
Ntf-2r-RA	Ntf-2r	CG10174	FBtr0081063	FBgn0032680	130	392	9.21236	1.27457	6.85406	2.39064	0	0.0518766	3.85351	#DIV/0!	132.122
CG10175-RA	CG10175	CG10175	FBtr0084421	FBgn0039084	644	1934	23.9629	5.29598	6.04729	6.94322	0.550657	1.91546	3.45127	9.61757	3.15709
grnd-RC	grnd	CG10176	FBtr0332321	FBgn0032682	241	725	22.4146	8.26975	6.97585	5.64694	1.39589	3.59495	3.96934	5.92438	1.94046
CG10177-RA	CG10177	CG10177	FBtr0084424	FBgn0039083	411	1235	0	0	1.4077	4.54025	0.0279246	0.52847	0	0	2.66373
Ugt301D1-RB	Ugt301D1	CG10178	FBtr0305619	FBgn0032684	530	1592	44.9893	22.5964	70.3863	11.1673	3.23971	10.8399	4.02866	6.97481	6.49328
Mdr65-RA	Mdr65	CG10181	FBtr0077011	FBgn0004513	1302	3908	22.7936	8.11836	261.659	4.36623	0.655503	22.5641	5.22044	12.3849	11.5962
CG10182-RA	CG10182	CG10182	FBtr0084486	FBgn0039091	699	2099	0	0	0	0.642519	0	0.0316431	0	#DIV/0!	0
CG10183-RB	CG10183	CG10183	FBtr0273191	FBgn0039093	685	2057	0	0	0	0	0	0	#DIV/0!	#DIV/0!	#DIV/0!
CG10184-RA	CG10184	CG10184	FBtr0084481	FBgn0039094	383	1151	15.6874	4.77493	28.0117	8.51549	1.7436	11.6683	1.84222	2.73855	2.40068
CG10185-RA	CG10185	CG10185	FBtr0083235	FBgn0038397	1732	5198	0.347369	0.913138	0	0.0536702	0.0485242	0.0316019	6.47229	18.8182	0
Hasp-RD	Hasp	CG10186	FBtr0299519	FBgn0032797	314	944	165.133	801.05	15.068	113.472	436.957	64.7032	1.45528	1.83325	0.232879
CG10188-RB	CG10188	CG10188	FBtr0081282	FBgn0032796	1309	3929	6.58707	12.1442	1.247	4.97275	13.7323	2.95414	1.32463	0.884357	0.422118
CG10189-RA	CG10189	CG10189	FBtr0081284	FBgn0032793	405	1217	2.96733	4.92652	6.36342	4.56956	6.40295	9.54367	0.649369	0.769414	0.666769
Mlp84B-RA	Mlp84B	CG1019	FBtr0081616	FBgn0014863	495	1487	15.7855	7.72798	11.0537	65.1956	6.14302	29.5683	0.242126	1.25801	0.373836
Poc1-RA	Poc1	CG10191	FBtr0075863	FBgn0036354	391	1175	2.04893	1.48826	2.95917	2.88245	0.403759	1.82801	0.71083	3.68602	1.61879
eIF4G2-RC	eIF4G2	CG10192	FBtr0344335	FBgn0260634	2072	6218	2.51668	5.42378	2.313	12.9835	35.0159	14.4516	0.193837	0.154895	0.160052
CG10194-RA	CG10194	CG10194	FBtr0081285	FBgn0032790	351	1055	9.12795	5.9198	4.1946	8.75488	5.11447	4.52639	1.04261	1.15746	0.926699
CG10195-RB	CG10195	CG10195	FBtr0302930	FBgn0032787	361	1085	6.10195	2.53269	5.38961	4.62836	1.26083	3.00044	1.31838	2.00875	1.79627
kn-RE	kn	CG10197	FBtr0329882	FBgn0001319	524	1574	0.76477	6.34855	0.401643	0.682827	5.35042	1.33232	1.12001	1.18655	0.301462
Nup98-96-RD	Nup98-96	CG10198	FBtr0334894	FBgn0039120	1960	5882	5.93484	10.7877	8.35643	3.15512	4.93647	3.51345	1.88102	2.1853	2.37841
hui-RB	hui	CG10200	FBtr0087444	FBgn0033968	202	608	198.975	32.4596	33.273	47.4396	4.26722	13.8817	4.19428	7.60673	2.39689
Pgm2b-RA	Pgm2b	CG10202	FBtr0087464	FBgn0033969	628	1886	0	0	0	2.9444	0	0.0485634	0	#DIV/0!	0
x16-RA	x16	CG10203	FBtr0079368	FBgn0028554	258	776	20.1659	47.3233	7.12839	13.816	49.5417	10.4913	1.4596	0.955221	0.67946
CG10205-RB	CG10205	CG10205	FBtr0087446	FBgn0033970	122	368	104.674	40.0519	35.2169	40.2765	6.03755	20.1517	2.59888	6.63381	1.74759
nop5-RA	nop5	CG10206	FBtr0079369	FBgn0026196	511	1535	23.1339	6.02161	7.92807	17.2218	11.8496	19.469	1.34329	0.508171	0.407216
NaPi-T-RB	NaPi-T	CG10207	FBtr0329884	FBgn0016684	524	1574	1.14716	2.69813	3.7152	2.40827	0.38732	1.48059	0.476339	6.96617	2.50927
CG10208-RA	CG10208	CG10208	FBtr0084461	FBgn0039118	276	830	9.42695	1.50491	39.6069	6.13616	1.17938	16.6434	1.53629	1.27602	2.37973
CG10209-RB	CG10209	CG10209	FBtr0329883	FBgn0033971	530	1592	3.40256	7.84596	2.48189	4.57527	9.58755	4.53522	0.743684	0.818349	0.547248
Dmtn-RH	Dmtn	CG1021	FBtr0300261	FBgn0037443	679	2039	28.9277	24.9938	30.0746	30.4361	26.5921	29.0346	0.950441	0.939894	1.03582
tst-RA	tst	CG10210	FBtr0084462	FBgn0039117	1197	3593	4.35534	3.33736	3.29905	2.24531	2.51668	2.41671	1.93975	1.3261	1.3651
CG10211-RB	CG10211	CG10211	FBtr0343824	FBgn0032685	1394	4184	12.2274	2.20917	10.4256	1.7168	0.441271	2.08582	7.12219	5.00639	4.99834
SMC2-RA	SMC2	CG10212	FBtr0087461	FBgn0027783	1179	3539	1.02041	1.48237	0.982488	1.37214	2.35601	1.1598	0.743664	0.629188	0.847118
CG10214-RA	CG10214	CG10214	FBtr0084463	FBgn0039115	211	635	18.0088	36.9806	17.6714	8.72257	11.9742	8.55603	2.06463	3.08834	2.06537
Ercc1-RA	Ercc1	CG10215	FBtr0087448	FBgn0028434	259	779	0.772624	0.641375	2.43461	1.51943	1.98665	0.926243	0.508496	0.322843	2.62848
udt-RB	udt	CG10217	FBtr0084464	FBgn0039113	619	1859	21.0446	20.0229	24.2298	10.9549	6.51811	13.5199	1.92101	3.07188	1.79216
SdhD-RA	SdhD	CG10219	FBtr0084466	FBgn0039112	182	548	228.449	514.674	195.828	115.904	135.615	73.8085	1.97102	3.79511	2.65319
Hrd3-RA	Hrd3	CG10221	FBtr0084467	FBgn0028475	819	2459	21.0497	20.7248	19.2818	7.94369	5.96288	7.80878	2.64986	3.47564	2.46925
CG10222-RA	CG10222	CG10222	FBtr0075861	FBgn0036356	307	923	0.652085	1.89459	3.2534	3.26696	2.59852	3.35169	0.1996	0.729103	0.970673
Top2-RA	Top2	CG10223	FBtr0081287	FBgn0284220	1447	4343	12.3341	13.0574	5.53145	4.3433	4.18525	2.50082	2.83979	3.11985	2.21186
RanBP3-RA	RanBP3	CG10225	FBtr0084468	FBgn0039110	449	1349	20.5235	24.2593	17.2223	8.6319	11.7347	7.77905	2.37764	2.06731	2.21393
CG10226-RB	CG10226	CG10226	FBtr0332068	FBgn0035695	1206	3620	20.1179	6.83197	171.144	4.967	1.38512	34.3023	4.05031	4.93241	4.9893
Pcf11-RC	Pcf11	CG10228	FBtr0302109	FBgn0264962	86	260	11.5745	16.3341	9.72595	21.7461	8.99702	13.2957	0.532256	1.8155	0.731513
Kat60-RA	Kat60	CG10229	FBtr0078827	FBgn0040208	572	1718	4.90468	5.23478	5.61167	8.82044	9.31429	7.14731	0.556058	0.562016	0.785144
Rpn9-RA	Rpn9	CG10230	FBtr0084470	FBgn0028691	382	1148	52.9524	72.4639	54.6555	25.621	20.782	26.08	2.06676	3.48685	2.09568
CG10232-RD	CG10232	CG10232	FBtr0345300	FBgn0039108	509	1529	0.393639	0.163385	0	1.72748	0.0215427	0.21994	0.227869	7.58423	0
rtp-RA	rtp	CG10233	FBtr0078825	FBgn0087005	198	596	705.889	1923.91	43.7545	243.167	330.343	125.605	2.9029	5.82399	0.348351
Hs2st-RA	Hs2st	CG10234	FBtr0081288	FBgn0024230	349	1049	10.3277	9.04956	3.16395	11.6816	9.23069	8.48601	0.884101	0.980377	0.372842
LanA-RA	LanA	CG10236	FBtr0077014	FBgn0002526	3712	11138	5.99821	1.79433	9.5072	1.31837	0.360679	1.61664	4.54973	4.97486	5.88085
CG10237-RA	CG10237	CG10237	FBtr0081207	FBgn0032783	301	905	297.279	126.15	174.288	51.2522	18.0295	43.2103	5.80033	6.99685	4.03348
Mocs2B-RA	Mocs2B	CG10238	FBtr0084782	FBgn0039280	367	1103	7.09371	5.88867	10.1734	9.07049	5.34466	9.19646	0.782065	1.10179	1.10624
CG1024-RD	CG1024	CG1024	FBtr0332175	FBgn0027514	543	1631	3.69022	5.51401	2.90705	2.02197	4.08197	2.03486	1.82506	1.35082	1.42862
Cyp6a22-RC	Cyp6a22	CG10240	FBtr0345526	FBgn0013773	499	1499	10.4394	1.33324	5.4826	5.97576	0.987939	4.53578	1.74697	1.34951	1.20875
Cyp6a17-RA	Cyp6a17	CG10241	FBtr0087451	FBgn0015714	501	1505	51.9891	15.7691	148.805	28.9439	7.14282	69.5094	1.7962	2.20768	2.14079
Cyp6a23-RA	Cyp6a23	CG10242	FBtr0087452	FBgn0033978	502	1508	3.59209	2.98188	13.1007	3.8462	1.47078	8.20492	0.933932	2.02742	1.59669
Cyp6a19-RA	Cyp6a19	CG10243	FBtr0087453	FBgn0033979	503	1511	0	0.826656	0.209195	4.14252	0.148154	0.448607	0	5.57971	0.466321
Cad96Ca-RA	Cad96Ca	CG10244	FBtr0084874	FBgn0022800	773	2321	2.85248	1.07633	1.90664	3.38509	1.1921	2.99058	0.842663	0.902884	0.637548
Cyp6a20-RB	Cyp6a20	CG10245	FBtr0300127	FBgn0033980	501	1505	5.59883	5.64367	140.089	10.7521	3.17722	31.3634	0.520719	1.77629	4.46664
Cyp6a9-RB	Cyp6a9	CG10246	FBtr0300128	FBgn0013771	504	1514	42.5367	9.90021	53.0302	7.99409	3.23044	9.95848	5.32102	3.06466	5.32513
Cyp6a21-RA	Cyp6a21	CG10247	FBtr0087456	FBgn0033981	504	1514	15.9016	9.90021	14.6146	4.31615	1.28641	4.18115	3.6842	7.69602	3.49535
Cyp6a8-RA	Cyp6a8	CG10248	FBtr0087455	FBgn0013772	506	1520	5.93955	8.21761	6.55062	2.0823	0.907504	2.09978	2.8524	9.05519	3.11967
Kank-RJ	Kank	CG10249	FBtr0303758	FBgn0027596	446	1340	4.04244	16.5922	2.12301	17.9189	45.0717	12.8672	0.225597	0.36813	0.164995
nau-RA	nau	CG10250	FBtr0084472	FBgn0002922	332	998	0	0	0	0.3189	0.0262112	0.169699	0	0	0
prt-RB	prt	CG10251	FBtr0113347	FBgn0043005	602	1808	1.66448	17.1334	0.262245	1.49951	13.7142	1.5341	1.11001	1.24932	0.170944
CG10252-RA	CG10252	CG10252	FBtr0084475	FBgn0039104	229	689	0	0	0.458771	76.2185	0.120515	1.02033	0	0	0.449631
ADPS-RD	ADPS	CG10253	FBtr0303762	FBgn0033983	631	1895	4.44656	11.7328	2.33525	7.81822	15.3263	5.29453	0.568744	0.765533	0.441069
CG10254-RB	CG10254	CG10254	FBtr0084476	FBgn0027512	1398	4196	2.58192	6.37041	2.93795	9.64744	10.8625	4.58427	0.267627	0.58646	0.640877
Lap1-RA	Lap1	CG10255	FBtr0087407	FBgn0033984	849	2549	1.41673	2.15612	1.61209	4.15868	3.88688	2.23658	0.340668	0.554717	0.720783
CG10257-RA	CG10257	CG10257	FBtr0087408	FBgn0033985	228	686	5.26421	13.474	0.230389	8.57964	6.49576	5.24287	0.61357	2.07428	0.0439432
PI4KIIIﾎｱ-RD	PI4KIIIﾎｱ	CG10260	FBtr0331587	FBgn0267350	2154	6464	12.5701	17.6231	4.59665	10.9808	31.3791	10.0758	1.14474	0.56162	0.456209
PCNA2-RA	PCNA2	CG10262	FBtr0081262	FBgn0032813	255	767	5.49299	8.14261	10.715	2.92085	6.068	3.76179	1.88061	1.34189	2.84838
Hakai-RA	Hakai	CG10263	FBtr0081263	FBgn0032812	302	908	5.30286	7.42843	4.3515	5.18976	10.7167	6.2661	1.02179	0.693167	0.694452
CG10264-RA	CG10264	CG10264	FBtr0083222	FBgn0038394	270	812	0	0	0	0.0212102	0	0	0	#DIV/0!	#DIV/0!
CG10265-RA	CG10265	CG10265	FBtr0087421	FBgn0033990	340	1022	4.12243	8.55532	3.24753	5.95799	14.3973	6.21902	0.691915	0.594233	0.522194
Zif-RB	Zif	CG10267	FBtr0302383	FBgn0037446	388	1166	8.25899	14.569	10.9792	8.41128	14.1006	10.4655	0.981895	1.03322	1.04909
CG10268-RA	CG10268	CG10268	FBtr0081266	FBgn0032811	189	569	5.28888	3.95139	4.44419	4.45678	11.7844	9.38507	1.1867	0.335306	0.473538
D19A-RA	D19A	CG10269	FBtr0077016	FBgn0022935	845	2537	6.64268	11.0285	5.04603	2.95362	6.17612	3.22585	2.249	1.78567	1.56425
D19B-RA	D19B	CG10270	FBtr0077017	FBgn0022699	774	2324	3.10778	9.02947	2.99228	3.03538	8.97332	3.22507	1.02385	1.00626	0.927817
CG10274-RB	CG10274	CG10274	FBtr0113149	FBgn0035690	863	2591	1.85835	2.69966	1.89095	2.10799	5.6746	2.98922	0.881577	0.475746	0.63259
kon-RD	kon	CG10275	FBtr0332323	FBgn0032683	2381	7145	2.86406	0.279709	8.49404	1.32122	0.279969	1.9932	2.16775	0.999071	4.2615
gzl-RD	gzl	CG10277	FBtr0113198	FBgn0037442	536	1610	36.6358	43.291	37.9901	18.7192	23.737	23.4094	1.95713	1.82377	1.62286
GATAe-RC	GATAe	CG10278	FBtr0303261	FBgn0038391	731	2195	0.822607	0.910489	0.216009	1.09531	0.0244086	0.0208389	0.751025	37.302	10.3657
Rm62-RD	Rm62	CG10279	FBtr0078650	FBgn0003261	575	1727	151.253	194.413	101.582	116.48	120.423	87.8603	1.29853	1.61442	1.15617
Antp-RG	Antp	CG1028	FBtr0081649	FBgn0260642	361	1085	1.66417	0.230245	0.58266	1.34487	0.313716	0.424536	1.23742	0.733927	1.37247
CG10280-RA	CG10280	CG10280	FBtr0078648	FBgn0037395	356	1070	0	0	0	0.0207349	0	0	0	#DIV/0!	#DIV/0!
TfIIFﾎｱ-RA	TfIIFﾎｱ	CG10281	FBtr0081719	FBgn0010282	577	1733	7.29334	8.64912	4.10392	11.39	23.7505	14.4209	0.640328	0.364167	0.284581
CG10283-RA	CG10283	CG10283	FBtr0081085	FBgn0032681	730	2192	4.39324	8.43355	3.38877	3.61617	5.09689	2.972	1.21489	1.65465	1.14023
CG10286-RA	CG10286	CG10286	FBtr0081717	FBgn0037439	625	1877	6.41315	3.85969	4.29429	3.75796	3.53299	3.51437	1.70655	1.09247	1.22192
Gasp-RA	Gasp	CG10287	FBtr0078619	FBgn0026077	258	776	52.7416	76.6186	102.038	14.6171	3.548	11.9237	3.60821	21.5949	8.55755
fmt-RA	fmt	CG10289	FBtr0077019	FBgn0035688	991	2975	19.8264	14.0233	17.7968	13.1953	14.8438	18.6089	1.50253	0.944721	0.956362
how-RA	how	CG10293	FBtr0084177	FBgn0264491	405	1217	34.1243	8.21086	42.0765	7.73102	2.54265	7.68103	4.41395	3.22925	5.47798
Pak-RJ	Pak	CG10295	FBtr0334544	FBgn0267698	704	2114	14.8049	17.7258	9.64428	7.43456	13.6327	6.24148	1.99136	1.30024	1.54519
Hr83-RA	Hr83	CG10296	FBtr0081713	FBgn0037436	278	836	0	1.19529	0.189051	0.0530635	0.479757	0.0716789	0	2.49145	2.63747
Acp65Aa-RA	Acp65Aa	CG10297	FBtr0077021	FBgn0020765	105	317	0	18.1254	2.49285	5.66912	0.0652937	0.455249	0	277.598	5.4758
CG10298-RA	CG10298	CG10298	FBtr0081710	FBgn0037432	187	563	4.27619	2.66233	1.68433	8.10781	0.0404251	0.174483	0.527416	65.8583	9.65329
Scr-RB	Scr	CG1030	FBtr0081658	FBgn0003339	417	1253	4.32312	5.78184	1.76588	1.82692	4.32829	1.28156	2.36635	1.33583	1.37791
CG10300-RA	CG10300	CG10300	FBtr0084445	FBgn0039107	311	935	0	0.534365	0	0.329215	0.00676476	0.0336901	0	78.9924	0
CG10301-RB	CG10301	CG10301	FBtr0114504	FBgn0039106	306	920	0	0	0	0.288692	0.0200778	0.0199984	0	0	0
bsf-RA	bsf	CG10302	FBtr0081087	FBgn0284256	1412	4238	18.6044	27.9996	10.6657	6.62176	11.3453	7.05576	2.80959	2.46795	1.51163
Osi4-RA	Osi4	CG10303	FBtr0078615	FBgn0037412	393	1181	0	0.423057	0.133824	0.0878908	0.218525	0.0791494	0	1.93597	1.69078
RpS26-RA	RpS26	CG10305	FBtr0081089	FBgn0261597	114	344	488.148	330.424	387.766	1408.14	1169.86	1627.81	0.346663	0.282447	0.238213
eIF3k-RA	eIF3k	CG10306	FBtr0071670	FBgn0034654	222	668	91.903	66.1936	57.9662	137.59	119.396	127.317	0.667948	0.554404	0.45529
CG10307-RB	CG10307	CG10307	FBtr0345486	FBgn0034655	341	1025	4.69756	0.731167	2.46707	15.8676	3.27522	15.6997	0.296047	0.223242	0.157141
CycJ-RA	CycJ	CG10308	FBtr0073127	FBgn0010317	386	1160	0.518857	0.861432	0.408741	2.20869	5.90244	0.493872	0.234917	0.145945	0.827626
pad-RB	pad	CG10309	FBtr0301514	FBgn0038418	924	2774	1.30182	3.15196	0.512768	1.4642	2.09604	0.909574	0.889098	1.50377	0.563746
ﾎｱ-Est1-RA	ﾎｱ-Est1	CG1031	FBtr0081544	FBgn0015568	565	1697	36.531	9.12702	8.94076	18.1799	8.41225	19.1318	2.00942	1.08497	0.467325
CG10311-RB	CG10311	CG10311	FBtr0345202	FBgn0038420	165	497	105.358	34.6826	193.663	36.4188	11.8507	59.7375	2.89297	2.92663	3.2419
eIF2Bﾎｴ-RB	eIF2Bﾎｴ	CG10315	FBtr0072015	FBgn0034858	576	1730	7.30599	10.5413	7.1258	6.52892	9.77732	6.67106	1.11902	1.07814	1.06817
CG10317-RC	CG10317	CG10317	FBtr0300677	FBgn0038423	215	647	0	0	0	7.98534	0.010403	0.0725331	0	0	0
NC2ﾎｱ-RA	NC2ﾎｱ	CG10318	FBtr0071666	FBgn0034650	341	1025	5.28475	8.53028	5.85929	7.80394	9.91698	6.23433	0.67719	0.86017	0.939843
ND-B12-RE	ND-B12	CG10320	FBtr0300680	FBgn0034645	110	332	175.849	416.108	178.993	325.155	712.49	297.261	0.540815	0.58402	0.60214
CG10321-RA	CG10321	CG10321	FBtr0071660	FBgn0034643	835	2507	5.76186	6.57671	3.08906	6.14338	12.5622	7.78987	0.937898	0.523531	0.396549
CG10324-RA	CG10324	CG10324	FBtr0083356	FBgn0038454	543	1631	5.53532	3.82918	3.29466	2.17043	3.54771	1.92696	2.55033	1.07934	1.70977
abd-A-RB	abd-A	CG10325	FBtr0083388	FBgn0000014	590	1772	0.339658	0.281959	0.624338	0.694147	0.0102047	0.0152466	0.489317	27.6302	40.9494
Arl6IP1-RB	Arl6IP1	CG10326	FBtr0333728	FBgn0038453	197	593	76.1224	254.449	46.9076	39.475	80.7373	43.3497	1.92837	3.15157	1.08207
TBPH-RF	TBPH	CG10327	FBtr0301644	FBgn0025790	531	1595	22.2637	52.6257	18.4305	16.4539	41.9761	15.7449	1.35309	1.2537	1.17057
nonA-l-RA	nonA-l	CG10328	FBtr0083335	FBgn0015520	630	1892	6.04419	16.2406	2.67309	3.88127	10.6524	2.78686	1.55727	1.5246	0.959178
CG10332-RA	CG10332	CG10332	FBtr0072109	FBgn0260455	111	335	0	0	0	72.7815	9.19667	18.2394	0	0	0
CG10333-RA	CG10333	CG10333	FBtr0081072	FBgn0032690	822	2468	10.9742	22.9774	10.5663	4.04677	15.3456	6.11021	2.71184	1.49732	1.72929
spi-RE	spi	CG10334	FBtr0081270	FBgn0005672	234	704	29.0678	49.3244	136.495	57.2473	52.2679	102.662	0.507758	0.943683	1.32955
Pbgs-RA	Pbgs	CG10335	FBtr0076011	FBgn0036271	327	983	4.28598	7.62407	4.50184	4.10944	3.01604	3.38145	1.04296	2.52784	1.33133
CG10336-RA	CG10336	CG10336	FBtr0081095	FBgn0032698	307	923	0	3.24787	0.684926	2.04539	6.99256	1.61172	0	0.464475	0.424967
CG10337-RA	CG10337	CG10337	FBtr0081276	FBgn0032805	239	719	0.837099	1.38979	5.05573	1.36975	0.410225	1.43397	0.611133	3.38788	3.5257
CG10338-RA	CG10338	CG10338	FBtr0081096	FBgn0032700	417	1253	7.68554	8.97182	4.28858	4.33562	9.41548	5.1591	1.77265	0.95288	0.831264
CG10339-RA	CG10339	CG10339	FBtr0072288	FBgn0034972	603	1811	1.32937	2.20709	0.0872704	1.49329	2.16836	0.412601	0.890231	1.01786	0.211513
bcd-RA	bcd	CG1034	FBtr0081664	FBgn0000166	149	449	0	0	0	1.26125	0.0135753	0.0202824	0	0	0
CG10340-RA	CG10340	CG10340	FBtr0083358	FBgn0022344	278	836	34.5574	103.094	28.5467	22.5148	32.2144	13.2399	1.53487	3.20024	2.15611
CG10341-RA	CG10341	CG10341	FBtr0081097	FBgn0032701	564	1694	6.04006	5.45642	4.85149	4.83742	2.84069	2.15146	1.24861	1.9208	2.25498
NPF-RB	NPF	CG10342	FBtr0331685	FBgn0027109	102	308	66.4407	442.855	7.69708	47.0721	215.817	10.8872	1.41147	2.05199	0.706986
CG10343-RA	CG10343	CG10343	FBtr0081098	FBgn0032703	214	644	14.9534	10.4736	14.234	16.2799	17.2793	17.555	0.918518	0.606137	0.810826
CG10344-RB	CG10344	CG10344	FBtr0071841	FBgn0034729	278	836	0.719945	0.896467	3.21387	3.26574	0.733937	1.83179	0.220454	1.22145	1.7545
CG10345-RA	CG10345	CG10345	FBtr0083360	FBgn0027562	552	1658	172.068	49.5713	74.4478	21.1256	9.53344	15.9294	8.145	5.19973	4.67361
Grip71-RA	Grip71	CG10346	FBtr0081099	FBgn0032705	646	1940	0.930733	1.67402	0.733206	1.95141	0.965958	0.966532	0.476954	1.73302	0.758595
CG10347-RA	CG10347	CG10347	FBtr0073603	FBgn0030342	580	1742	5.52812	9.03466	3.3569	3.48038	4.67433	3.04829	1.58837	1.93282	1.10124
CG10348-RB	CG10348	CG10348	FBtr0301647	FBgn0032707	540	1622	2.22642	1.38615	1.65647	1.43738	1.04195	1.49739	1.54894	1.33034	1.10624
CG10352-RB	CG10352	CG10352	FBtr0331589	FBgn0030348	315	947	13.3467	5.01214	80.1081	3.36606	0.983018	12.8561	3.96509	5.09872	6.23112
CG10353-RC	CG10353	CG10353	FBtr0114451	FBgn0030349	984	2954	5.90872	3.38274	3.90569	12.9449	9.23875	9.44965	0.456452	0.366147	0.413316
Rat1-RA	Rat1	CG10354	FBtr0079345	FBgn0031868	908	2726	7.28608	12.0967	6.26157	3.28353	4.6093	2.14589	2.21897	2.62441	2.91793
CG10357-RC	CG10357	CG10357	FBtr0300062	FBgn0035453	321	965	1.24741	0	0	0	0	0	#DIV/0!	#DIV/0!	#DIV/0!
CG10359-RG	CG10359	CG10359	FBtr0290290	FBgn0035452	459	1379	5.67394	1.81157	2.97985	2.42643	0.387487	1.39538	2.3384	4.67517	2.13552
ref(2)P-RB	ref(2)P	CG10360	FBtr0100289	FBgn0003231	599	1799	157.243	140.113	167.008	70.6732	50.2867	69.6271	2.22494	2.78629	2.3986
CG10361-RA	CG10361	CG10361	FBtr0076084	FBgn0036208	417	1253	26.4191	3.7881	26.1099	5.44702	0.919005	8.23136	4.85019	4.12196	3.172
CG10362-RA	CG10362	CG10362	FBtr0073590	FBgn0030358	1037	3113	4.44687	9.1484	0.863088	4.87544	12.1552	2.84141	0.912096	0.752635	0.303754
Tep4-RA	Tep4	CG10363	FBtr0081254	FBgn0041180	1496	4490	158.042	39.5587	56.2843	18.3987	5.31673	18.3305	8.58988	7.44043	3.07053
msb1l-RA	msb1l	CG10364	FBtr0081258	FBgn0027949	381	1145	1.05131	0.436359	0.414096	2.32475	0.198426	0.527045	0.452224	2.1991	0.785694
CG10365-RA	CG10365	CG10365	FBtr0084448	FBgn0039109	284	854	4.22862	1.75514	17.5813	30.5328	14.3373	41.8327	0.138495	0.122418	0.420276
CG10366-RA	CG10366	CG10366	FBtr0081259	FBgn0032814	578	1736	1.38681	3.45367	1.54769	5.84793	11.9717	5.93067	0.237145	0.288486	0.260964
Hmgcr-RA	Hmgcr	CG10367	FBtr0084450	FBgn0263782	920	2762	5.88364	9.22562	5.83662	2.81514	3.08161	2.8442	2.08999	2.99376	2.05212
Irk3-RA	Irk3	CG10369	FBtr0081125	FBgn0032706	442	1328	16.7691	5.45531	76.7621	8.26624	1.3326	16.3593	2.02862	4.09374	4.69225
Rpt5-RA	Rpt5	CG10370	FBtr0084452	FBgn0028684	428	1286	54.2904	59.8314	56.6559	24.7731	17.0482	16.9624	2.19151	3.50953	3.34009
PTPMT1-RB	PTPMT1	CG10371	FBtr0084453	FBgn0039111	200	602	9.99791	9.12947	9.71383	8.50326	5.96095	7.21364	1.17577	1.53155	1.34659
Faf2-RB	Faf2	CG10372	FBtr0343115	FBgn0025608	464	1394	20.7245	22.2217	17.46	18.2314	31.0241	20.9023	1.13675	0.716273	0.835314
Jwa-RB	Jwa	CG10373	FBtr0343116	FBgn0032704	249	749	73.9285	106.73	105.716	55.9093	57.613	77.0133	1.32229	1.85254	1.3727
Lsd-1-RD	Lsd-1	CG10374	FBtr0335002	FBgn0039114	405	1217	294.755	10.4688	32.2067	72.1264	7.62031	29.6974	4.08665	1.37381	1.0845
CG10375-RB	CG10375	CG10375	FBtr0300681	FBgn0039116	160	482	9.98961	21.2499	17.3786	21.8756	59.3451	29.1022	0.456655	0.358073	0.597157
CG10376-RA	CG10376	CG10376	FBtr0081128	FBgn0032702	428	1286	6.08427	8.93585	10.3234	7.04408	10.7376	13.123	0.863742	0.832201	0.786668
Hrb27C-RF	Hrb27C	CG10377	FBtr0307030	FBgn0004838	421	1265	109.432	112.763	124.938	108.184	232.947	279.04	1.01154	0.484069	0.447742
mbc-RA	mbc	CG10379	FBtr0084459	FBgn0015513	1970	5912	9.87514	1.98602	26.9738	6.02681	2.0116	8.14655	1.63853	0.987279	3.31107
wrapper-RA	wrapper	CG10382	FBtr0071821	FBgn0025878	500	1502	44.0787	4.98966	123.428	6.47004	1.00034	12.9125	6.81274	4.98798	9.5588
CG10383-RA	CG10383	CG10383	FBtr0089628	FBgn0032699	784	2354	4.85795	7.11029	8.66101	6.44547	5.48467	8.84599	0.7537	1.29639	0.979088
CG10384-RE	CG10384	CG10384	FBtr0342992	FBgn0034731	492	1478	4.88666	17.7474	0.534664	7.58698	34.1516	5.75429	0.644086	0.519665	0.0929157
msl-1-RA	msl-1	CG10385	FBtr0081130	FBgn0005617	1039	3119	3.28049	4.80568	2.1789	3.26848	5.5023	3.21425	1.00368	0.873395	0.67789
tos-RA	tos	CG10387	FBtr0081131	FBgn0015553	732	2198	0	0.227312	0.0719047	1.338	0.730866	0.426745	0	0.311017	0.168496
Ubx-RE	Ubx	CG10388	FBtr0083351	FBgn0003944	380	1142	1.58111	0.218753	0.138395	0.463092	0.0579725	0.272677	3.41423	3.77338	0.507541
mia-RA	mia	CG10390	FBtr0089313	FBgn0014342	589	1769	1.0207	2.11828	1.16145	1.492	0.747786	0.481948	0.684115	2.83273	2.40991
Cyp310a1-RA	Cyp310a1	CG10391	FBtr0081077	FBgn0032693	492	1478	0	0	0	0.6563	0.0302741	0.00603089	0	0	0
sxc-RB	sxc	CG10392	FBtr0086084	FBgn0261403	1059	3179	38.8123	100.743	28.2386	16.1062	22.6378	13.8926	2.40978	4.45024	2.03264
amos-RA	amos	CG10393	FBtr0081081	FBgn0003270	198	596	0	0	0	0	0.0510886	0.15266	#DIV/0!	0	0
CG10395-RD	CG10395	CG10395	FBtr0347209	FBgn0033019	281	845	9.97188	41.9808	10.8482	6.70937	9.73133	5.123	1.48626	4.31399	2.11754
COX4L-RA	COX4L	CG10396	FBtr0086089	FBgn0033020	176	530	0	0.9427	0	23.7719	0.436474	0.929462	0	2.15981	0
Hmgcl-RA	Hmgcl	CG10399	FBtr0079351	FBgn0031877	323	971	3.09925	0.257276	5.20854	2.53795	0.591578	4.3568	1.22116	0.434898	1.1955
CG10405-RB	CG10405	CG10405	FBtr0110773	FBgn0038431	268	806	0	0	0.392175	0.597607	0	0.193741	0	#DIV/0!	2.02422
mRpS33-RA	mRpS33	CG10406	FBtr0083316	FBgn0038426	113	341	22.9454	104.029	31.9801	26.0515	61.8282	15.0701	0.88077	1.68254	2.12209
CG10407-RA	CG10407	CG10407	FBtr0083237	FBgn0038395	259	779	7.72624	43.6135	6.49229	25.6522	3.54624	4.00388	0.301192	12.2985	1.6215
CRAT-RD	CRAT	CG1041	FBtr0344293	FBgn0037440	662	1988	22.101	12.9432	23.2936	8.13051	5.20323	9.55813	2.71828	2.48752	2.43704
CG10413-RA	CG10413	CG10413	FBtr0081080	FBgn0032689	941	2825	18.5356	25.8216	30.2107	6.56878	8.27155	8.37629	2.82177	3.12174	3.60669
Atac2-RA	Atac2	CG10414	FBtr0081079	FBgn0032691	774	2324	0.776946	3.11732	1.49614	1.7934	3.11053	1.88695	0.433225	1.00218	0.792885
TfIIEﾎｱ-RA	TfIIEﾎｱ	CG10415	FBtr0076108	FBgn0015828	429	1289	0.933862	4.65133	3.92358	8.95402	16.8904	12.2432	0.104295	0.275384	0.320471
CG10417-RB	CG10417	CG10417	FBtr0086092	FBgn0033021	662	1988	32.3946	73.6377	29.1766	12.7637	18.2112	10.0924	2.53804	4.04354	2.89095
CG10418-RA	CG10418	CG10418	FBtr0075954	FBgn0036277	95	287	12.5827	37.4288	19.8247	23.1726	44.1298	21.7145	0.543001	0.848152	0.912967
Gem2-RB	Gem2	CG10419	FBtr0330093	FBgn0036850	245	737	4.08327	5.08444	4.28892	3.77698	3.47741	1.89656	1.08109	1.46213	2.26142
Sil1-RA	Sil1	CG10420	FBtr0084870	FBgn0039296	429	1289	8.87169	15.8921	6.98887	5.23946	6.1626	5.39553	1.69325	2.57879	1.29531
bam-RA	bam	CG10422	FBtr0084869	FBgn0000158	442	1328	0	0	0	0.457273	0.042403	0.174221	0	0	0
RpS27-RB	RpS27	CG10423	FBtr0304693	FBgn0039300	84	254	324.633	207.524	301.16	936.026	860.657	1244.95	0.34682	0.241123	0.241905
Naxd-RA	Naxd	CG10424	FBtr0075033	FBgn0036848	300	902	15.3471	8.86263	13.3166	9.77975	8.10929	8.53136	1.56928	1.0929	1.5609
CG10425-RA	CG10425	CG10425	FBtr0084867	FBgn0039304	336	1010	13.1101	14.5932	16.1176	6.16159	2.93577	5.31342	2.12772	4.97082	3.03338
INPP5E-RB	INPP5E	CG10426	FBtr0333356	FBgn0036273	747	2243	1.61001	8.57592	1.55017	3.39184	14.8922	2.92012	0.474671	0.575867	0.530857
CG10428-RA	CG10428	CG10428	FBtr0081132	FBgn0032724	585	1757	1.37023	1.84838	1.34929	6.95922	9.16096	6.57939	0.196895	0.201767	0.205078
CG10431-RA	CG10431	CG10431	FBtr0081134	FBgn0032730	762	2288	0	1.20104	0.483534	0.516289	0.960503	0.605019	0	1.25042	0.799205
CG10433-RA	CG10433	CG10433	FBtr0071690	FBgn0034638	127	383	367.725	119.364	2871.66	194.153	33.9092	638.066	1.89399	3.52009	4.50057
CG10435-RA	CG10435	CG10435	FBtr0081820	FBgn0037539	495	1487	3.64282	8.56798	3.82628	9.6775	19.0585	10.784	0.376421	0.449562	0.354811
Obp69a-RA	Obp69a	CG10436	FBtr0075955	FBgn0011279	148	446	6.74747	0.560124	1.77182	3.05042	0.110318	1.66654	2.21198	5.07738	1.06318
dos-RA	dos	CG1044	FBtr0072926	FBgn0016794	878	2636	6.62153	5.11761	9.4732	5.45963	5.25701	5.62955	1.21282	0.973485	1.68276
twz-RA	twz	CG10440	FBtr0071692	FBgn0034636	338	1016	5.33156	24.0964	0.155558	4.75326	17.9333	2.92317	1.12167	1.34366	0.0532153
Lar-RB	Lar	CG10443	FBtr0112800	FBgn0000464	2011	6035	8.87602	30.8389	1.93794	14.7119	14.91	6.86322	0.603322	2.06834	0.282365
CG10444-RA	CG10444	CG10444	FBtr0086305	FBgn0034494	587	1763	29.7011	13.8865	273.422	8.47689	4.51931	40.0685	3.50377	3.07271	6.82385
CG10445-RD	CG10445	CG10445	FBtr0304704	FBgn0037531	945	2837	0	0.264169	0.668509	0.30707	0.0797442	0.347134	0	3.3127	1.9258
Sidpn-RA	Sidpn	CG10446	FBtr0081141	FBgn0032741	507	1523	15.0172	15.7467	1.03773	8.04854	36.2052	4.87165	1.86583	0.43493	0.213015
Nf-YB-RA	Nf-YB	CG10447	FBtr0081289	FBgn0032816	156	470	10.2447	48.3685	12.442	5.59963	5.89569	4.71946	1.82953	8.20404	2.63631
Catsup-RA	Catsup	CG10449	FBtr0081143	FBgn0002022	449	1349	36.1392	33.7038	51.6668	12.5683	4.74749	14.4865	2.87542	7.09928	3.56655
CG10459-RA	CG10459	CG10459	FBtr0088468	FBgn0033440	322	968	0	0	0	1.21606	0.32138	0.438045	0	0	0
zen-RA	zen	CG1046	FBtr0081670	FBgn0004053	353	1061	0	0	0.14896	0.105164	0	0	0	#DIV/0!	#DIV/0!
cer-RA	cer	CG10460	FBtr0086551	FBgn0034443	79	239	118.36	52.2626	78.6927	43.9226	23.4106	52.6518	2.69474	2.23243	1.49459
CG10462-RC	CG10462	CG10462	FBtr0100352	FBgn0032815	776	2330	3.09978	1.60825	7.05444	4.44581	4.20526	8.19889	0.697236	0.382438	0.860414
CG10463-RA	CG10463	CG10463	FBtr0081290	FBgn0032819	604	1814	5.3087	3.30517	3.22366	2.16175	2.30461	2.58699	2.45574	1.43415	1.24611
CG10465-RA	CG10465	CG10465	FBtr0086094	FBgn0033017	301	905	30.5925	52.7235	33.5303	19.7376	15.3779	13.7459	1.54996	3.42853	2.4393
CG10466-RA	CG10466	CG10466	FBtr0081291	FBgn0032822	154	464	6.48571	11.8447	4.08741	5.0358	6.56821	5.70587	1.28792	1.80334	0.716352
CG10467-RA	CG10467	CG10467	FBtr0077063	FBgn0035679	364	1094	20.9061	8.90567	21.67	8.74475	1.85954	4.94132	2.3907	4.78918	4.38547
CG10469-RA	CG10469	CG10469	FBtr0077064	FBgn0035678	267	803	0	0.311103	0	9.03268	4.03626	8.19054	0	0.0770769	0
CG10470-RA	CG10470	CG10470	FBtr0081146	FBgn0032746	183	551	57.8935	53.9529	54.212	23.2525	8.64978	12.3528	2.48978	6.23748	4.38864
CG10472-RA	CG10472	CG10472	FBtr0077066	FBgn0035670	290	872	2.07067	15.7567	13.956	121.498	4.25795	4.34795	0.0170428	3.70053	3.20978
Acn-RC	Acn	CG10473	FBtr0336842	FBgn0263198	739	2219	15.1893	24.4299	10.1851	27.3415	13.6113	12.7012	0.555538	1.79483	0.801899
CG10474-RA	CG10474	CG10474	FBtr0086561	FBgn0034427	341	1025	0	0	0	0	0	0.0235645	#DIV/0!	#DIV/0!	0
Jon65Ai-RA	Jon65Ai	CG10475	FBtr0077067	FBgn0035667	262	788	0	1.90215	0.200567	12.3172	0	0	0	#DIV/0!	#DIV/0!
AANATL5-RA	AANATL5	CG10476	FBtr0086562	FBgn0034426	222	668	0	0	0	0	0	0	#DIV/0!	#DIV/0!	#DIV/0!
CG10477-RB	CG10477	CG10477	FBtr0346804	FBgn0035661	272	818	0.735788	3.05398	3.09138	6.86089	0.0772967	0.221349	0.107244	39.5098	13.9661
ﾎｱKap4-RA	ﾎｱKap4	CG10478	FBtr0077069	FBgn0035657	442	1328	0	0	0	1.26561	0.00665269	0.0596374	0	0	0
CG10479-RB	CG10479	CG10479	FBtr0332041	FBgn0035656	379	1139	8.45477	3.72859	27.6131	7.32727	3.19855	15.673	1.15388	1.16571	1.76182
zen2-RA	zen2	CG1048	FBtr0081671	FBgn0004054	252	758	0	0	0	0.0237509	0	0	0	#DIV/0!	#DIV/0!
Rcc1-RC	Rcc1	CG10480	FBtr0077076	FBgn0002638	547	1643	7.32653	15.5089	5.29067	11.6414	14.5745	8.21038	0.629351	1.06412	0.644387
CG10481-RB	CG10481	CG10481	FBtr0081312	FBgn0032827	646	1940	0	0	0	0.0663558	0	0.0149391	0	#DIV/0!	0
CG10483-RA	CG10483	CG10483	FBtr0077077	FBgn0035649	671	2015	2.98697	12.5218	1.64714	7.46189	19.9388	4.96386	0.400296	0.628011	0.331825
CG10486-RC	CG10486	CG10486	FBtr0305273	FBgn0035647	327	983	0	0	0	0.14061	0.00423761	0.00844172	0	0	0
eyg-RC	eyg	CG10488	FBtr0339921	FBgn0000625	670	2012	1.19657	2.48325	0.628416	2.90639	6.19937	2.93814	0.411703	0.400565	0.213882
DNApol-ﾎｵ58-RA	DNApol-ﾎｵ58	CG10489	FBtr0077081	FBgn0035644	525	1577	0	0.158412	0.20044	0.434143	0.0594722	0.0829319	0	2.66363	2.41692
Pcyt1-RC	Pcyt1	CG1049	FBtr0072741	FBgn0041342	526	1580	41.9026	75.419	50.1148	27.9373	52.4448	30.9142	1.49988	1.43806	1.62109
vn-RA	vn	CG10491	FBtr0077082	FBgn0003984	623	1871	3.21686	2.40336	0.844717	1.44072	0.816571	1.25627	2.23282	2.94323	0.672401
CG10492-RA	CG10492	CG10492	FBtr0081148	FBgn0032748	810	2432	5.93955	8.52577	3.83419	5.96196	10.9945	5.1538	0.996241	0.775461	0.743954
Phlpp-RA	Phlpp	CG10493	FBtr0081149	FBgn0032749	954	2864	0	0	0.0551839	0.0947574	0.0244777	0.0944759	0	0	0.584105
CG10494-RB	CG10494	CG10494	FBtr0071699	FBgn0034634	444	1334	0.45118	3.37082	1.65866	1.36738	4.69412	1.93966	0.32996	0.718095	0.855129
CG10495-RA	CG10495	CG10495	FBtr0081150	FBgn0032750	396	1190	2.52888	3.56879	1.99218	2.68882	3.4122	2.17342	0.940518	1.04589	0.916611
TAF1C-like-RA	TAF1C-like	CG10496	FBtr0071701	FBgn0034631	842	2528	1.90467	3.75514	1.75052	1.86336	1.80503	1.60539	1.02217	2.08037	1.0904
Sdc-RG	Sdc	CG10497	FBtr0305897	FBgn0010415	75	227	185.6	177.182	153.173	129.29	477.291	303.054	1.43553	0.371224	0.505432
Cdk2-RA	Cdk2	CG10498	FBtr0083921	FBgn0004107	314	944	3.82547	5.82197	1.17196	5.72709	4.30616	2.28052	0.667961	1.35201	0.513898
amd-RB	amd	CG10501	FBtr0081153	FBgn0000075	510	1532	5.10729	2.44597	1.34113	2.64098	0.614158	0.949039	1.93386	3.98264	1.41314
Ilk-RA	Ilk	CG10504	FBtr0078305	FBgn0028427	448	1346	34.4311	13.9199	30.4116	12.1118	8.80489	15.7241	2.84277	1.58093	1.93408
CG10505-RA	CG10505	CG10505	FBtr0071619	FBgn0034612	1312	3938	0.152838	0.190311	0.0802675	0.190662	0.104336	0.103923	0.801617	1.82403	0.772373
GlnRS-RA	GlnRS	CG10506	FBtr0084866	FBgn0027090	778	2336	16.4897	12.0844	9.94557	8.62955	7.25827	9.68152	1.91084	1.66491	1.02727
CG10508-RL	CG10508	CG10508	FBtr0331854	FBgn0037060	445	1337	13.0549	53.999	12.2938	21.5478	84.5974	21.5817	0.605857	0.638306	0.569641
CG10510-RA	CG10510	CG10510	FBtr0078310	FBgn0037059	523	1571	0	0	0	1.78221	0.00579614	0.0288661	0	0	0
CG10512-RD	CG10512	CG10512	FBtr0078300	FBgn0037057	361	1085	42.7137	3.22342	24.3261	13.0378	5.53683	16.5328	3.27614	0.582179	1.47139
CG10513-RB	CG10513	CG10513	FBtr0114505	FBgn0039311	422	1268	17.5626	8.66867	170.386	26.4424	5.69956	110.374	0.664182	1.52094	1.54371
CG10514-RA	CG10514	CG10514	FBtr0084864	FBgn0039312	413	1241	5.3349	7.64947	73.2287	5.78888	0.502685	11.354	0.921578	15.2172	6.44957
CG10516-RA	CG10516	CG10516	FBtr0075512	FBgn0036549	342	1028	15.2225	4.3742	5.84219	10.6607	6.88145	7.20786	1.4279	0.635651	0.810531
tub-RC	tub	CG10520	FBtr0302338	FBgn0003882	462	1388	6.93803	7.73924	6.49039	10.1515	18.1661	15.5372	0.68345	0.426026	0.417733
NetB-RD	NetB	CG10521	FBtr0302018	FBgn0015774	793	2381	11.1224	37.1418	1.85859	4.72944	12.4657	4.56563	2.35174	2.97953	0.407084
sti-RA	sti	CG10522	FBtr0075970	FBgn0002466	1854	5564	0.108173	0.0897971	0.0852156	0.245038	0.021493	0.0988064	0.441453	4.17796	0.86245
park-RC	park	CG10523	FBtr0078319	FBgn0041100	482	1448	6.65054	4.83068	4.14763	6.81808	8.66628	6.86708	0.975428	0.557412	0.603988
CG10527-RA	CG10527	CG10527	FBtr0071541	FBgn0034583	296	890	361.125	268.902	583.352	76.2123	50.307	149.316	4.7384	5.34523	3.90683
fs(2)ltoPP43-RB	fs(2)ltoPP43	CG10528	FBtr0081317	FBgn0004811	241	725	12.4526	16.5395	12.4257	5.4152	11.6816	5.21884	2.29956	1.41586	2.38094
Lcp65Ae-RA	Lcp65Ae	CG10529	FBtr0077056	FBgn0020640	99	299	2.01296	0	0.528584	0	0	0	#DIV/0!	#DIV/0!	#DIV/0!
Lcp65Ag1-RA	Lcp65Ag1	CG10530	FBtr0077058	FBgn0020638	105	317	36.0745	7.88061	5.98284	0.902028	0.174759	0.425498	39.9926	45.0943	14.0608
Cht9-RA	Cht9	CG10531	FBtr0071542	FBgn0034582	368	1106	0	0.451746	0.285799	1.56846	0.0345871	0.0602881	0	13.0611	4.74055
Lcp65Af-RA	Lcp65Af	CG10533	FBtr0077057	FBgn0020639	100	302	1.99296	0	0	0	0	0.0385326	#DIV/0!	#DIV/0!	0
Lcp65Ag2-RA	Lcp65Ag2	CG10534	FBtr0077059	FBgn0020637	105	317	36.0745	8.66867	5.98284	3.43535	0.480684	1.19696	10.501	18.034	4.99836
Elp1-RA	Elp1	CG10535	FBtr0082420	FBgn0037926	1252	3758	5.28522	5.1851	3.65888	5.88901	5.65233	5.42581	0.897471	0.917339	0.674346
Rdl-RF	Rdl	CG10537	FBtr0333835	FBgn0004244	606	1820	5.9526	18.393	0.521033	52.6574	94.2567	33.4624	0.113044	0.195137	0.0155707
CdGAPr-RD	CdGAPr	CG10538	FBtr0332179	FBgn0032821	1843	5531	2.50282	5.41997	12.8586	3.69266	4.43821	7.70389	0.677782	1.22121	1.66911
S6k-RB	S6k	CG10539	FBtr0333264	FBgn0283472	490	1472	39.6615	15.4438	24.8022	28.3532	33.8405	50.7104	1.39884	0.456369	0.489094
cpa-RA	cpa	CG10540	FBtr0071532	FBgn0034577	286	860	21.6955	24.1101	38.2252	17.3326	17.1834	26.0616	1.25171	1.40311	1.46673
Tektin-C-RA	Tektin-C	CG10541	FBtr0077115	FBgn0035638	421	1265	0	0.78993	0.124938	3.13289	1.0276	0.157468	0	0.76871	0.793419
Bre1-RB	Bre1	CG10542	FBtr0344538	FBgn0086694	1044	3134	4.03298	6.53633	2.62234	4.69947	13.6416	4.83809	0.858178	0.479145	0.542021
CG10543-RA	CG10543	CG10543	FBtr0071524	FBgn0034570	1634	4904	5.15471	6.928	5.28541	8.82943	16.9114	12.429	0.583811	0.409665	0.425248
Gﾎｲ13F-RG	Gﾎｲ13F	CG10545	FBtr0331597	FBgn0001105	340	1022	108.361	183.573	122.324	116.18	404.276	302.171	0.932695	0.454078	0.404816
Cralbp-RA	Cralbp	CG10546	FBtr0077117	FBgn0035636	324	974	11.7409	3.07781	3.08304	3.36429	0.644643	2.41253	3.48985	4.77444	1.27793
CG10550-RB	CG10550	CG10550	FBtr0084857	FBgn0039321	425	1277	144.224	12.1289	219.805	53.5761	14.2286	60.1933	2.69194	0.852426	3.65165
CG10553-RA	CG10553	CG10553	FBtr0084853	FBgn0039324	414	1244	16.9338	12.8522	12.8318	17.1096	2.04677	9.22257	0.989723	6.27929	1.39134
CG10555-RB	CG10555	CG10555	FBtr0343353	FBgn0030034	926	2780	6.71155	15.5461	4.37755	2.62821	6.44557	2.38416	2.55366	2.4119	1.8361
CG10559-RB	CG10559	CG10559	FBtr0289942	FBgn0039323	415	1247	0.965316	0.400666	1.39416	0.619012	0.258843	0.522607	1.55944	1.54791	2.6677
5-HT2A-RH	5-HT2A	CG1056	FBtr0339397	FBgn0087012	917	2753	2.6235	5.44458	2.12413	8.85147	7.56666	6.59736	0.296391	0.719549	0.321966
CG10560-RA	CG10560	CG10560	FBtr0084852	FBgn0039325	414	1244	5.80586	17.2702	26.5528	8.28501	3.01828	13.8906	0.700767	5.72187	1.91156
CG10561-RA	CG10561	CG10561	FBtr0081155	FBgn0002036	504	1514	3.18031	10.3952	1.56585	11.2875	18.2481	7.45555	0.281755	0.56966	0.210025
CG10562-RA	CG10562	CG10562	FBtr0084851	FBgn0039326	405	1217	21.7604	21.3482	40.7778	8.59488	2.14979	7.14417	2.53179	9.9304	5.70785
l(2)37Cd-RA	l(2)37Cd	CG10563	FBtr0081156	FBgn0086445	480	1442	1.25217	1.90567	1.42483	2.10973	3.29117	2.13602	0.593519	0.579023	0.667049
Ac78C-RC	Ac78C	CG10564	FBtr0305501	FBgn0024150	1222	3668	0.820439	2.24752	0.43088	1.9098	3.14812	1.37725	0.429595	0.713925	0.312856
CG10565-RA	CG10565	CG10565	FBtr0078323	FBgn0037051	646	1940	14.5815	19.3156	15.4788	22.217	38.6612	27.8163	0.656321	0.499612	0.556465
ICA69-RB	ICA69	CG10566	FBtr0305500	FBgn0037050	411	1235	11.6963	35.6012	1.66365	8.09601	26.601	5.90241	1.4447	1.33834	0.281859
MED31-RE	MED31	CG1057	FBtr0345249	FBgn0037262	199	599	11.0528	24.6062	24.5381	26.9891	35.9061	24.7916	0.409527	0.685293	0.989777
CG10570-RA	CG10570	CG10570	FBtr0081122	FBgn0040992	73	221	1187.41	759.62	689.398	1230.71	458.619	929.817	0.964814	1.65632	0.741434
ara-RB	ara	CG10571	FBtr0300551	FBgn0015904	709	2129	1.97892	3.52018	0.296941	0.936076	1.6548	0.466036	2.11406	2.12725	0.637162
Cdk8-RA	Cdk8	CG10572	FBtr0076369	FBgn0015618	454	1364	7.50137	6.41022	4.17132	2.28025	2.74445	1.64147	3.28971	2.3357	2.54121
ko-RB	ko	CG10573	FBtr0333449	FBgn0020294	1049	3149	1.52905	3.41126	6.57482	3.84012	3.33531	3.63181	0.398179	1.02277	1.81034
I-2-RA	I-2	CG10574	FBtr0076370	FBgn0028429	205	617	40.9704	68.8308	36.3738	26.8733	56.5356	32.3741	1.52458	1.21748	1.12354
Ppat-Dpck-RA	Ppat-Dpck	CG10575	FBtr0077120	FBgn0035632	518	1556	18.18	8.34859	9.14151	8.00804	5.51524	10.4083	2.27022	1.51373	0.878291
CG10576-RA	CG10576	CG10576	FBtr0077121	FBgn0035630	391	1175	68.6393	39.3326	32.5509	59.2098	36.7745	39.9417	1.15926	1.06956	0.814959
DnaJ-1-RA	DnaJ-1	CG10578	FBtr0077123	FBgn0263106	334	1004	106.107	180.395	81.3846	32.9281	31.5523	20.7812	3.22239	5.71731	3.91625
Eip63E-RJ	Eip63E	CG10579	FBtr0110924	FBgn0005640	509	1529	18.1074	36.4348	20.1564	8.52613	26.7087	8.69715	2.12375	1.36416	2.31758
rpk-RA	rpk	CG1058	FBtr0078859	FBgn0022981	562	1688	0	0.59198	0.187259	1.47283	0.0677766	0.21841	0	8.73428	0.857373
fng-RA	fng	CG10580	FBtr0078267	FBgn0011591	412	1238	29.6562	9.28232	159.451	13.7845	3.91	40.9973	2.15142	2.374	3.8893
CG10581-RA	CG10581	CG10581	FBtr0078326	FBgn0037046	189	569	6.34665	17.1227	17.7768	7.41497	18.6241	12.5884	0.855925	0.919381	1.41215
Sin-RA	Sin	CG10582	FBtr0078288	FBgn0028402	486	1460	3.71018	3.25102	2.70628	5.54489	5.05055	4.6155	0.669118	0.643696	0.586346
Sse-RA	Sse	CG10583	FBtr0077125	FBgn0035627	634	1904	0.31611	0.131206	0.166015	0.540641	0.0507248	0.450125	0.584696	2.58661	0.36882
CG10584-RA	CG10584	CG10584	FBtr0078327	FBgn0037045	274	824	0.73043	5.76031	3.06887	5.95749	16.0288	7.90872	0.122607	0.359372	0.388036
Pdss2-RB	Pdss2	CG10585	FBtr0345136	FBgn0037044	448	1346	7.60168	3.34077	2.93549	6.92745	20.6864	7.95111	1.09733	0.161496	0.369192
Sems-RA	Sems	CG10586	FBtr0078335	FBgn0037036	275	827	0	0	0	2.8922	0.0113691	0.0113241	0	0	0
CG10587-RA	CG10587	CG10587	FBtr0078333	FBgn0037039	276	830	0	0	0	1.43602	0	0	0	#DIV/0!	#DIV/0!
CG10588-RB	CG10588	CG10588	FBtr0346528	FBgn0037037	1058	3176	0	0.235972	0.0497628	0.5303	0	0.0160975	0	#DIV/0!	3.09134
CG10589-RA	CG10589	CG10589	FBtr0078266	FBgn0037035	386	1160	0.518857	0	0.136247	6.57264	0.014709	0.0219763	0.078942	0	6.19973
Karyﾎｲ3-RB	Karyﾎｲ3	CG1059	FBtr0336462	FBgn0087013	1105	3317	54.254	37.6568	48.8863	37.0348	37.9828	51.0471	1.46495	0.991417	0.95767
TM9SF3-RA	TM9SF3	CG10590	FBtr0077127	FBgn0035622	592	1778	23.6958	35.4069	37.4227	6.52903	5.44893	6.46387	3.62931	6.49795	5.78952
CG10591-RA	CG10591	CG10591	FBtr0077128	FBgn0035621	312	938	0	0	0.673973	1.17749	0.00933852	0	0	0	#DIV/0!
Alp10-RA	Alp10	CG10592	FBtr0077129	FBgn0035619	524	1574	0	1.90456	3.61479	5.33274	0.0344388	0.125776	0	55.3029	28.7398
Acer-RA	Acer	CG10593	FBtr0079685	FBgn0016122	630	1892	201.367	23.1066	20.0482	44.8977	8.02427	21.1683	4.48502	2.87959	0.947087
spo-RA	spo	CG10594	FBtr0077130	FBgn0003486	543	1631	0	0	0	0.121849	0	0	0	#DIV/0!	#DIV/0!
Msr-110-RC	Msr-110	CG10596	FBtr0077133	FBgn0015766	625	1877	835.634	195.647	1267.49	276.469	52.8162	278.613	3.02252	3.70429	4.54929
CG10597-RB	CG10597	CG10597	FBtr0273221	FBgn0030832	200	602	0	0	0	0	0	0	#DIV/0!	#DIV/0!	#DIV/0!
CG10598-RA	CG10598	CG10598	FBtr0074400	FBgn0003057	173	521	0	0	0	0.0609247	0	0.0548654	0	#DIV/0!	0
CG10600-RC	CG10600	CG10600	FBtr0331194	FBgn0032717	1376	4130	4.80916	7.25856	3.82679	9.51052	17.5393	12.2046	0.505668	0.413846	0.313553
mirr-RC	mirr	CG10601	FBtr0330077	FBgn0014343	682	2048	1.17554	4.14733	0.540198	2.40786	11.8703	2.95455	0.488208	0.349388	0.182836
CG10602-RC	CG10602	CG10602	FBtr0089315	FBgn0032721	613	1841	30.4043	13.7052	22.8356	17.6215	11.2525	14.8718	1.72541	1.21798	1.5355
mRpL13-RA	mRpL13	CG10603	FBtr0089318	FBgn0032720	178	536	29.1954	63.386	24.1788	21.0156	30.7152	11.9514	1.38922	2.06367	2.0231
bsh-RB	bsh	CG10604	FBtr0089320	FBgn0000529	429	1289	1.86772	10.4655	0.367835	2.01983	5.48348	0.949229	0.924695	1.90855	0.38751
caup-RA	caup	CG10605	FBtr0075909	FBgn0015919	693	2081	2.31379	3.24124	0.455685	0.817911	2.25102	0.488727	2.8289	1.4399	0.932391
Orco-RB	Orco	CG10609	FBtr0113193	FBgn0037324	486	1460	5.35915	5.64651	0	1.18489	2.67819	0.441732	4.52293	2.10833	0
ECSIT-RA	ECSIT	CG10610	FBtr0078647	FBgn0028436	409	1229	6.36645	9.14703	3.47214	5.20948	12.3863	6.04464	1.22209	0.738476	0.574417
Or83a-RA	Or83a	CG10612	FBtr0078797	FBgn0037322	453	1361	0	0	0	0.0163047	0	0	0	#DIV/0!	#DIV/0!
CG10616-RC	CG10616	CG10616	FBtr0346569	FBgn0036286	492	1478	12.6239	7.26797	9.08928	12.5776	6.73994	8.65547	1.00368	1.07834	1.05012
Syt12-RA	Syt12	CG10617	FBtr0073767	FBgn0261085	787	2363	0.509415	5.18026	0.267536	1.97069	5.59498	1.21077	0.258496	0.925877	0.220963
CHKov1-RE	CHKov1	CG10618	FBtr0113352	FBgn0045761	410	1232	2.93121	7.90812	47.5936	37.5228	2.79964	68.7574	0.078118	2.82469	0.692196
tup-RA	tup	CG10619	FBtr0081111	FBgn0003896	534	1604	2.2514	6.38556	0.295598	2.88261	7.60252	1.74702	0.781027	0.839927	0.169202
Tsf2-RA	Tsf2	CG10620	FBtr0075966	FBgn0036299	819	2459	16.6439	7.72101	25.9662	6.99168	3.58532	9.71144	2.38053	2.15351	2.67377
CG10621-RA	CG10621	CG10621	FBtr0081191	FBgn0032726	331	995	35.0841	11.2982	29.7032	6.44721	1.88904	7.19605	5.44175	5.98091	4.12771
ScsﾎｲG-RC	ScsﾎｲG	CG10622	FBtr0344756	FBgn0029118	416	1250	15.408	14.1895	16.8162	6.93422	8.32608	8.63568	2.22202	1.70423	1.94729
CG10623-RB	CG10623	CG10623	FBtr0344844	FBgn0032727	331	995	15.1225	9.54069	22.3966	9.86981	5.4495	11.3445	1.53219	1.75075	1.97422
sinu-RA	sinu	CG10624	FBtr0077136	FBgn0010894	247	743	8.91065	5.71583	18.2934	10.055	6.19349	14.5848	0.88619	0.922877	1.25428
frm-RA	frm	CG10625	FBtr0077137	FBgn0035612	268	806	0.746742	0	0.588263	0.461811	0.127075	0.329992	1.61699	0	1.78266
Lkr-RA	Lkr	CG10626	FBtr0077149	FBgn0035610	542	1628	1.47881	1.22759	1.65036	0.970138	0.702381	0.68254	1.52433	1.74776	2.41797
nst-RA	nst	CG10627	FBtr0075967	FBgn0036298	549	1649	7.66486	9.2412	4.7922	4.88112	4.3584	4.33662	1.57031	2.12032	1.10505
CG10628-RA	CG10628	CG10628	FBtr0081323	FBgn0032818	383	1151	1.04583	10.418	3.15819	9.08471	27.3388	11.9129	0.11512	0.381071	0.265106
Itpr-RC	Itpr	CG1063	FBtr0344265	FBgn0010051	2828	8486	7.58903	8.18391	3.03578	3.69184	3.53856	2.81907	2.05562	2.31278	1.07687
blanks-RA	blanks	CG10630	FBtr0077152	FBgn0035608	324	974	0	0.256484	0.162266	3.3801	0.261265	0.252346	0	0.981701	0.643028
CG10631-RA	CG10631	CG10631	FBtr0081324	FBgn0032817	3781	11345	0.954935	4.05166	1.11448	2.61733	3.88798	2.19467	0.36485	1.0421	0.507811
sowah-RH	sowah	CG10632	FBtr0300887	FBgn0036302	527	1583	11.4063	7.25932	14.4768	5.13774	11.5447	5.47414	2.22011	0.628799	2.64458
Ir64a-RA	Ir64a	CG10633	FBtr0077153	FBgn0035604	859	2579	0.233375	0	0	0.00860739	0.0077821	0	27.1133	0	#DIV/0!
Pfdn4-RA	Pfdn4	CG10635	FBtr0077154	FBgn0035603	138	416	68.0002	159.137	47.8699	25.0699	43.0212	24.1786	2.71243	3.69904	1.97985
Nak-RD	Nak	CG10637	FBtr0340325	FBgn0015772	1488	4466	8.35562	14.0402	23.6044	9.71249	7.25406	10.7076	0.860297	1.9355	2.20445
CG10638-RA	CG10638	CG10638	FBtr0089321	FBgn0036290	317	953	30.3148	72.0873	108.626	16.4711	32.4126	53.1348	1.84049	2.22405	2.04435
L2HGDH-RB	L2HGDH	CG10639	FBtr0340323	FBgn0032729	455	1367	19.3727	10.0511	22.5451	12.4149	13.6553	19.6186	1.56044	0.736059	1.14917
Snr1-RA	Snr1	CG1064	FBtr0078682	FBgn0011715	370	1112	11.9076	27.8571	15.0656	11.378	28.3646	14.9277	1.04654	0.982108	1.00924
Uev1A-RC	Uev1A	CG10640	FBtr0345026	FBgn0035601	145	437	188.688	233.237	116.455	78.4998	115.409	76.0579	2.40368	2.02096	1.53114
Swip-1-RB	Swip-1	CG10641	FBtr0340322	FBgn0032731	217	653	116.135	152.644	101.895	21.5026	39.1787	30.7449	5.40096	3.89609	3.31422
Klp64D-RA	Klp64D	CG10642	FBtr0077157	FBgn0004380	677	2033	13.0263	43.9911	6.45247	7.01599	25.3255	7.38574	1.85666	1.73703	0.873639
lama-RA	lama	CG10645	FBtr0077161	FBgn0016031	658	1976	7.31021	3.91917	39.9116	12.6823	5.08188	50.9607	0.576411	0.771205	0.783184
CG10646-RA	CG10646	CG10646	FBtr0075972	FBgn0036292	383	1151	11.5041	14.3248	8.65068	2.56421	4.35238	2.93368	4.48641	3.29125	2.94875
Rbm13-RA	Rbm13	CG10648	FBtr0071255	FBgn0030067	343	1031	13.4269	5.33069	5.21201	10.3501	4.45182	6.60691	1.29726	1.19742	0.788873
Scsﾎｱ1-RA	Scsﾎｱ1	CG1065	FBtr0073151	FBgn0004888	328	986	264.922	312.649	168.466	143.302	188.384	117.388	1.84869	1.65964	1.43512
CG10650-RA	CG10650	CG10650	FBtr0081183	FBgn0046302	425	1277	0.471319	5.8688	3.96045	5.64266	0.664001	0.314317	0.0835278	8.83855	12.6002
CG10651-RA	CG10651	CG10651	FBtr0081378	FBgn0032853	316	950	0	0	0	0.988445	0	0.0197808	0	#DIV/0!	0
RpL30-RB	RpL30	CG10652	FBtr0081181	FBgn0086710	111	335	343.158	180.464	194.374	667.562	359.128	407.955	0.514047	0.502506	0.476459
hook-RA	hook	CG10653	FBtr0081180	FBgn0001202	679	2039	21.5482	33.9377	23.2535	13.1115	49.042	13.3999	1.64346	0.692012	1.73535
CG10654-RB	CG10654	CG10654	FBtr0332644	FBgn0036294	412	1238	2.43083	8.67695	12.7663	7.12349	10.2614	10.2762	0.341242	0.845593	1.24232
l(2)37Bb-RA	l(2)37Bb	CG10655	FBtr0081177	FBgn0002021	515	1547	7.78118	12.5957	6.43629	9.12726	9.54519	9.05666	0.852521	1.31959	0.710669
CG10657-RA	CG10657	CG10657	FBtr0075975	FBgn0036289	334	1004	55.7513	11.6945	13.5379	17.3547	2.53608	6.04939	3.21245	4.61128	2.23789
Hf-RA	Hf	CG10658	FBtr0081306	FBgn0014000	214	644	160.749	6.98242	26.0139	55.0468	8.06698	42.3404	2.92023	0.865556	0.614398
AANATL3-RA	AANATL3	CG10659	FBtr0081350	FBgn0032839	222	668	0	0.74795	0.70979	0.875547	0	0.047786	0	#DIV/0!	14.8535
CG10660-RA	CG10660	CG10660	FBtr0075976	FBgn0036288	487	1463	2.46838	1.70756	8.42627	7.84849	1.71525	8.94605	0.314504	0.995515	0.941899
CG10663-RD	CG10663	CG10663	FBtr0346570	FBgn0036287	748	2246	0.803928	0.111227	4.43319	0.706652	0.142329	1.52477	1.13766	0.781479	2.90745
COX4-RA	COX4	CG10664	FBtr0081300	FBgn0032833	182	548	779.801	1441	540.473	474.946	1002.34	486.897	1.64187	1.43764	1.11004
Orc1-RA	Orc1	CG10667	FBtr0088959	FBgn0286788	924	2774	0.43394	0.45028	0.854614	0.725675	0.101918	0.260132	0.597981	4.41807	3.28531
CG10669-RA	CG10669	CG10669	FBtr0084848	FBgn0039329	933	2801	0.859513	2.14051	1.46705	1.78661	1.67538	1.2366	0.481087	1.27763	1.18635
Gen-RA	Gen	CG10670	FBtr0077176	FBgn0263831	726	2180	0.276089	0.458377	0.144997	0.635046	0.821485	0.910619	0.434755	0.557985	0.159229
Fitm-RA	Fitm	CG10671	FBtr0077178	FBgn0035586	423	1271	25.5714	17.6895	27.2323	9.95655	11.0976	20.404	2.5683	1.59399	1.33465
CG10672-RA	CG10672	CG10672	FBtr0077179	FBgn0035588	317	953	60.6295	52.165	28.6905	29.5136	39.2835	34.0454	2.05429	1.32791	0.842714
Prpk-RA	Prpk	CG10673	FBtr0077180	FBgn0035590	224	674	9.82287	12.2313	6.56573	10.0887	16.1108	10.2411	0.973652	0.759199	0.641114
CG10674-RA	CG10674	CG10674	FBtr0077181	FBgn0035592	108	326	49.8485	52.875	53.3286	36.9808	44.419	29.7048	1.34796	1.19037	1.79529
CHKov2-RA	CHKov2	CG10675	FBtr0084849	FBgn0039328	409	1229	10.774	8.94376	63.3987	10.9044	2.86628	24.5843	0.988037	3.12034	2.57883
Nedd8-RA	Nedd8	CG10679	FBtr0081192	FBgn0032725	84	254	90.0442	100.32	62.2231	43.2826	55.4165	46.5993	2.08038	1.81028	1.33528
CG10680-RA	CG10680	CG10680	FBtr0081303	FBgn0032836	251	755	365.908	19.1911	39.3547	151.489	19.1776	78.5026	2.41541	1.0007	0.501317
CG10681-RA	CG10681	CG10681	FBtr0075957	FBgn0036291	212	638	6.60364	9.00589	6.68849	6.03476	10.824	5.65938	1.09427	0.832032	1.18184
vih-RA	vih	CG10682	FBtr0075958	FBgn0264848	178	536	17.9664	55.4628	15.6277	26.3026	33.0379	15.5999	0.683065	1.67876	1.00179
rhi-RA	rhi	CG10683	FBtr0086897	FBgn0004400	418	1256	0	0	0	0.876967	0.0255768	0.363029	0	0	0
l(2)37Cg-RA	l(2)37Cg	CG10685	FBtr0081161	FBgn0086447	105	317	17.0879	17.3373	11.4671	10.9386	12.3747	10.717	1.56216	1.40103	1.06999
tral-RD	tral	CG10686	FBtr0332637	FBgn0041775	646	1940	52.1211	77.3913	61.9152	35.3048	71.6409	44.3837	1.47632	1.08027	1.395
AsnRS-RA	AsnRS	CG10687	FBtr0081162	FBgn0086443	558	1676	38.7843	40.8409	18.86	15.6189	27.8476	18.7574	2.48316	1.46659	1.00547
Pmm2-RA	Pmm2	CG10688	FBtr0075961	FBgn0036300	254	764	25.2094	17.3301	29.9958	11.9687	10.1693	16.3082	2.10627	1.70416	1.8393
l(2)37Cb-RA	l(2)37Cb	CG10689	FBtr0081163	FBgn0086444	894	2684	1.79396	4.18841	2.88535	1.36855	2.8883	1.4044	1.31085	1.45013	2.0545
l(2)37Cc-RB	l(2)37Cc	CG10691	FBtr0081164	FBgn0002031	276	830	114.574	127.918	68.9312	59.9607	60.3469	54.3966	1.91081	2.1197	1.2672
Mt2-RD	Mt2	CG10692	FBtr0342603	FBgn0028707	345	1037	1.1608	1.92722	1.52408	1.3051	0.608419	0.881473	0.889434	3.16758	1.72901
slo-RS	slo	CG10693	FBtr0301582	FBgn0003429	1210	3632	6.62857	9.35432	1.34897	40.6344	31.602	23.8868	0.163127	0.296004	0.0564734
CG10694-RA	CG10694	CG10694	FBtr0084542	FBgn0039147	290	872	0	0	0	1.49118	0.0207415	0.0723083	0	0	0
Pat1-RA	Pat1	CG10695	FBtr0070945	FBgn0029878	686	2060	18.9912	27.1644	12.2755	11.4023	17.56	20.6362	1.66555	1.54695	0.594852
Ddc-RB	Ddc	CG10697	FBtr0081166	FBgn0000422	475	1427	29.1025	56.7205	18.496	60.6579	32.1828	31.6046	0.479782	1.76245	0.585232
CrzR-RA	CrzR	CG10698	FBtr0075989	FBgn0036278	579	1739	5.19155	4.16598	2.99916	3.09994	3.02593	4.30788	1.67473	1.37676	0.696204
Lim3-RE	Lim3	CG10699	FBtr0309834	FBgn0002023	405	1217	0.989111	4.72124	0	3.21827	6.382	1.52352	0.307342	0.739775	0
Alh-RM	Alh	CG1070	FBtr0334674	FBgn0261238	1084	3254	2.21957	7.21655	1.89423	4.79529	8.46622	2.67108	0.462865	0.852393	0.709163
CG10700-RA	CG10700	CG10700	FBtr0081171	FBgn0032754	539	1619	0	0	0	0.0760082	0	0.00570406	0	#DIV/0!	0
Moe-RF	Moe	CG10701	FBtr0071274	FBgn0011661	575	1727	150.556	86.9363	125.925	133.395	201.18	244.681	1.12865	0.432131	0.514649
CG10702-RC	CG10702	CG10702	FBtr0081176	FBgn0032752	946	2840	6.78168	1.75926	36.2839	5.45337	1.163	22.6491	1.24358	1.5127	1.602
GCC88-RA	GCC88	CG10703	FBtr0082366	FBgn0037881	695	2087	5.19106	12.808	7.04281	6.74246	10.7479	7.91927	0.769906	1.19167	0.889325
toe-RA	toe	CG10704	FBtr0075980	FBgn0036285	640	1922	0.31315	1.03981	0.575612	4.64498	3.20827	2.29565	0.0674169	0.324105	0.25074
SK-RQ	SK	CG10706	FBtr0331604	FBgn0029761	928	2786	4.75278	11.0292	1.41822	34.2561	53.3754	29.932	0.138743	0.206634	0.0473815
E2f2-RA	E2f2	CG1071	FBtr0081501	FBgn0024371	370	1112	11.9076	11.4574	9.38046	9.01741	10.4716	7.32602	1.32051	1.09414	1.28043
CG10710-RA	CG10710	CG10710	FBtr0075817	FBgn0036377	709	2129	0	0	0.14847	0.732656	0.418764	0.303351	0	0	0.489434
Vps36-RA	Vps36	CG10711	FBtr0075818	FBgn0086785	399	1199	3.01188	4.16706	5.40443	5.14755	7.71937	6.73052	0.585109	0.539819	0.802973
Chro-RC	Chro	CG10712	FBtr0078569	FBgn0044324	926	2780	10.8251	15.9954	7.10641	9.27503	13.6381	7.97869	1.16712	1.17284	0.890674
CG10713-RA	CG10713	CG10713	FBtr0075855	FBgn0036360	475	1427	2.10888	7.87785	0.110754	3.11986	9.03264	2.11901	0.675954	0.872154	0.052267
ImpL1-RA	ImpL1	CG10717	FBtr0075842	FBgn0001256	341	1025	0	0.974889	13.5689	1.07207	0.354823	9.99921	0	2.74753	1.357
neb-RA	neb	CG10718	FBtr0081332	FBgn0004374	1121	3365	0.178863	0.148479	0.281807	0.772796	0.313017	0.548398	0.231449	0.474347	0.513873
brat-RE	brat	CG10719	FBtr0336627	FBgn0010300	1061	3185	2.83457	8.62785	1.98489	7.43784	18.849	7.88049	0.381102	0.457735	0.251874
Awh-RC	Awh	CG1072	FBtr0330070	FBgn0013751	287	863	1.39484	3.18421	0.366273	1.21379	2.86281	0.446733	1.14916	1.11227	0.819892
Pyroxd1-RA	Pyroxd1	CG10721	FBtr0081333	FBgn0032846	472	1418	4.24453	6.16611	3.34372	4.61146	14.0584	5.28187	0.920431	0.438607	0.633057
nesd-RB	nesd	CG10722	FBtr0081334	FBgn0032848	602	1808	0.332895	1.38172	1.39864	1.21471	0.753792	0.596671	0.274054	1.83303	2.34408
Kua-RA	Kua	CG10723	FBtr0081336	FBgn0032850	310	932	0	0.804127	0.339156	2.12847	1.64108	0.926445	0	0.489999	0.366083
flr-RB	flr	CG10724	FBtr0075846	FBgn0260049	604	1814	23.5574	19.0047	14.8986	8.44069	4.39713	5.35252	2.79093	4.32207	2.78347
CG10725-RB	CG10725	CG10725	FBtr0089323	FBgn0036362	269	809	0	0	0.19536	1.69849	0	0.0114146	0	#DIV/0!	17.1149
barr-RA	barr	CG10726	FBtr0081348	FBgn0014127	735	2207	2.18169	2.943	3.86702	2.14324	0.945525	1.20921	1.01794	3.11256	3.19798
vls-RA	vls	CG10728	FBtr0081347	FBgn0003978	367	1103	6.00237	6.56813	4.44193	3.882	7.08854	3.76306	1.54621	0.926584	1.1804
CG10730-RC	CG10730	CG10730	FBtr0343848	FBgn0032843	644	1934	0	0	0.0817201	0.866076	0.0953696	0.0449965	0	0	1.81614
CG10731-RB	CG10731	CG10731	FBtr0344527	FBgn0034081	203	611	9.85064	16.3545	9.31208	8.58244	21.8237	8.36891	1.14777	0.749393	1.1127
cmb-RB	cmb	CG10732	FBtr0075852	FBgn0036365	809	2429	6.93803	3.4968	1.10613	6.69835	1.26993	3.28075	1.03578	2.75354	0.337158
loj-RE	loj	CG10733	FBtr0301447	FBgn0061492	237	713	32.9216	15.4164	24.6047	13.8692	5.57511	11.4659	2.37372	2.76521	2.14591
CG10734-RA	CG10734	CG10734	FBtr0087250	FBgn0034082	368	1106	0.54419	0	0.285799	13.3947	0.103922	0.262229	0.0406272	0	1.08988
CG10737-RO	CG10737	CG10737	FBtr0290317	FBgn0034420	944	2834	22.0871	16.9247	13.4959	27.0175	6.72285	11.5355	0.817511	2.51749	1.16994
CG10738-RF	CG10738	CG10738	FBtr0304792	FBgn0036368	1235	3707	0.162362	0.269561	0.127904	0.586239	0.949305	0.334883	0.276955	0.283956	0.381936
pigeon-RA	pigeon	CG10739	FBtr0081194	FBgn0010309	915	2747	3.72474	8.18471	1.26575	1.96498	4.30914	1.30834	1.89556	1.89938	0.967452
CG1074-RA	CG1074	CG1074	FBtr0078925	FBgn0037250	488	1466	5.74778	12.0988	3.66547	4.06757	5.32592	4.34465	1.41308	2.27169	0.843676
Tgi-RA	Tgi	CG10741	FBtr0075811	FBgn0036373	535	1607	7.11612	7.61727	7.47451	8.23127	10.2156	11.5492	0.864523	0.745649	0.647188
Tsp3A-RB	Tsp3A	CG10742	FBtr0307159	FBgn0040334	304	914	5.26805	5.1931	2.24793	3.69294	3.47844	3.45913	1.42652	1.49294	0.649854
Liprin-ﾎｲ-RC	Liprin-ﾎｲ	CG10743	FBtr0330342	FBgn0036376	680	2042	4.12646	2.20209	4.95347	10.0229	6.01671	11.8793	0.411702	0.365997	0.416982
CG10747-RA	CG10747	CG10747	FBtr0081341	FBgn0032845	328	986	9.1563	6.0807	11.2203	8.72887	8.77173	13.1383	1.04897	0.693215	0.85402
CG10748-RA	CG10748	CG10748	FBtr0075900	FBgn0036327	349	1049	0	0	0	0.968895	0.0350398	0.0261759	0	0	0
CG10749-RA	CG10749	CG10749	FBtr0075871	FBgn0036328	347	1043	0	0.479032	0.303062	3.6037	0	0.0424775	0	#DIV/0!	7.13463
CG10750-RB	CG10750	CG10750	FBtr0343804	FBgn0032769	331	995	0	0	0	2.41915	0.00854375	0.0425498	0	0	0
robl-RA	robl	CG10751	FBtr0086920	FBgn0024196	97	293	76.0046	264.31	111.658	43.0657	126.639	54.9482	1.76485	2.08712	2.03205
CG10752-RA	CG10752	CG10752	FBtr0075903	FBgn0036325	539	1619	0	0	0	0.951374	0.0169767	0.0394557	0	0	0
SmD1-RA	SmD1	CG10753	FBtr0075952	FBgn0261933	124	374	24.1393	25.3823	19.4389	14.2259	9.91497	9.88948	1.69686	2.56	1.96561
Sf3a2-RA	Sf3a2	CG10754	FBtr0075944	FBgn0036314	264	794	24.2569	28.9459	15.526	9.73798	11.739	6.5015	2.49096	2.46578	2.38806
Cyp4ae1-RA	Cyp4ae1	CG10755	FBtr0070388	FBgn0015036	496	1490	2.01971	4.86218	2.43965	1.7673	2.79348	1.80557	1.14282	1.74054	1.35118
Taf13-RA	Taf13	CG10756	FBtr0081340	FBgn0032847	136	410	22.0198	37.1677	34.6932	16.337	25.353	21.5747	1.34784	1.466	1.60805
mRpS18B-RB	mRpS18B	CG10757	FBtr0081339	FBgn0032849	204	614	13.7235	27.26	12.6128	10.0384	14.2339	6.46467	1.3671	1.91515	1.95104
Or7a-RA	Or7a	CG10759	FBtr0071186	FBgn0030016	413	1241	0	0	0.127354	0.0894004	0.00808285	0.0402545	0	0	3.16373
Vha14-2-RB	Vha14-2	CG1076	FBtr0309511	FBgn0037402	124	374	0	0	0	2.5133	0.0169576	0.0337811	0	0	0
CG10761-RA	CG10761	CG10761	FBtr0071187	FBgn0030015	323	971	0	0.257276	0	2.23311	0	0	0	#DIV/0!	#DIV/0!
Gﾎｲ5-RA	Gﾎｲ5	CG10763	FBtr0071189	FBgn0030011	358	1076	35.2398	156.715	6.75664	18.6424	74.9247	12.1609	1.8903	2.09163	0.555606
CG10764-RA	CG10764	CG10764	FBtr0086919	FBgn0034221	523	1571	0	0	0	0.600897	0.0472419	0.141165	0	0	0
CG1077-RA	CG1077	CG1077	FBtr0078587	FBgn0037405	730	2192	0	0.797768	0.0721016	0.906805	0.0784971	0.00434371	0	10.163	16.5991
Fur1-RI	Fur1	CG10772	FBtr0336805	FBgn0004509	892	2678	18.8788	9.79485	15.0492	12.2505	14.2641	17.5038	1.54107	0.686678	0.859768
wit-RA	wit	CG10776	FBtr0073279	FBgn0024179	903	2711	9.76852	17.6926	2.91491	6.85644	13.4455	5.67895	1.42472	1.31587	0.513284
mahe-RB	mahe	CG10777	FBtr0071132	FBgn0029979	945	2837	24.8217	43.3236	20.7238	16.7754	41.1553	24.8851	1.47965	1.05269	0.832779
CG10778-RB	CG10778	CG10778	FBtr0331433	FBgn0029980	300	902	10.6763	13.017	5.08132	5.64496	8.34569	7.46544	1.89129	1.55973	0.680646
Fip1-RA	Fip1	CG1078	FBtr0078928	FBgn0037255	701	2105	8.00593	11.749	5.33079	6.34619	16.4118	8.51877	1.26153	0.715889	0.62577
ng1-RA	ng1	CG10781	FBtr0070523	FBgn0002933	107	323	1.86339	0	0	0	0	0	#DIV/0!	#DIV/0!	#DIV/0!
ng3-RB	ng3	CG10788	FBtr0070539	FBgn0010295	146	440	1.3679	0	0	0	0	0	#DIV/0!	#DIV/0!	#DIV/0!
ng4-RA	ng4	CG10789	FBtr0070538	FBgn0010296	57	173	0	0	0	0.0831725	0	0.149801	0	#DIV/0!	0
Fie-RB	Fie	CG1079	FBtr0333140	FBgn0026592	250	752	152.069	731.175	208.697	63.5741	226.032	108.675	2.392	3.23483	1.92038
Pig1-RB	Pig1	CG10790	FBtr0070537	FBgn0003086	172	518	0	0	0	0	0	0.130425	#DIV/0!	#DIV/0!	0
CG10793-RA	CG10793	CG10793	FBtr0070536	FBgn0029656	479	1439	0	0	0.109831	0.455118	0.0302559	0.0421908	0	0	2.6032
DptB-RA	DptB	CG10794	FBtr0086621	FBgn0034407	120	362	114.722	22.7732	10.4782	158.318	15.785	60.5075	0.724629	1.44271	0.173172
CG10795-RA	CG10795	CG10795	FBtr0071609	FBgn0034626	178	536	10.1061	11.6518	11.4997	11.1035	13.5799	16.735	0.91017	0.858021	0.68716
Myc-RB	Myc	CG10798	FBtr0331605	FBgn0262656	717	2153	18.1708	10.9069	12.8463	12.281	11.0224	19.0188	1.47959	0.989523	0.675455
CG10799-RA	CG10799	CG10799	FBtr0087748	FBgn0033821	166	500	207.045	26.4804	338.536	91.9042	9.98803	166.744	2.25283	2.65122	2.03028
Rca1-RA	Rca1	CG10800	FBtr0079342	FBgn0017551	411	1235	2.43674	6.27067	2.04757	4.40707	10.6599	3.74326	0.552915	0.58825	0.547001
CG10801-RA	CG10801	CG10801	FBtr0070526	FBgn0029660	558	1676	0	0	0.0942999	0.492648	0	0.102381	0	#DIV/0!	0.921068
CG10802-RA	CG10802	CG10802	FBtr0070568	FBgn0029664	436	1310	8.27003	24.4094	13.0298	9.1574	24.4085	10.8212	0.903098	1.00004	1.2041
CG10803-RE	CG10803	CG10803	FBtr0332285	FBgn0029666	617	1853	1.62405	2.83115	3.49698	7.87827	13.613	13.595	0.206144	0.207973	0.257225
CG10804-RC	CG10804	CG10804	FBtr0114487	FBgn0029663	726	2180	8.55876	49.6193	1.01498	8.99837	40.0339	7.13568	0.951146	1.23943	0.14224
l(2)k09022-RA	l(2)k09022	CG10805	FBtr0079343	FBgn0086451	2096	6290	4.21025	1.50922	1.48247	0.895557	0.896552	1.04287	4.70126	1.68336	1.42153
Nha1-RB	Nha1	CG10806	FBtr0079373	FBgn0031865	708	2126	9.05925	3.29014	2.08152	4.74232	0.56081	1.55693	1.9103	5.86675	1.33694
Syngr-RA	Syngr	CG10808	FBtr0087645	FBgn0033876	241	725	135.318	569.579	11.1178	37.0637	158.252	28.7542	3.65096	3.5992	0.386648
CG10809-RA	CG10809	CG10809	FBtr0076366	FBgn0036052	358	1076	3.91554	12.5372	4.11274	4.67636	10.2585	3.28051	0.837305	1.22213	1.25369
Rheb-RB	Rheb	CG1081	FBtr0078694	FBgn0041191	182	548	135.092	82.0562	98.3465	41.9607	26.8463	38.9582	3.2195	3.05652	2.52441
Drs-RA	Drs	CG10810	FBtr0073073	FBgn0283461	70	212	122.078	49.4917	114.062	163.942	21.6083	101.852	0.744643	2.2904	1.11987
eIF4G1-RA	eIF4G1	CG10811	FBtr0089243	FBgn0023213	1666	5000	67.2895	48.3643	59.8997	22.1832	24.7984	22.1611	3.03336	1.9503	2.70292
Drsl5-RA	Drsl5	CG10812	FBtr0073062	FBgn0035434	69	209	901.371	396.836	322.899	231.954	556.277	703.791	3.88599	0.713379	0.4588
CG10814-RA	CG10814	CG10814	FBtr0087720	FBgn0033830	402	1208	0.996481	0.206801	1.04667	0.502629	0.275416	1.6391	1.98254	0.750868	0.638561
Dro-RA	Dro	CG10816	FBtr0087436	FBgn0010388	64	194	201.659	103.017	57.0271	632.37	105.14	274.119	0.318894	0.979806	0.208038
ﾎｱ-Est4-RA	ﾎｱ-Est4	CG1082	FBtr0081546	FBgn0015572	541	1625	0	0	0	0.406304	0.154975	0.594579	0	0	0
CG10822-RA	CG10822	CG10822	FBtr0086339	FBgn0034478	114	344	0	0	0	2.84603	0	0	0	#DIV/0!	#DIV/0!
SIFaR-RC	SIFaR	CG10823	FBtr0301815	FBgn0038880	758	2276	0.793332	4.28067	0.0694405	0.949397	4.54535	0.606435	0.835616	0.941768	0.114506
cDIP-RA	cDIP	CG10824	FBtr0084028	FBgn0038865	554	1664	16.2766	0.900777	4.2741	4.70479	0.56824	3.56306	3.45959	1.5852	1.19956
Ice2-RC	Ice2	CG10825	FBtr0113258	FBgn0038860	394	1184	1.01668	3.16489	0.667427	1.77657	3.45167	2.03814	0.572273	0.916915	0.327469
Alp5-RA	Alp5	CG10827	FBtr0084048	FBgn0038845	522	1568	0	0.318642	0.302385	2.61338	0.0659665	0.149331	0	4.83036	2.02493
Ktl-RA	Ktl	CG10830	FBtr0083986	FBgn0038839	228	686	43.8684	255.642	5.99011	20.8835	147.175	17.5204	2.10063	1.73699	0.341893
Cyp28d1-RA	Cyp28d1	CG10833	FBtr0079062	FBgn0031689	502	1508	272.999	22.3641	609.234	68.6126	12.6092	162.028	3.97884	1.77364	3.76005
CG10834-RA	CG10834	CG10834	FBtr0085943	FBgn0032972	97	293	0	0	0.539408	4.66198	0	0.0902863	0	#DIV/0!	5.97442
eIF4B-RB	eIF4B	CG10837	FBtr0113680	FBgn0020660	459	1379	74.6342	168.838	58.7947	75.6871	137.875	83.7301	0.986088	1.22458	0.702193
robl22E-RA	robl22E	CG10838	FBtr0077800	FBgn0028570	97	293	0	0	0	5.61021	0	0.0631529	0	#DIV/0!	0
CG10839-RA	CG10839	CG10839	FBtr0080800	FBgn0028858	182	548	0	0.455868	0	3.2412	0.0290142	0	0	15.7119	#DIV/0!
Cont-RA	Cont	CG1084	FBtr0078917	FBgn0037240	1390	4172	28.7088	12.9339	37.6554	7.89095	3.24327	7.97069	3.63819	3.98791	4.72423
eIF5B-RB	eIF5B	CG10840	FBtr0073144	FBgn0026259	1144	3434	10.5161	10.0392	8.19228	11.7929	27.819	14.5326	0.891732	0.360874	0.563718
CG10841-RA	CG10841	CG10841	FBtr0082795	FBgn0038163	728	2186	0	0	0.144599	3.54427	0.0458969	0.0997428	0	0	1.44972
Cyp4p1-RA	Cyp4p1	CG10842	FBtr0088592	FBgn0015037	513	1541	18.357	10.6994	1.94866	32.425	9.66842	20.3555	0.566137	1.10664	0.0957312
Cyp4p3-RA	Cyp4p3	CG10843	FBtr0088593	FBgn0033397	515	1547	8.5593	3.39116	2.86057	6.75404	1.89095	4.46875	1.26729	1.79336	0.640128
RyR-RJ	RyR	CG10844	FBtr0308083	FBgn0011286	5115	15347	1.45106	1.62778	0.51491	3.99449	1.34669	1.81948	0.363264	1.20873	0.282999
CG10845-RA	CG10845	CG10845	FBtr0084713	FBgn0039246	463	1391	0	0	0.113621	3.50396	0	0.0051729	0	#DIV/0!	21.9646
DCTN5-p25-RA	DCTN5-p25	CG10846	FBtr0080693	FBgn0040228	189	569	20.0977	42.1481	28.3317	12.6854	19.9678	13.6017	1.58432	2.1108	2.08296
enc-RA	enc	CG10847	FBtr0073153	FBgn0004875	1823	5471	11.0012	39.817	5.14208	9.52716	40.6099	10.0577	1.15472	0.980476	0.511257
Sc2-RA	Sc2	CG10849	FBtr0073159	FBgn0035471	302	908	79.5429	83.0884	74.4977	51.0059	20.0778	32.1966	1.55948	4.13832	2.31384
ida-RA	ida	CG10850	FBtr0073160	FBgn0041147	777	2333	1.5479	3.10529	1.55811	0.885331	1.47165	0.780669	1.74838	2.11008	1.99587
B52-RA	B52	CG10851	FBtr0082801	FBgn0004587	350	1052	64.65	92.8496	36.8074	114.455	80.1188	64.0588	0.56485	1.1589	0.574588
Acp63F-RB	Acp63F	CG10852	FBtr0346805	FBgn0015585	81	245	2.45663	0	0	55.869	0.285918	0.474646	0.0439712	0	0
CG10853-RA	CG10853	CG10853	FBtr0073164	FBgn0035478	155	467	0	0	0	0.0377671	0.0682919	0.0340109	0	0	0
ntc-RA	ntc	CG10855	FBtr0073185	FBgn0035461	314	944	4.46305	4.23416	7.534	10.7927	4.18288	6.3163	0.413523	1.01226	1.19279
ppk27-RB	ppk27	CG10858	FBtr0303094	FBgn0035458	422	1268	0	0	0	0	0.0290772	0	#DIV/0!	0	#DIV/0!
CG10859-RB	CG10859	CG10859	FBtr0342635	FBgn0032520	627	1883	0.319636	0	0.167867	5.70528	0.0454249	0.0955179	0.0560245	0	1.75744
Atg12-RB	Atg12	CG10861	FBtr0300011	FBgn0036255	111	335	16.1698	28.3373	19.8148	28.4099	33.5843	23.3883	0.569159	0.843765	0.847208
CG10862-RA	CG10862	CG10862	FBtr0073139	FBgn0035455	354	1064	0	0	0.14854	7.10034	0.00835879	0.0832574	0	0	1.78411
CG10863-RA	CG10863	CG10863	FBtr0073171	FBgn0027552	316	950	372.528	61.0076	325.909	123.617	21.2209	99.2667	3.01356	2.87488	3.28316
CG10864-RA	CG10864	CG10864	FBtr0083654	FBgn0038621	389	1169	1.02972	0	1.62238	0.0715434	0.0323418	0.0450995	14.393	0	35.9733
CG10866-RA	CG10866	CG10866	FBtr0073173	FBgn0035475	224	674	2.67897	13.7139	5.15879	7.52416	12.4717	7.50876	0.356048	1.0996	0.687037
orb-RC	orb	CG10868	FBtr0084386	FBgn0004882	559	1679	0.716944	6.39789	0.65892	8.62148	0.366656	0.304339	0.0831579	17.4493	2.16509
CG10869-RA	CG10869	CG10869	FBtr0077917	FBgn0031347	659	1979	0	0	0	11.7667	0.356117	0.498389	0	0	0
CG10874-RB	CG10874	CG10874	FBtr0077849	FBgn0031395	218	656	9.17491	11.4245	10.1188	15.3503	24.2834	17.7643	0.597704	0.470465	0.569616
CG10877-RA	CG10877	CG10877	FBtr0083950	FBgn0038804	441	1325	0.454245	1.13124	6.32186	0.772053	0.228445	1.69392	0.588359	4.9519	3.73208
Vha26-RB	Vha26	CG1088	FBtr0078700	FBgn0283535	226	680	267.303	686.258	400.462	119.699	223.561	119.484	2.23312	3.06967	3.3516
daed-RA	daed	CG10880	FBtr0077843	FBgn0031398	279	839	0.717371	5.06181	2.82562	2.66139	6.17959	3.03478	0.269547	0.819118	0.931081
eIF3g2-RA	eIF3g2	CG10881	FBtr0083885	FBgn0038796	273	821	0.733099	0.304282	0.77002	1.76931	0	0.0408548	0.414343	#DIV/0!	18.8477
Sec24CD-RB	Sec24CD	CG10882	FBtr0329964	FBgn0262126	1193	3581	33.6149	26.5791	24.23	8.26267	11.3013	7.51753	4.06828	2.35186	3.22313
CG10887-RA	CG10887	CG10887	FBtr0083864	FBgn0038773	676	2030	0	0	0	0.213139	0	0.0502703	0	#DIV/0!	0
Rh3-RA	Rh3	CG10888	FBtr0083876	FBgn0003249	383	1151	455.981	1060.03	21.6954	349.821	1503.65	193.551	1.30347	0.704974	0.112091
CG10889-RA	CG10889	CG10889	FBtr0083839	FBgn0038769	540	1622	1.85535	2.00222	3.31294	1.09198	1.07955	1.47507	1.69906	1.85468	2.24596
ﾎｱ-Est5-RA	ﾎｱ-Est5	CG1089	FBtr0081547	FBgn0261393	542	1628	8.87284	1.84139	2.91241	3.7476	0.372023	2.1435	2.36761	4.94967	1.35871
mus201-RC	mus201	CG10890	FBtr0100473	FBgn0002887	1236	3710	2.27122	2.08741	1.065	1.62294	2.53257	1.58375	1.39945	0.824224	0.672457
lok-RB	lok	CG10895	FBtr0081329	FBgn0019686	459	1379	1.74583	2.35504	1.37532	6.5197	0.691516	3.1684	0.267777	3.40562	0.434073
tou-RB	tou	CG10897	FBtr0088094	FBgn0033636	249	749	1.60714	8.67183	1.26606	4.52671	6.07768	3.10757	0.355035	1.42683	0.407412
CG10898-RA	CG10898	CG10898	FBtr0082410	FBgn0037911	340	1022	3.53351	9.77751	3.86611	4.57901	9.07529	4.5197	0.771675	1.07738	0.85539
CAH4-RA	CAH4	CG10899	FBtr0084732	FBgn0039235	279	839	0	0	0.37675	3.14273	0	0.052025	0	#DIV/0!	7.24171
CG1090-RH	CG1090	CG1090	FBtr0335202	FBgn0037238	633	1901	39.8928	136.669	5.73657	3.29332	10.9763	2.05957	12.1132	12.4513	2.78532
osk-RC	osk	CG10901	FBtr0081956	FBgn0003015	468	1406	0	0.710712	0	10.7359	0.258933	0.637803	0	2.74477	0
CG10903-RA	CG10903	CG10903	FBtr0081787	FBgn0037543	276	830	10.1521	11.7383	8.37838	6.75695	8.79744	7.46382	1.50247	1.33429	1.12253
CG10904-RB	CG10904	CG10904	FBtr0343289	FBgn0034945	266	800	3.00937	9.68035	4.7414	6.84891	13.1444	9.13947	0.439394	0.736462	0.518783
CG10907-RA	CG10907	CG10907	FBtr0076029	FBgn0036207	502	1508	5.58769	4.1415	2.51533	3.40692	4.75757	3.05566	1.6401	0.870508	0.823171
Der-1-RA	Der-1	CG10908	FBtr0077813	FBgn0267972	245	737	57.1658	58.3016	50.6092	36.8417	27.6531	34.6112	1.55166	2.10832	1.46222
CG10909-RA	CG10909	CG10909	FBtr0082685	FBgn0038090	349	1049	0	0	0	0.662615	0	0.00852448	0	#DIV/0!	0
Tailor-RA	Tailor	CG1091	FBtr0081641	FBgn0037470	505	1517	9.52207	9.55128	7.29286	14.6477	9.32184	8.67677	0.650071	1.02461	0.840503
CG10910-RB	CG10910	CG10910	FBtr0089630	FBgn0034289	623	1871	0.643372	2.26984	6.67327	1.0596	0.0504214	0.200888	0.607181	45.0173	33.2188
CG10911-RA	CG10911	CG10911	FBtr0086808	FBgn0034295	359	1079	3.34684	46.768	55.5141	65.6027	0.2631	0.63877	0.0510169	177.758	86.9077
CG10912-RA	CG10912	CG10912	FBtr0086807	FBgn0034296	271	815	2.95398	27.587	28.1187	33.1154	0.286826	0.450514	0.0892028	96.1802	62.4148
Spn55B-RA	Spn55B	CG10913	FBtr0086733	FBgn0028983	374	1124	16.5997	8.89023	7.45238	8.69791	6.1379	6.32178	1.90847	1.44842	1.17884
CG10914-RA	CG10914	CG10914	FBtr0086745	FBgn0034307	624	1874	1.92703	3.86587	0.759029	2.94076	4.35964	2.01542	0.655281	0.886741	0.376611
Naus-RB	Naus	CG10915	FBtr0345416	FBgn0034308	609	1829	12.8338	21.1708	6.7401	10.0857	26.1012	9.34153	1.27248	0.811106	0.72152
CG10916-RA	CG10916	CG10916	FBtr0086749	FBgn0034312	263	791	6.84813	12.6329	23.3773	6.12609	6.23104	16.8164	1.11786	2.02741	1.39015
fj-RA	fj	CG10917	FBtr0086754	FBgn0000658	583	1751	0.343732	0.856021	0.902608	0.819241	0.155489	0.484332	0.419573	5.50536	1.86361
CG10918-RA	CG10918	CG10918	FBtr0077218	FBgn0031178	183	551	0	0	0.286836	0.241757	0.0156126	0.373221	0	0	0.768542
CG10919-RA	CG10919	CG10919	FBtr0081739	FBgn0037514	187	563	0	0.443722	0	7.90858	0.0518137	0.167729	0	8.56379	0
CG1092-RD	CG1092	CG1092	FBtr0336481	FBgn0037228	394	1184	45.2422	5.06383	5.87335	12.4258	1.70125	7.97647	3.641	2.97653	0.736335
CG10920-RA	CG10920	CG10920	FBtr0071150	FBgn0029963	397	1193	0	0.209401	0.264957	2.11496	0	0.0396794	0	#DIV/0!	6.67743
La-RA	La	CG10922	FBtr0081374	FBgn0011638	390	1172	45.1919	72.4721	64.1896	20.2573	45.7746	50.7384	2.23089	1.58324	1.26511
Klp67A-RA	Klp67A	CG10923	FBtr0076499	FBgn0004379	814	2444	0.246266	0.306647	0.129334	1.21032	0.173144	0.344919	0.203472	1.77105	0.37497
Pepck2-RB	Pepck2	CG10924	FBtr0113093	FBgn0034356	563	1691	48.7621	1.18186	12.8045	15.9706	0.427611	6.30956	3.05324	2.76387	2.02938
CG10927-RA	CG10927	CG10927	FBtr0086705	FBgn0034360	360	1082	0	1.3853	1.31462	1.18082	2.4882	1.50074	0	0.556747	0.875982
PpY-55A-RB	PpY-55A	CG10930	FBtr0344898	FBgn0003140	314	944	0	0	0.167422	2.11398	0	0	0	#DIV/0!	#DIV/0!
CG10931-RA	CG10931	CG10931	FBtr0089545	FBgn0034274	345	1037	0	0	0	0.683579	0	0.0415941	0	#DIV/0!	0
CG10932-RA	CG10932	CG10932	FBtr0071143	FBgn0029969	410	1232	74.7457	11.9636	32.9691	21.7679	3.71248	20.6048	3.43376	3.22253	1.60007
Dlish-RA	Dlish	CG10933	FBtr0086860	FBgn0034264	355	1067	1.12816	0.702386	0.59249	1.77403	0.358021	0.927174	0.635931	1.96186	0.639028
CG10934-RA	CG10934	CG10934	FBtr0086859	FBgn0034263	194	584	0	0	0.270628	8.98503	0.0577502	0.0862827	0	0	3.13652
CG10936-RA	CG10936	CG10936	FBtr0086895	FBgn0034253	1524	4574	1.05269	4.26008	5.52852	0.545161	0.336062	0.537432	1.93097	12.6765	10.2869
Prosﾎｱ5-RA	Prosﾎｱ5	CG10938	FBtr0086910	FBgn0016697	244	734	88.5592	84.4063	62.4435	54.2616	41.8704	52.5185	1.63208	2.01589	1.18898
CG10939-RA	CG10939	CG10939	FBtr0086909	FBgn0010620	296	890	70.3314	21.3326	32.8524	19.685	4.40262	13.9942	3.57284	4.84542	2.34757
CG10943-RA	CG10943	CG10943	FBtr0075936	FBgn0036320	308	926	0	1.61867	0.170677	5.65797	0.349179	0.0869497	0	4.63565	1.96294
RpS6-RB	RpS6	CG10944	FBtr0071135	FBgn0261592	248	746	294.483	196.571	175.207	915.394	1356.25	1278.14	0.321701	0.144937	0.13708
dpr14-RB	dpr14	CG10946	FBtr0307270	FBgn0029974	340	1022	3.53351	18.3328	0.773222	11.5776	42.0819	9.35878	0.305201	0.435646	0.08262
CG10947-RB	CG10947	CG10947	FBtr0081369	FBgn0032857	404	1214	8.42822	25.3108	6.76971	12.8298	19.9237	10.1105	0.656925	1.27039	0.66957
CG10948-RB	CG10948	CG10948	FBtr0075938	FBgn0036317	436	1310	1.37834	9.91634	3.1368	12.8939	13.1328	8.82662	0.106898	0.755084	0.35538
CG10949-RA	CG10949	CG10949	FBtr0081367	FBgn0032858	459	1379	0.872914	4.71008	1.37532	4.02584	20.5931	6.72462	0.216828	0.228721	0.204519
CG10950-RA	CG10950	CG10950	FBtr0086990	FBgn0034205	586	1760	0	0	0	1.71452	0.00527253	0.0735236	0	0	0
niki-RA	niki	CG10951	FBtr0084737	FBgn0045980	841	2525	0	1.68193	0.0625927	0.183003	0.485579	0.189881	0	3.46375	0.329642
eag-RA	eag	CG10952	FBtr0073955	FBgn0000535	1174	3524	1.02476	5.45851	0.448486	9.81063	8.63901	4.38381	0.104454	0.631844	0.102305
CG10953-RB	CG10953	CG10953	FBtr0329878	FBgn0034204	278	836	0	0	0	0	0.0134841	0	#DIV/0!	0	#DIV/0!
Arpc2-RA	Arpc2	CG10954	FBtr0081358	FBgn0032859	301	905	18.6215	21.255	18.3369	20.6625	17.4349	18.1645	0.901222	1.21911	1.00949
Rtf1-RB	Rtf1	CG10955	FBtr0342988	FBgn0034722	775	2327	18.6227	29.9521	9.57652	7.89647	19.4712	7.13642	2.35835	1.53827	1.34192
Spn53F-RB	Spn53F	CG10956	FBtr0110777	FBgn0034195	379	1139	0	0.438657	0.555036	0.468797	0.0235471	0	0	18.629	#DIV/0!
CG10958-RA	CG10958	CG10958	FBtr0071153	FBgn0030004	743	2231	0.269778	1.11975	0.141682	2.45826	6.30098	1.66219	0.109744	0.17771	0.0852385
CG10959-RA	CG10959	CG10959	FBtr0071157	FBgn0030010	443	1331	1.35659	2.43997	0.593714	1.62078	2.37303	0.936745	0.837	1.02821	0.633805
CG10960-RA	CG10960	CG10960	FBtr0075943	FBgn0036316	471	1415	140.366	188.553	198.591	43.8201	59.8242	45.1642	3.20325	3.15179	4.3971
Traf6-RA	Traf6	CG10961	FBtr0071188	FBgn0265464	475	1427	3.37421	9.62849	2.10433	5.89427	10.8419	3.38926	0.572455	0.888083	0.620883
CG10962-RB	CG10962	CG10962	FBtr0071263	FBgn0030073	249	749	6.42856	1.66766	2.53212	1.59213	2.41158	4.82271	4.03772	0.691521	0.525041
sni-RA	sni	CG10964	FBtr0071183	FBgn0030026	247	743	34.0225	22.5271	22.335	12.0179	16.253	14.3971	2.83098	1.38602	1.55136
Corp-RA	Corp	CG10965	FBtr0071179	FBgn0030028	213	641	1.87792	0	11.3419	1.72084	0.370439	4.03105	1.09128	0	2.81363
Atg1-RA	Atg1	CG10967	FBtr0075945	FBgn0260945	835	2507	13.2043	25.2107	7.43897	15.8676	25.6179	11.1219	0.832151	0.984107	0.668857
CG10969-RA	CG10969	CG10969	FBtr0075946	FBgn0036310	697	2093	0	0	0	1.20115	0	0.021293	0	#DIV/0!	0
CG10970-RB	CG10970	CG10970	FBtr0346175	FBgn0030078	103	311	0	0	0.508188	4.22057	1.78593	6.40833	0	0	0.0793012
Hip1-RA	Hip1	CG10971	FBtr0075948	FBgn0036309	1124	3374	2.14063	4.44248	3.84109	2.58802	4.10582	2.81678	0.827131	1.082	1.36364
ppk12-RA	ppk12	CG10972	FBtr0071830	FBgn0034730	569	1709	0	0	0	0.0909061	0.0821899	0.0175425	0	0	0
CG10973-RB	CG10973	CG10973	FBtr0100354	FBgn0036306	306	920	20.2805	30.4123	19.2405	9.57572	6.85797	6.92775	2.11791	4.43459	2.7773
Ptp69D-RA	Ptp69D	CG10975	FBtr0075913	FBgn0014007	1462	4388	4.80073	7.68575	6.01499	2.71572	2.82247	2.0606	1.76775	2.72306	2.91905
jagn-RB	jagn	CG10978	FBtr0078624	FBgn0037374	197	593	24.3592	44.655	31.7159	21.7896	26.7927	31.1498	1.11793	1.66668	1.01818
CG10979-RB	CG10979	CG10979	FBtr0335518	FBgn0037379	959	2879	2.29962	4.59889	1.70179	3.17856	5.35983	3.18859	0.723479	0.85803	0.533712
Madm-RA	Madm	CG1098	FBtr0078722	FBgn0027497	637	1913	5.66322	8.88	6.36152	5.81025	12.3558	7.93425	0.974695	0.718691	0.80178
dgrn-RD	dgrn	CG10981	FBtr0344116	FBgn0037384	205	617	4.87742	6.07331	6.14768	5.73173	7.43554	3.85902	0.850951	0.816794	1.59307
CG10984-RA	CG10984	CG10984	FBtr0075920	FBgn0036305	640	1922	5.94985	21.9661	13.1568	10.7558	41.7631	14.7276	0.553177	0.525969	0.893349
g-RF	g	CG10986	FBtr0331710	FBgn0001087	967	2903	10.5737	14.5432	7.67639	14.1818	9.57379	8.63193	0.745584	1.51906	0.889303
Grip91-RA	Grip91	CG10988	FBtr0073841	FBgn0001612	917	2753	4.3725	10.5262	2.46858	2.25118	4.51484	2.21489	1.94231	2.33147	1.11454
Dap160-RH	Dap160	CG1099	FBtr0333087	FBgn0023388	1005	3017	16.3585	79.5733	8.32927	5.39824	50.08	8.59921	3.03035	1.58892	0.968609
Pdcd4-RD	Pdcd4	CG10990	FBtr0331712	FBgn0030520	509	1529	53.1413	167.306	22.6372	67.4111	221.64	87.4266	0.788316	0.754854	0.258927
CtsB1-RA	CtsB1	CG10992	FBtr0073838	FBgn0030521	340	1022	244.99	162.796	238.152	117.238	52.625	143.947	2.08969	3.0935	1.65445
CG10993-RA	CG10993	CG10993	FBtr0073837	FBgn0030524	210	632	0.952333	0.395278	0.250074	0.341647	0.182526	0	2.78747	2.1656	#DIV/0!
CG10996-RA	CG10996	CG10996	FBtr0073836	FBgn0030525	392	1178	0	0.212067	0	1.29689	0.0240934	0.0159987	0	8.8019	0
Clic-RA	Clic	CG10997	FBtr0073835	FBgn0030529	260	782	49.2582	37.3765	100.851	16.0847	13.1123	32.2378	3.06242	2.8505	3.12834
r-cup-RA	r-cup	CG10998	FBtr0077269	FBgn0031142	594	1784	0	0	0	1.56695	0.159497	0.135503	0	0	0
Rpn5-RA	Rpn5	CG1100	FBtr0078629	FBgn0028690	502	1508	61.0655	68.7489	44.6471	25.3093	28.5503	22.7763	2.41277	2.40799	1.96025
CG11000-RC	CG11000	CG11000	FBtr0308953	FBgn0263353	332	998	14.4739	59.5752	1.90036	16.7172	43.8068	10.985	0.865811	1.35995	0.172995
Fkbp12-RA	Fkbp12	CG11001	FBtr0086515	FBgn0013954	108	326	426.481	577.794	574.495	171.938	153.962	141.853	2.48044	3.75284	4.04993
Sap130-RA	Sap130	CG11006	FBtr0075927	FBgn0262714	1219	3659	6.41517	19.663	7.60213	6.78564	16.2658	6.40741	0.945403	1.20886	1.18646
CG11007-RA	CG11007	CG11007	FBtr0086464	FBgn0034455	271	815	11.0774	28.2	20.3618	12.1482	14.5527	12.9382	0.911855	1.93779	1.57378
Wbp2-RD	Wbp2	CG11009	FBtr0332045	FBgn0036318	226	680	123.915	205.363	183.148	38.17	39.0359	58.299	3.2464	5.26088	3.14153
Ref1-RA	Ref1	CG1101	FBtr0081642	FBgn0010774	266	800	53.4163	87.4354	64.404	52.006	80.8404	68.5639	1.02712	1.08158	0.939328
Ent3-RC	Ent3	CG11010	FBtr0345343	FBgn0036319	668	2006	6.00074	29.39	1.10302	10.3342	38.0959	5.90795	0.580666	0.771475	0.186701
Ugt37A1-RA	Ugt37A1	CG11012	FBtr0081372	FBgn0026756	480	1442	0.417389	0	0	0.164193	0.0494832	0.0184828	2.54206	0	0
COX5B-RB	COX5B	CG11015	FBtr0343157	FBgn0031830	120	362	530.381	1089.66	423.058	361.702	269.624	156.146	1.46635	4.04142	2.70938
CG11018-RA	CG11018	CG11018	FBtr0086472	FBgn0034464	317	953	0	0	0	5.59618	0.0240934	0.0879931	0	0	0
MP1-RA	MP1	CG1102	FBtr0078903	FBgn0027930	390	1172	103.222	12.7892	16.8565	31.3894	7.31035	19.9371	3.28845	1.74946	0.845484
nompC-RD	nompC	CG11020	FBtr0300012	FBgn0016920	1726	5180	0.232384	0.289361	0.122044	0.190648	0.232389	0.0705141	1.21892	1.24516	1.73077
cl-RA	cl	CG11024	FBtr0079095	FBgn0000318	126	380	147.301	180.13	129.349	104.066	77.1282	74.8559	1.41545	2.33546	1.72797
isopeptidase-T-3-RB	isopeptidase-T-3	CG11025	FBtr0086474	FBgn0028372	435	1307	0.921001	2.86705	0.846462	5.59548	6.39712	2.32828	0.164597	0.448178	0.363558
Arf102F-RB	Arf102F	CG11027	FBtr0333699	FBgn0013749	180	542	159.908	261.338	152.798	60.5591	64.1343	67.1813	2.64052	4.07486	2.27441
CG11029-RA	CG11029	CG11029	FBtr0079136	FBgn0031735	447	1343	0.448157	1.67412	1.05914	0.356789	0.177975	0.20497	1.25608	9.40647	5.16727
CG1103-RB	CG1103	CG1103	FBtr0111220	FBgn0037235	230	692	0.86976	2.16603	4.33943	5.91946	3.82513	7.61183	0.146932	0.566264	0.57009
CG11030-RB	CG11030	CG11030	FBtr0332554	FBgn0031736	332	998	9.04621	13.7674	6.33453	4.72559	12.1535	3.68052	1.9143	1.13279	1.7211
Kdm2-RC	Kdm2	CG11033	FBtr0336758	FBgn0037659	1345	4037	6.41085	11.0768	3.9541	5.99997	13.9918	6.78545	1.06848	0.791664	0.582732
CG11034-RC	CG11034	CG11034	FBtr0342609	FBgn0031741	751	2255	2.40216	1.10783	5.74715	2.14654	0.284008	1.51658	1.11909	3.90069	3.78955
CG11035-RA	CG11035	CG11035	FBtr0081816	FBgn0037544	231	695	10.3921	27.3179	5.68513	9.66301	12.321	7.58838	1.07545	2.21719	0.749189
CG11037-RA	CG11037	CG11037	FBtr0078334	FBgn0037038	292	878	0	0	0	7.61316	0	0.0876163	0	#DIV/0!	0
Ufl1-RC	Ufl1	CG1104	FBtr0305316	FBgn0037467	782	2348	12.5604	9.04357	8.95239	6.84464	7.81433	5.46291	1.83507	1.15731	1.63876
CG11041-RB	CG11041	CG11041	FBtr0300692	FBgn0034481	155	467	0	0.534937	0	0.909787	0.579527	0.893784	0	0.923057	0
COX5BL-RA	COX5BL	CG11043	FBtr0079289	FBgn0031831	154	464	0	0	0.340618	11.7385	0.744772	0.58728	0	0	0.579992
CG11044-RA	CG11044	CG11044	FBtr0086313	FBgn0034484	511	1535	4.70521	0.162746	0.205924	3.55792	0.560723	2.32711	1.32246	0.290244	0.0884892
Efhc1.2-RA	Efhc1.2	CG11048	FBtr0086316	FBgn0034487	765	2297	0	0.217515	0	0.276293	0.277124	0.0622035	0	0.7849	0
sv-RI	sv	CG11049	FBtr0301563	FBgn0005561	491	1475	2.04025	1.5243	0.750052	3.7718	0.96585	1.81926	0.540923	1.57819	0.412284
CG1105-RA	CG1105	CG1105	FBtr0081645	FBgn0037465	422	1268	14.2399	11.8209	14.7078	9.97834	4.74556	9.77094	1.42708	2.49094	1.50526
CG11050-RC	CG11050	CG11050	FBtr0079293	FBgn0031836	388	1166	65.0396	77.7727	59.9113	39.8263	47.1275	38.7914	1.63308	1.65026	1.54445
Nplp2-RC	Nplp2	CG11051	FBtr0346863	FBgn0040813	119	359	14443.3	950.551	2078.82	4691.1	228.096	1320.12	3.07888	4.16732	1.57472
CG11052-RD	CG11052	CG11052	FBtr0335231	FBgn0040524	149	449	0	5.56382	0	2.93647	5.90719	0.842909	0	0.941872	0
Hsl-RB	Hsl	CG11055	FBtr0086270	FBgn0034491	881	2645	8.64696	7.93365	5.91554	6.70247	7.69877	8.04025	1.29012	1.03051	0.735741
Cals-RA	Cals	CG11059	FBtr0089207	FBgn0039928	978	2936	135.504	504.226	133.931	37.7574	45.7908	31.3406	3.5888	11.0115	4.27339
Gel-RL	Gel	CG1106	FBtr0336707	FBgn0010225	740	2222	451.541	31.4799	268.864	53.8848	22.9139	56.3578	8.37975	1.37384	4.77067
CG11060-RA	CG11060	CG11060	FBtr0089045	FBgn0033149	706	2120	0	0	0.0745503	0.845252	0.047763	0.0259495	0	0	2.8729
GM130-RA	GM130	CG11061	FBtr0071790	FBgn0034697	795	2387	11.5987	18.0009	11.9843	5.07637	7.27922	7.0226	2.28485	2.47292	1.70653
Actﾎｲ-RA	Actﾎｲ	CG11062	FBtr0089209	FBgn0024913	946	2840	5.93397	12.051	0.556502	5.3355	7.95237	3.37484	1.11217	1.51539	0.164898
jub-RE	jub	CG11063	FBtr0340292	FBgn0030530	718	2156	1.39581	3.36023	1.68603	3.54638	6.09344	3.25242	0.393588	0.55145	0.518391
apolpp-RA	apolpp	CG11064	FBtr0089188	FBgn0087002	3351	10055	2128.68	64.1247	220.322	167.122	35.0547	80.7655	12.7373	1.82928	2.72793
scaf-RB	scaf	CG11066	FBtr0086060	FBgn0033033	655	1967	73.1306	18.5425	274.392	15.4566	3.52005	37.5258	4.73134	5.26767	7.31209
CG11068-RA	CG11068	CG11068	FBtr0073854	FBgn0030536	299	899	0	0.277881	0.175803	7.41401	0.0395233	0.338556	0	7.03084	0.519272
CG11069-RA	CG11069	CG11069	FBtr0084712	FBgn0039244	604	1814	2.98615	1.10172	1.48114	1.90689	0.42855	1.0745	1.56598	2.57081	1.37845
aux-RD	aux	CG1107	FBtr0336706	FBgn0037218	1157	3473	9.87815	18.0546	5.27884	7.38509	14.5456	5.98833	1.33758	1.24124	0.88152
CG11070-RA	CG11070	CG11070	FBtr0079297	FBgn0028467	993	2981	19.7865	27.2358	12.3002	4.54488	5.08902	4.1253	4.35358	5.35188	2.98164
CG11073-RB	CG11073	CG11073	FBtr0300693	FBgn0034693	454	1364	110.314	38.4613	40.9021	52.3178	18.575	42.1861	2.10854	2.07059	0.969564
CG11076-RD	CG11076	CG11076	FBtr0344705	FBgn0039929	260	782	50.7976	93.9204	31.5285	41.1725	102.377	39.7032	1.23377	0.917401	0.794103
CG11077-RA	CG11077	CG11077	FBtr0089222	FBgn0039930	168	506	57.0948	82.449	17.4913	33.0682	58.8452	21.5558	1.72658	1.40112	0.811444
ﾎｱ-Est6-RA	ﾎｱ-Est6	CG1108	FBtr0081549	FBgn0015574	568	1706	0	0	0.0926416	1.0523	0	0.0217848	0	#DIV/0!	4.25259
PlexA-RF	PlexA	CG11081	FBtr0309865	FBgn0025741	1928	5786	19.0361	38.1674	16.6897	5.90136	9.9311	6.17349	3.22572	3.84323	2.70345
pk-RB	pk	CG11084	FBtr0089043	FBgn0003090	1029	3089	0.584533	0.808726	0.665136	1.66999	0.857546	1.03423	0.350022	0.94307	0.64312
CG11085-RA	CG11085	CG11085	FBtr0073656	FBgn0030408	295	887	1.3571	3.66133	0	0.978031	3.84911	0.673522	1.38758	0.951214	0
Gadd45-RA	Gadd45	CG11086	FBtr0089049	FBgn0033153	163	491	6.12907	21.8779	9.01284	5.4515	16.3644	17.8247	1.12429	1.33692	0.505638
CG11089-RB	CG11089	CG11089	FBtr0303476	FBgn0039241	590	1772	56.3833	19.5961	38.8873	18.2108	11.1686	20.5861	3.09614	1.75458	1.88901
Wdr33-RA	Wdr33	CG1109	FBtr0078713	FBgn0046222	807	2423	4.96801	4.53647	3.32661	4.80174	3.61659	4.08831	1.03463	1.25435	0.813688
Nup93-1-RA	Nup93-1	CG11092	FBtr0073828	FBgn0027537	823	2471	3.16648	3.13407	4.47724	2.29563	1.89175	2.08167	1.37935	1.6567	2.15079
fuss-RC	fuss	CG11093	FBtr0301336	FBgn0039932	764	2294	0.262369	0.871196	0.206687	1.12874	0.827234	0.52364	0.232444	1.05314	0.394712
dsx-RD	dsx	CG11094	FBtr0330073	FBgn0000504	549	1649	8.39485	2.57542	3.9296	3.8637	0.909351	1.59888	2.17275	2.83215	2.45772
CG11095-RA	CG11095	CG11095	FBtr0073827	FBgn0030528	283	851	4.95079	3.81622	3.15722	5.11099	7.15529	5.21814	0.968655	0.533342	0.605046
Tango1-RA	Tango1	CG11098	FBtr0079295	FBgn0286898	1430	4292	11.3588	13.7946	12.6305	10.1709	6.1362	8.87513	1.11679	2.24806	1.42313
CG11099-RB	CG11099	CG11099	FBtr0342673	FBgn0034485	378	1136	9.53674	40.2432	2.22601	21.1442	88.7517	16.515	0.451033	0.453435	0.134787
Mes2-RC	Mes2	CG11100	FBtr0078563	FBgn0037207	372	1118	9.69028	1.11724	45.6611	6.6581	1.51857	14.4282	1.45541	0.735722	3.16471
pwn-RC	pwn	CG11101	FBtr0332462	FBgn0003174	1343	4031	0.746557	0.371841	0.274455	0.645632	0.117556	0.254371	1.15632	3.16309	1.07895
CG11103-RB	CG11103	CG11103	FBtr0100218	FBgn0030522	172	518	16.2669	21.7021	19.2219	5.7262	10.8329	11.4292	2.84078	2.00336	1.68182
CG11106-RB	CG11106	CG11106	FBtr0343040	FBgn0030280	112	338	0	0	0	31.029	0.0196456	0.410927	0	0	0
Dhx15-RB	Dhx15	CG11107	FBtr0336909	FBgn0033160	729	2189	14.2976	19.8574	14.6567	10.5675	10.8236	9.37857	1.35298	1.83465	1.56278
CG11109-RA	CG11109	CG11109	FBtr0078553	FBgn0037200	358	1076	6.15299	5.80426	2.49702	5.68624	10.956	6.36628	1.08208	0.529781	0.392226
CG11110-RA	CG11110	CG11110	FBtr0086231	FBgn0034535	171	515	7.01213	13.5822	7.05839	13.2002	24.363	11.1959	0.531213	0.557492	0.630443
rdgB-RD	rdgB	CG11111	FBtr0100195	FBgn0003218	1259	3779	24.368	53.2816	19.4474	19.3295	49.1233	18.2482	1.26066	1.08465	1.06572
CG11112-RC	CG11112	CG11112	FBtr0113047	FBgn0033164	197	593	0	0	0	2.3981	0	0.0739587	0	#DIV/0!	0
CG11113-RB	CG11113	CG11113	FBtr0113048	FBgn0033165	138	416	0	0	0	1.66676	0	0.0441466	0	#DIV/0!	0
Ssl1-RB	Ssl1	CG11115	FBtr0332051	FBgn0037202	438	1316	4.57351	4.93556	4.68375	5.67223	8.15311	6.56489	0.806299	0.60536	0.713455
ﾎｱ-Est7-RA	ﾎｱ-Est7	CG1112	FBtr0081550	FBgn0015575	572	1718	213.354	15.9952	32.3821	54.18	11.0692	39.4466	3.93787	1.44502	0.82091
Mink-RA	Mink	CG11120	FBtr0084716	FBgn0039250	754	2264	0.531691	0.551713	2.51311	0.85786	0.371811	1.11102	0.619788	1.48385	2.26198
so-RA	so	CG11121	FBtr0088970	FBgn0003460	416	1250	2.889	2.19838	1.77012	4.72677	2.76376	2.51236	0.611198	0.795429	0.704564
CG11122-RA	CG11122	CG11122	FBtr0073481	FBgn0030266	3539	10619	0.226716	2.87009	0.729286	2.33462	3.19165	1.43466	0.0971106	0.899248	0.508333
CG11123-RA	CG11123	CG11123	FBtr0088971	FBgn0033169	665	1997	4.82223	6.88024	3.79882	3.33839	5.31277	2.98751	1.44448	1.29504	1.27157
sPLA2-RA	sPLA2	CG11124	FBtr0088972	FBgn0033170	186	560	73.0847	41.0411	15.5224	19.4544	10.1368	21.8785	3.75672	4.04873	0.709484
CG11125-RA	CG11125	CG11125	FBtr0088974	FBgn0033174	388	1166	3.61331	1.49975	2.84647	8.23205	2.54587	4.48305	0.438932	0.589091	0.634939
CG11127-RA	CG11127	CG11127	FBtr0088975	FBgn0033178	449	1349	12.0464	13.8889	18.0424	7.93109	7.02859	9.79707	1.51888	1.97606	1.84161
slif-RB	slif	CG11128	FBtr0078557	FBgn0037203	604	1814	7.96305	4.82003	26.4863	4.49774	0.57297	4.15346	1.77046	8.41237	6.37693
Yp3-RA	Yp3	CG11129	FBtr0073821	FBgn0004047	420	1262	14012.4	966.006	1552.54	4564.1	1255.99	2605.27	3.07013	0.769119	0.595924
CG1113-RA	CG1113	CG1113	FBtr0078779	FBgn0037304	562	1688	0	1.47995	0	0.753829	2.81	0.489666	0	0.526672	0
Rtc1-RA	Rtc1	CG11130	FBtr0073820	FBgn0020909	384	1154	10.4311	9.30855	5.61517	2.74815	2.91676	3.03589	3.79569	3.1914	1.8496
CG11131-RA	CG11131	CG11131	FBtr0078558	FBgn0037204	229	689	0	0	0.229386	0.210604	0.0423136	0.147512	0	0	1.55503
DMAP1-RA	DMAP1	CG11132	FBtr0086232	FBgn0034537	433	1301	6.93936	16.8976	9.23255	10.8792	27.0556	12.2149	0.637855	0.62455	0.75584
BoYb-RA	BoYb	CG11133	FBtr0078559	FBgn0037205	1059	3179	0.189328	0.078583	0	0.218389	0.0141035	0.0618102	0.86693	5.57186	0
CG11134-RA	CG11134	CG11134	FBtr0073818	FBgn0030518	227	683	20.2681	12.8017	14.8096	14.1721	5.79382	11.3643	1.43014	2.20954	1.30318
Lrt-RB	Lrt	CG11136	FBtr0302284	FBgn0034540	808	2426	1.73665	0.205948	0.521176	1.438	0.211201	0.89064	1.20769	0.97513	0.58517
CG11137-RA	CG11137	CG11137	FBtr0078577	FBgn0037199	166	500	107.134	232.828	118.535	78.0351	94.1849	64.0167	1.37289	2.47203	1.85163
Pits-RE	Pits	CG11138	FBtr0331718	FBgn0030400	585	1757	14.3874	34.1239	10.0747	22.2576	95.3889	26.9601	0.646407	0.357734	0.373689
p47-RA	p47	CG11139	FBtr0088997	FBgn0033179	407	1223	38.8782	45.7552	18.8674	32.194	39.6228	26.3527	1.20762	1.15477	0.715957
Aldh-III-RE	Aldh-III	CG11140	FBtr0088996	FBgn0010548	497	1493	206.403	66.0932	185.993	72.0402	31.4807	69	2.86511	2.09948	2.69555
CG11141-RA	CG11141	CG11141	FBtr0088999	FBgn0033177	710	2132	2.25844	5.74154	2.6687	3.79752	5.57628	5.09772	0.594714	1.02964	0.52351
obst-E-RA	obst-E	CG11142	FBtr0079163	FBgn0031737	242	728	25.6293	11.3241	7.5984	12.6004	3.49443	8.53051	2.03401	3.2406	0.890731
Inos-RA	Inos	CG11143	FBtr0089329	FBgn0025885	565	1697	379.496	208.744	289.643	72.145	68.8924	83.8101	5.26019	3.03	3.45595
mGluR-RB	mGluR	CG11144	FBtr0332858	FBgn0019985	976	2930	3.4921	14.1534	0.323645	2.99522	4.02836	1.60531	1.16589	3.51343	0.201609
CG11145-RA	CG11145	CG11145	FBtr0089004	FBgn0033168	149	449	0	0	0	5.68718	0	0.0696809	0	#DIV/0!	0
CG11147-RB	CG11147	CG11147	FBtr0079166	FBgn0031734	711	2135	100.923	55.2285	55.4459	26.0079	6.75842	13.9603	3.88049	8.17181	3.97169
Gyf-RD	Gyf	CG11148	FBtr0300882	FBgn0039936	1567	4703	17.2768	33.0927	12.7701	24.899	32.2755	21.3025	0.693878	1.02532	0.599464
CG11149-RD	CG11149	CG11149	FBtr0300696	FBgn0031732	475	1427	0	0	0	0.538211	0	0.0263414	0	#DIV/0!	0
Vps37B-RA	Vps37B	CG1115	FBtr0078777	FBgn0037299	214	644	33.6451	41.1187	25.5231	16.0047	15.8328	16.0339	2.1022	2.59705	1.59182
CG11151-RA	CG11151	CG11151	FBtr0073819	FBgn0030519	115	347	350.371	186.462	275.557	137.778	83.7145	133.28	2.543	2.22735	2.0675
fd102C-RA	fd102C	CG11152	FBtr0089251	FBgn0039937	599	1799	0.33456	4.1659	0.175705	0.869554	2.28942	0.520613	0.38475	1.81963	0.337496
Sox102F-RA	Sox102F	CG11153	FBtr0089252	FBgn0039938	580	1742	6.56464	9.8951	1.996	10.7384	11.3849	7.36841	0.611326	0.869141	0.270886
ATPsynﾎｲ-RA	ATPsynﾎｲ	CG11154	FBtr0089186	FBgn0010217	505	1517	1174.79	1922.11	696.989	425.355	289.772	247.741	2.7619	6.63318	2.81338
CG11155-RA	CG11155	CG11155	FBtr0089195	FBgn0039927	910	2732	11.6762	40.691	21.5203	26.5382	20.1519	18.8136	0.439977	2.01921	1.14387
mus101-RA	mus101	CG11156	FBtr0073817	FBgn0002878	1425	4277	1.54796	1.9275	1.10858	0.278273	0.305209	0.219785	5.56274	6.31534	5.04392
CG11158-RA	CG11158	CG11158	FBtr0073812	FBgn0030511	344	1034	6.985	2.89921	3.36269	4.44694	5.31288	3.58181	1.57074	0.545695	0.938826
CG11159-RA	CG11159	CG11159	FBtr0086248	FBgn0034539	146	440	0	0	0.718394	0.101557	0.107122	0.16767	0	0	4.28458
CG1116-RD	CG1116	CG1116	FBtr0334907	FBgn0037297	443	1331	4.06977	8.25836	5.22468	10.2974	9.8184	8.15677	0.395225	0.84111	0.640533
SmydA-4-RA	SmydA-4	CG11160	FBtr0073390	FBgn0030257	532	1598	1.12993	0.31266	1.28574	2.3979	0.422085	2.03042	0.471216	0.740752	0.633237
CG11162-RA	CG11162	CG11162	FBtr0073811	FBgn0030509	278	836	0	0.298822	0.378102	0.241644	0	0	0	#DIV/0!	#DIV/0!
ZnT41F-RD	ZnT41F	CG11163	FBtr0086056	FBgn0025693	498	1496	4.42555	0.667956	7.18394	7.24557	1.79212	7.17543	0.610793	0.372718	1.00119
CG11164-RA	CG11164	CG11164	FBtr0073809	FBgn0030507	340	1022	0.588918	1.71106	1.08251	1.01025	0.963203	0.653381	0.582945	1.77643	1.65678
azot-RA	azot	CG11165	FBtr0088853	FBgn0033238	148	446	0	0	0	4.71059	0.016011	0.0478431	0	0	0
Eaf-RD	Eaf	CG11166	FBtr0089007	FBgn0033166	504	1514	4.37293	10.0652	12.0049	6.73272	10.8848	7.03744	0.649504	0.924706	1.70586
CG11168-RD	CG11168	CG11168	FBtr0337009	FBgn0039249	863	2591	1.62606	2.02475	4.08689	3.63457	3.83149	3.99289	0.447387	0.52845	1.02354
CG11170-RD	CG11170	CG11170	FBtr0342983	FBgn0034705	348	1046	0.575406	3.34361	0.906577	2.36929	3.42194	3.38129	0.24286	0.977109	0.268116
NFAT-RC	NFAT	CG11172	FBtr0301449	FBgn0030505	1248	3746	7.39087	8.2027	9.99921	12.5422	7.09912	9.46513	0.58928	1.15545	1.05643
Snap29-RA	Snap29	CG11173	FBtr0072236	FBgn0034913	284	854	17.6193	35.1029	42.5652	11.6715	11.4636	17.3089	1.50959	3.06212	2.45916
Rcd6-RA	Rcd6	CG11175	FBtr0086253	FBgn0034530	513	1541	0.781148	0.486338	0	1.75137	0.456314	0.889596	0.44602	1.0658	0
Tango2-RC	Tango2	CG11176	FBtr0331722	FBgn0030503	283	851	1.41451	1.76133	1.85719	4.16169	2.28998	2.71868	0.339888	0.769147	0.683121
BthD-RA	BthD	CG11177	FBtr0073806	FBgn0030501	249	749	0.80357	0	0.21101	1.50017	0.441835	1.84223	0.535653	0	0.114541
CG11178-RB	CG11178	CG11178	FBtr0073805	FBgn0030499	707	2123	4.81953	10.1197	3.79669	4.03566	7.26113	3.00009	1.19424	1.39368	1.26553
CG11180-RA	CG11180	CG11180	FBtr0086254	FBgn0034528	726	2180	8.28267	2.75026	3.04493	12.0604	17.1029	18.0839	0.686765	0.160807	0.168378
cup-RB	cup	CG11181	FBtr0290322	FBgn0000392	1117	3353	0.179503	1.19208	2.30966	7.66871	3.24095	3.69786	0.0234072	0.367819	0.624593
PHDP-RA	PHDP	CG11182	FBtr0072224	FBgn0025334	220	662	0.909176	2.64155	0.238741	0.495062	2.94134	0.244142	1.83649	0.898079	0.977878
DCP1-RA	DCP1	CG11183	FBtr0072223	FBgn0034921	372	1118	18.3039	25.92	11.1679	6.34068	9.62753	5.90172	2.88673	2.69228	1.89231
Upf3-RD	Upf3	CG11184	FBtr0343302	FBgn0034923	492	1478	5.70111	6.59188	4.27731	4.3856	9.17379	4.84701	1.29996	0.718556	0.882463
toy-RC	toy	CG11186	FBtr0339509	FBgn0019650	526	1580	9.52333	34.6263	2.50074	10.4494	21.0298	6.69715	0.911378	1.64653	0.373403
Aatf-RA	Aatf	CG11188	FBtr0079299	FBgn0031851	488	1466	6.56889	10.5652	3.77328	5.07255	11.4183	7.23372	1.29499	0.925285	0.521624
Gnf1-RA	Gnf1	CG1119	FBtr0078837	FBgn0004913	986	2960	4.67673	5.57021	4.5385	3.86962	6.5184	3.50658	1.20857	0.854536	1.29428
PIG-T-RA	PIG-T	CG11190	FBtr0071175	FBgn0030035	633	1901	24.6955	25.2312	26.1055	9.51354	10.1026	13.6403	2.59583	2.49749	1.91385
CG11191-RA	CG11191	CG11191	FBtr0088868	FBgn0033249	303	911	3.96405	32.9065	1.04092	18.7735	141.672	11.3145	0.211151	0.232272	0.091999
CG11192-RB	CG11192	CG11192	FBtr0290122	FBgn0034507	279	839	0	0	0	0.48578	0	0	0	#DIV/0!	#DIV/0!
Hey-RA	Hey	CG11194	FBtr0088869	FBgn0027788	425	1277	0.471319	1.17376	0.371292	0.592364	1.08899	0.248943	0.795658	1.07785	1.49147
Dic3-RA	Dic3	CG11196	FBtr0088870	FBgn0033248	287	863	0	0	0.183136	3.06151	0	0.0499461	0	#DIV/0!	3.66668
ACC-RE	ACC	CG11198	FBtr0339123	FBgn0033246	2348	7046	155.466	26.4848	44.9287	22.1698	13.8776	24.9044	7.01251	1.90846	1.80405
Liprin-ﾎｱ-RC	Liprin-ﾎｱ	CG11199	FBtr0329941	FBgn0046704	1158	3476	5.19454	10.2053	2.90995	5.15933	8.34558	4.64955	1.00682	1.22285	0.625856
IntS10-RA	IntS10	CG1120	FBtr0073148	FBgn0035462	631	1895	2.85851	5.66863	3.66968	1.08494	1.53765	1.05185	2.63471	3.68656	3.48878
CG11200-RC	CG11200	CG11200	FBtr0344185	FBgn0034500	355	1067	34.4089	15.2184	18.0709	11.9103	3.17335	8.58359	2.889	4.79568	2.10529
TTLL3B-RB	TTLL3B	CG11201	FBtr0300056	FBgn0031853	756	2270	0	0	0.208872	4.18821	0.0698764	0.308229	0	0	0.677653
org-1-RA	org-1	CG11202	FBtr0071244	FBgn0021767	699	2099	0.286743	0.357049	0.301185	0.10861	0	0.00326026	2.64013	#DIV/0!	92.3806
phr-RB	phr	CG11205	FBtr0088839	FBgn0003082	535	1607	0.374533	5.59636	2.95047	1.31683	18.8526	13.1078	0.284421	0.296849	0.225093
Liprin-ﾎｳ-RA	Liprin-ﾎｳ	CG11206	FBtr0071846	FBgn0034720	1023	3071	4.11571	13.0155	5.04349	23.1703	39.3786	16.435	0.177629	0.330521	0.306875
feo-RA	feo	CG11207	FBtr0073410	FBgn0030241	671	2015	0	0.991823	1.09809	1.88723	0.459702	0.981771	0	2.15753	1.11848
Hacl-RA	Hacl	CG11208	FBtr0086322	FBgn0034488	568	1706	25.4015	17.572	17.6946	7.91351	7.93397	8.3814	3.20989	2.21478	2.11117
ppk6-RA	ppk6	CG11209	FBtr0086321	FBgn0034489	498	1496	0	0	0	0.0546635	0.00617779	0	0	0	#DIV/0!
ﾎｱ-Est8-RA	ﾎｱ-Est8	CG1121	FBtr0081553	FBgn0015576	574	1724	80.2964	15.215	40.3367	19.9494	3.9799	11.3899	4.025	3.82296	3.54145
Tmem63-RA	Tmem63	CG11210	FBtr0088781	FBgn0033259	760	2282	28.7486	33.0606	32.6205	7.05848	4.93705	9.01082	4.07292	6.69642	3.62015
CG11211-RA	CG11211	CG11211	FBtr0086005	FBgn0033067	176	530	148.765	49.4917	599.683	37.4487	5.80665	113.381	3.97251	8.52328	5.28911
Ptr-RA	Ptr	CG11212	FBtr0086003	FBgn0262867	1169	3509	3.94503	0.569542	12.0708	1.94252	0.448824	3.74053	2.03088	1.26897	3.22704
Cp38-RB	Cp38	CG11213	FBtr0300448	FBgn0000360	306	920	0	27.4254	0.515369	99.1228	1.20563	0.0400289	0	22.7477	12.8749
CanB2-RB	CanB2	CG11217	FBtr0309866	FBgn0015614	170	512	59.9523	41.4733	59.2675	36.8825	43.1366	28.7217	1.6255	0.96144	2.06351
Obp56d-RA	Obp56d	CG11218	FBtr0086477	FBgn0034470	131	395	3004.8	806.366	927.073	573.664	69.3381	310.771	5.23791	11.6295	2.98314
PIP82-RA	PIP82	CG11219	FBtr0071235	FBgn0024943	1195	3587	20.4708	49.8656	3.12833	15.2066	53.9999	14.9585	1.34618	0.923438	0.209134
meng-RB	meng	CG11221	FBtr0339237	FBgn0031855	456	1370	7.90784	18.9641	2.19189	9.30869	30.8617	4.14736	0.849511	0.614486	0.528502
CG11226-RA	CG11226	CG11226	FBtr0078546	FBgn0037195	196	590	0	0	0	3.58373	0.0637102	0.181309	0	0	0
CG11227-RC	CG11227	CG11227	FBtr0077275	FBgn0031139	183	551	0	0	0	0.818058	0	0.016555	0	#DIV/0!	0
hpo-RB	hpo	CG11228	FBtr0331920	FBgn0261456	669	2009	13.7811	15.2948	9.44032	3.97573	3.78428	3.25224	3.46631	4.04167	2.90271
CG11236-RA	CG11236	CG11236	FBtr0079339	FBgn0031860	341	1025	36.9932	3.41211	5.55091	6.29921	1.17305	4.28417	5.87268	2.90876	1.29568
Oseg6-RA	Oseg6	CG11237	FBtr0086501	FBgn0034452	1366	4100	0.587194	0.182792	0.038548	0.215802	0.271761	0.222102	2.72099	0.672619	0.17356
l(3)04053-RA	l(3)04053	CG11238	FBtr0078535	FBgn0010830	585	1757	4.45325	10.2372	4.22777	7.37537	17.4918	7.96616	0.6038	0.585254	0.530716
CG1124-RA	CG1124	CG1124	FBtr0078841	FBgn0037290	246	740	204.963	52.6638	58.7335	48.374	7.37626	23.7974	4.23704	7.13964	2.46806
CG11241-RA	CG11241	CG11241	FBtr0078536	FBgn0037186	508	1526	10.6492	3.76524	12.8426	4.31343	1.77315	4.79151	2.46883	2.12348	2.68028
TBCB-RA	TBCB	CG11242	FBtr0086502	FBgn0034451	244	734	15.5799	36.0769	21.7476	10.6655	14.602	11.4142	1.46077	2.47067	1.90531
Rpb8-RA	Rpb8	CG11246	FBtr0078432	FBgn0037121	149	449	30.831	46.7361	25.3438	12.2909	13.274	9.26228	2.50844	3.52088	2.73624
CG11247-RD	CG11247	CG11247	FBtr0332769	FBgn0037120	326	980	3.07079	13.5104	6.28961	15.3721	43.0939	20.8522	0.199764	0.313511	0.301628
CG11248-RB	CG11248	CG11248	FBtr0078430	FBgn0037117	830	2492	3.86436	4.41087	1.83923	3.7443	11.5836	3.41645	1.03206	0.380785	0.538344
CG11249-RA	CG11249	CG11249	FBtr0078429	FBgn0037115	642	1928	0	0	0.163949	1.83129	0	0.00473896	0	#DIV/0!	34.5959
CG11251-RA	CG11251	CG11251	FBtr0075891	FBgn0036346	338	1016	0	0	0.155558	2.78188	0	0.0287954	0	#DIV/0!	5.40217
Zmynd10-RA	Zmynd10	CG11253	FBtr0075894	FBgn0266709	451	1355	0	0	0	1.40927	0.013412	0.0333975	0	0	0
mael-RA	mael	CG11254	FBtr0089633	FBgn0016034	459	1379	2.18229	1.2681	0.11461	2.07047	0.507938	0.409291	1.054	2.49656	0.28002
AdenoK-RB	AdenoK	CG11255	FBtr0075896	FBgn0036337	345	1037	65.5851	28.6673	37.4923	29.0597	15.822	36.3201	2.25691	1.81187	1.03227
CG11257-RA	CG11257	CG11257	FBtr0086525	FBgn0034442	535	1607	2.99626	2.02091	1.08184	1.44772	1.54265	1.37358	2.06964	1.31003	0.787603
mRpL20-RA	mRpL20	CG11258	FBtr0075897	FBgn0036335	150	452	45.2737	69.6388	33.5674	15.6777	33.4019	18.8357	2.88777	2.08488	1.78211
MICAL-like-RA	MICAL-like	CG11259	FBtr0075898	FBgn0036333	1010	3032	7.14626	9.96955	7.08916	6.41008	9.65912	7.69972	1.11485	1.03214	0.920704
BBS5-RA	BBS5	CG1126	FBtr0078872	FBgn0037280	381	1145	0	1.0909	0	0.488266	0.874725	0.130283	0	1.24713	0
Cul6-RA	Cul6	CG11261	FBtr0075899	FBgn0036332	670	2012	1.79485	1.24163	1.72814	1.06273	0.403369	0.916406	1.68891	3.07814	1.88578
CG11262-RA	CG11262	CG11262	FBtr0075872	FBgn0036329	702	2108	0	0	0	1.06952	0	0	0	#DIV/0!	#DIV/0!
CG11263-RB	CG11263	CG11263	FBtr0300699	FBgn0036330	265	797	0.755175	0.626889	0.198302	0.131015	0.0197422	0.0688245	5.76403	31.7538	2.88127
Trf4-1-RG	Trf4-1	CG11265	FBtr0112964	FBgn0030049	802	2408	5.7488	13.6942	4.92255	16.262	31.8246	17.8993	0.353512	0.430303	0.275013
Caper-RK	Caper	CG11266	FBtr0344711	FBgn0031883	22	68	35.4044	18.3688	11.6211	58.1832	44.1935	39.1257	0.608498	0.415644	0.297019
CG11267-RA	CG11267	CG11267	FBtr0075875	FBgn0036334	103	311	195.464	274.717	111.293	155.076	197.314	93.225	1.26044	1.39229	1.19381
ste14-RB	ste14	CG11268	FBtr0332075	FBgn0036336	299	899	5.35594	2.22305	4.74667	2.71398	0.985084	2.84545	1.97347	2.25671	1.66816
CG11269-RA	CG11269	CG11269	FBtr0071765	FBgn0034700	107	323	0	0	0	0.276896	0	0	0	#DIV/0!	#DIV/0!
RpS12-RB	RpS12	CG11271	FBtr0075878	FBgn0286213	139	419	254.252	146.67	146.731	1195.41	966.486	1176.33	0.21269	0.151756	0.124735
SRm160-RA	SRm160	CG11274	FBtr0075883	FBgn0036340	954	2864	8.40606	19.7131	4.96655	6.38266	14.9726	5.46565	1.31702	1.31661	0.908684
CG11275-RA	CG11275	CG11275	FBtr0071769	FBgn0034706	417	1253	18.2532	5.98122	14.5055	14.52	3.94558	17.4926	1.2571	1.51593	0.829234
RpS4-RA	RpS4	CG11276	FBtr0075884	FBgn0011284	261	785	318.188	181.395	200.528	1018.16	1008.02	1170.23	0.312514	0.179952	0.171358
Syx13-RA	Syx13	CG11278	FBtr0075886	FBgn0036341	284	854	20.4384	42.7085	24.4288	16.327	24.4631	19.0442	1.25182	1.74583	1.28274
CG11279-RA	CG11279	CG11279	FBtr0075887	FBgn0036342	102	308	21.4955	56.7762	29.762	18.4731	21.4548	12.9415	1.16361	2.64631	2.29974
ﾎｱ-Est9-RD	ﾎｱ-Est9	CG1128	FBtr0302355	FBgn0015577	587	1763	36.529	5.80966	70.731	9.49344	7.13329	16.7802	3.84781	0.814444	4.21516
trn-RB	trn	CG11280	FBtr0330075	FBgn0010452	751	2255	5.33813	14.9557	1.68209	4.44801	5.53706	2.48717	1.20012	2.70102	0.676307
snky-RB	snky	CG11281	FBtr0334063	FBgn0086916	715	2147	0	0	0	0.268634	0	0.0179197	0	#DIV/0!	0
caps-RB	caps	CG11282	FBtr0075833	FBgn0023095	540	1622	21.522	24.6427	22.3136	10.0959	8.49012	8.5797	2.13177	2.90252	2.60074
CAH3-RD	CAH3	CG11284	FBtr0331731	FBgn0030056	250	752	15.2069	9.63384	29.8439	16.3121	15.1435	25.0344	0.932248	0.636168	1.19212
CG11286-RA	CG11286	CG11286	FBtr0081779	FBgn0037516	191	575	0	0	0	1.88147	0.0128869	0.0256719	0	0	0
Ugt307A1-RB	Ugt307A1	CG11289	FBtr0289952	FBgn0031887	502	1508	0	0	0	0	0.0132702	0.0264355	#DIV/0!	0	0
CG1129-RD	CG1129	CG1129	FBtr0345174	FBgn0037279	369	1109	17.367	15.0925	18.5267	6.37833	5.35574	5.53927	2.72281	2.81801	3.3446
enok-RA	enok	CG11290	FBtr0072250	FBgn0034975	2291	6875	5.16518	7.73974	4.78163	3.26401	6.95282	3.06687	1.58246	1.11318	1.55912
CG11291-RA	CG11291	CG11291	FBtr0071773	FBgn0034713	308	926	0	0	0	6.08959	0	0.0546832	0	#DIV/0!	0
CG11294-RB	CG11294	CG11294	FBtr0331456	FBgn0030058	261	785	1.53344	16.8665	0.201333	4.30036	14.0669	1.8279	0.356583	1.19902	0.110145
l(2)dtl-RA	l(2)dtl	CG11295	FBtr0072085	FBgn0013548	769	2309	1.04266	1.62288	0.889825	2.26005	2.38391	1.66214	0.461343	0.680765	0.53535
CG11298-RA	CG11298	CG11298	FBtr0071819	FBgn0034721	152	458	0	0	0	7.02508	0	0.0175733	0	#DIV/0!	0
Sesn-RD	Sesn	CG11299	FBtr0343268	FBgn0034897	467	1403	18.4466	7.47844	14.3064	27.5601	18.0254	40.2066	0.669322	0.414883	0.355823
scrt-RB	scrt	CG1130	FBtr0333136	FBgn0004880	653	1961	9.51459	34.9054	1.37011	30.2138	104.448	23.4758	0.314908	0.33419	0.0583627
CG11300-RA	CG11300	CG11300	FBtr0072090	FBgn0034901	157	473	0	1.0563	0.334137	0.191111	0	0.533521	0	#DIV/0!	0.626286
Mes4-RA	Mes4	CG11301	FBtr0071827	FBgn0034726	155	467	11.5993	24.0722	7.44545	8.5837	36.3341	20.1155	1.35132	0.662523	0.370134
TM4SF-RA	TM4SF	CG11303	FBtr0072130	FBgn0020372	286	860	75.5842	440.372	13.2318	78.1969	257.92	56.5456	0.966588	1.7074	0.234002
Sirt7-RA	Sirt7	CG11305	FBtr0085364	FBgn0039631	771	2315	0.259989	1.8345	0.409624	1.56858	3.59142	1.17388	0.165748	0.5108	0.34895
Alg11-RA	Alg11	CG11306	FBtr0078422	FBgn0037108	475	1427	24.0412	28.0101	22.9262	20.6726	27.8302	22.0392	1.16295	1.00647	1.04024
CG11307-RC	CG11307	CG11307	FBtr0301160	FBgn0037106	404	1214	3.96622	9.26004	3.64523	5.72025	4.3767	2.56086	0.693365	2.11576	1.42344
sa-RA	sa	CG11308	FBtr0078401	FBgn0002842	275	827	0	0	0	1.37052	0.0210019	0.0941348	0	0	0
CG11309-RE	CG11309	CG11309	FBtr0331798	FBgn0037070	348	1046	83.4338	13.6133	26.4418	24.2142	9.48951	19.0201	3.44566	1.43456	1.39021
ﾎｱ-Est10-RD	ﾎｱ-Est10	CG1131	FBtr0305911	FBgn0015569	550	1652	20.4025	7.25856	8.22761	7.96102	1.55626	3.37046	2.5628	4.6641	2.44109
Cpr78Ca-RA	Cpr78Ca	CG11310	FBtr0078409	FBgn0037067	127	383	0	0	0.412654	0.152103	0.0229199	0.0114146	0	0	36.1514
insc-RA	insc	CG11312	FBtr0071562	FBgn0011674	859	2579	1.16688	0.774922	2.39	1.1712	0.379655	1.1499	0.996309	2.04112	2.07845
CG11313-RC	CG11313	CG11313	FBtr0335451	FBgn0039798	367	1103	0	0	0.286576	0.109845	0	0.00824337	0	#DIV/0!	34.7644
Npc2g-RB	Npc2g	CG11314	FBtr0306293	FBgn0039800	159	479	657.161	40.1582	96.3457	378.12	62.811	196.809	1.73797	0.63935	0.48954
Npc2h-RC	Npc2h	CG11315	FBtr0306292	FBgn0039801	157	473	343.565	31.6891	72.1735	113.9	21.0531	110.025	3.01638	1.5052	0.655975
CG11317-RA	CG11317	CG11317	FBtr0085741	FBgn0039816	295	887	2.7142	27.6008	0.534543	14.9202	85.0986	16.4834	0.181915	0.324339	0.0324292
CG11318-RA	CG11318	CG11318	FBtr0085739	FBgn0039818	802	2408	0	0.103744	0.131268	0.32941	0.00363202	0.010853	0	28.5637	12.0951
CG11319-RC	CG11319	CG11319	FBtr0343160	FBgn0031835	935	2807	13.294	38.4468	1.80174	8.33079	10.2443	3.91808	1.59577	3.75298	0.459853
FoxL1-RA	FoxL1	CG1132	FBtr0073192	FBgn0004895	365	1097	0	0	0	0.0809295	0	0	0	#DIV/0!	#DIV/0!
DIP-ﾎｹ-RB	DIP-ﾎｹ	CG11320	FBtr0113026	FBgn0031837	376	1130	1.06526	0.221076	0	0.167348	0.400951	0.105493	6.36557	0.551378	0
LUBEL-RJ	LUBEL	CG11321	FBtr0331221	FBgn0031857	2798	8396	0.573487	0.357049	0.621193	5.02439	0.429466	2.14333	0.114141	0.83138	0.289826
CG11322-RB	CG11322	CG11322	FBtr0290242	FBgn0031856	480	1442	0	0	0	0.654259	0.00568777	0.0793139	0	0	0
TTLL3A-RA	TTLL3A	CG11323	FBtr0079305	FBgn0031854	992	2978	0	0.419435	0	0.173267	1.01825	0.175539	0	0.411917	0
homer-RD	homer	CG11324	FBtr0329892	FBgn0025777	394	1184	51.3423	110.349	27.3645	23.0124	41.3336	20.5184	2.23107	2.66972	1.33366
AkhR-RA	AkhR	CG11325	FBtr0079308	FBgn0025595	443	1331	99.9355	4.12918	5.8184	32.1243	5.59035	21.633	3.11091	0.738626	0.26896
Tsp-RE	Tsp	CG11326	FBtr0079314	FBgn0031850	419	1259	74.577	21.8266	90.2586	26.9387	8.77454	35.7264	2.7684	2.48749	2.52639
CG11327-RA	CG11327	CG11327	FBtr0079315	FBgn0031849	475	1427	0	0	0.332263	5.22013	0.011105	0.143794	0	0	2.31069
Nhe3-RE	Nhe3	CG11328	FBtr0273248	FBgn0028703	687	2063	32.0922	79.8005	23.1362	18.9044	21.1528	15.3884	1.6976	3.77258	1.50348
Nse1-RA	Nse1	CG11329	FBtr0079319	FBgn0031848	235	707	0.851307	0	1.56482	1.32692	0.113178	0.777842	0.641568	0	2.01174
opa-RA	opa	CG1133	FBtr0078836	FBgn0003002	609	1829	2.96166	2.18537	5.2711	1.45075	1.3219	2.54148	2.04146	1.65321	2.07403
cort-RB	cort	CG11330	FBtr0333350	FBgn0000351	483	1451	0.4148	0.172168	0.108923	0.825593	0.474428	0.321336	0.502426	0.362895	0.338968
Spn27A-RA	Spn27A	CG11331	FBtr0079321	FBgn0028990	447	1343	56.0196	19.7174	41.1886	23.396	8.59289	27.0469	2.39441	2.29461	1.52286
CG11333-RA	CG11333	CG11333	FBtr0085789	FBgn0039850	204	614	0	0	0.257405	2.42259	0	0.0139849	0	#DIV/0!	18.4059
CG11334-RC	CG11334	CG11334	FBtr0334556	FBgn0039849	364	1094	17.0549	7.07886	15.6024	15.8185	9.26053	18.3609	1.07816	0.764413	0.849764
Loxl1-RA	Loxl1	CG11335	FBtr0085810	FBgn0039848	360	1082	0	0.230883	0	1.03685	1.76293	0.320532	0	0.130966	0
PNPase-RD	PNPase	CG11337	FBtr0300881	FBgn0039846	771	2315	3.63984	1.8345	1.29714	2.10184	3.12092	2.21181	1.73174	0.587806	0.586463
Mul1-RA	Mul1	CG1134	FBtr0073193	FBgn0035483	338	1016	4.14677	7.37644	6.68898	8.0004	6.52984	5.34171	0.51832	1.12965	1.25222
pHCl-2-RA	pHCl-2	CG11340	FBtr0085766	FBgn0039840	526	1580	0	0.316222	0.10003	0.336471	0.00894733	0.0490157	0	35.3426	2.04076
CG11342-RA	CG11342	CG11342	FBtr0073338	FBgn0035537	238	716	1.68121	2.44233	1.98662	1.81799	3.23534	2.56975	0.924766	0.754892	0.77308
CG11345-RA	CG11345	CG11345	FBtr0073334	FBgn0035546	242	728	0	1.02946	0.868388	0.0481193	0.0217528	0.0758337	0	47.3254	11.4512
DOR-RB	DOR	CG11347	FBtr0073295	FBgn0035542	387	1163	84.3555	80.9806	89.9629	179.194	202.954	242.742	0.47075	0.399009	0.370612
nAChRﾎｲ1-RA	nAChRﾎｲ1	CG11348	FBtr0073299	FBgn0000038	521	1565	26.1517	107.907	2.01977	75.1429	55.2262	32.6113	0.348026	1.95392	0.0619346
CG11349-RB	CG11349	CG11349	FBtr0303005	FBgn0035550	629	1889	1.5931	1.19023	105.671	0.0338179	0.0203836	3.99968	47.1083	58.3915	26.4199
Rcd5-RA	Rcd5	CG1135	FBtr0073202	FBgn0263832	578	1736	9.36095	15.3976	8.92199	15.4206	26.8065	17.6617	0.607041	0.574398	0.505161
CG11350-RC	CG11350	CG11350	FBtr0331399	FBgn0035552	456	1370	0	0	0	0.0148344	0.020118	0.013359	0	0	0
jim-RI	jim	CG11352	FBtr0333213	FBgn0027339	792	2378	7.84613	13.6569	6.91205	31.4442	22.746	13.1767	0.249526	0.600407	0.524564
CG11353-RA	CG11353	CG11353	FBtr0073308	FBgn0035557	754	2264	0.797537	0.551713	0.698086	0.434984	0.0137992	0.130574	1.83349	39.9815	5.34629
Lim1-RB	Lim1	CG11354	FBtr0331732	FBgn0026411	347	1043	4.03942	15.0895	1.51531	9.33222	40.0667	7.88712	0.432847	0.376611	0.192124
CG11356-RA	CG11356	CG11356	FBtr0073635	FBgn0030375	248	746	0	0	0	0.0285805	0.0646004	0.102952	0	0	0
CG11357-RB	CG11357	CG11357	FBtr0113142	FBgn0035558	434	1304	6.00028	12.4525	1.33322	11.3709	20.4101	8.70955	0.527689	0.610111	0.153075
CG1136-RA	CG1136	CG1136	FBtr0073203	FBgn0035490	458	1376	11.81	4.72035	4.70924	4.10634	1.29199	2.80303	2.87605	3.65355	1.68005
CG11360-RC	CG11360	CG11360	FBtr0310539	FBgn0039920	628	1886	1.59564	8.74222	1.3408	3.93397	3.00356	2.07572	0.405605	2.91062	0.645945
CG11362-RA	CG11362	CG11362	FBtr0071836	FBgn0034737	111	335	0	0.745718	0	3.45443	0.0262455	0.248346	0	28.4132	0
CG11367-RA	CG11367	CG11367	FBtr0078528	FBgn0037185	362	1088	1.10639	4.13298	2.76001	4.2782	7.0373	4.99404	0.25861	0.587296	0.55266
CG11368-RA	CG11368	CG11368	FBtr0071058	FBgn0040923	65	197	2080.59	91.3031	89.8539	841.777	74.0265	241.421	2.47167	1.23338	0.372187
CG11369-RA	CG11369	CG11369	FBtr0071067	FBgn0029951	667	2003	0	0	0	1.2636	0	0	0	#DIV/0!	#DIV/0!
CG1137-RA	CG1137	CG1137	FBtr0081705	FBgn0037454	379	1139	0.528423	0	0	9.36835	0.0662877	0.337464	0.0564052	0	0
CG11370-RB	CG11370	CG11370	FBtr0330172	FBgn0037181	341	1025	0	0	0.308384	0.152801	0.038375	0.206406	0	0	1.49407
dbr-RD	dbr	CG11371	FBtr0306537	FBgn0067779	1007	3023	5.97295	3.96664	4.80989	7.06242	6.90986	7.43145	0.845737	0.574054	0.647234
galectin-RD	galectin	CG11372	FBtr0306540	FBgn0031213	401	1205	40.9574	41.8778	33.0521	38.4664	35.8452	38.6963	1.06476	1.16829	0.854141
CG11373-RA	CG11373	CG11373	FBtr0078657	FBgn0040679	59	179	0	0	0	28.0836	0	0.250677	0	#DIV/0!	0
CG11374-RC	CG11374	CG11374	FBtr0306541	FBgn0031214	401	1205	0	0	0	0.483463	0.196698	0.108845	0	0	0
polybromo-RA	polybromo	CG11375	FBtr0084740	FBgn0039227	1654	4964	4.48617	5.98873	3.18386	2.92826	6.1363	2.47294	1.53203	0.97595	1.28748
Zir-RA	Zir	CG11376	FBtr0078103	FBgn0031216	2064	6194	4.76136	7.74371	2.373	5.07169	4.26917	3.57137	0.938811	1.81387	0.66445
CG11377-RA	CG11377	CG11377	FBtr0078104	FBgn0031217	374	1124	25.1673	32.6716	34.4497	7.44912	6.7222	7.73154	3.37857	4.86025	4.45573
CG11378-RA	CG11378	CG11378	FBtr0070197	FBgn0040364	312	938	32.7245	11.1858	75.148	18.5213	4.71385	23.8347	1.76686	2.37296	3.15289
CG11379-RA	CG11379	CG11379	FBtr0070198	FBgn0040362	201	605	0	0	0	3.4601	0	0.0766223	0	#DIV/0!	0
CG1138-RA	CG1138	CG1138	FBtr0081703	FBgn0037456	290	872	0	0	0	1.96973	0	0.00715251	0	#DIV/0!	0
CG11380-RA	CG11380	CG11380	FBtr0070201	FBgn0040359	569	1709	0	0.438529	0.184958	0.106765	0.0334135	0.055469	0	13.1243	3.33444
CG11381-RA	CG11381	CG11381	FBtr0070203	FBgn0029568	436	1310	0	2.09769	0	3.39409	0.0313129	0.0249512	0	66.9912	0
CG11382-RC	CG11382	CG11382	FBtr0342728	FBgn0040367	505	1517	0	0.494032	0	0.114601	0.00575625	0	0	85.8252	#DIV/0!
CG11384-RA	CG11384	CG11384	FBtr0070251	FBgn0040363	588	1766	0	0	0	0.102858	0	0.0138942	0	#DIV/0!	0
ct-RE	ct	CG11387	FBtr0331733	FBgn0004198	2174	6524	6.27337	9.34319	10.4412	9.58516	19.6575	15.176	0.654487	0.475299	0.688006
Xxylt-RA	Xxylt	CG11388	FBtr0072162	FBgn0034959	458	1376	9.62299	22.694	4.02008	32.3147	108.572	24.4886	0.29779	0.209022	0.164161
CG1139-RA	CG1139	CG1139	FBtr0072845	FBgn0035300	451	1355	0	0.737463	1.1664	0.351823	0	0.120396	0	#DIV/0!	9.68799
EbpIII-RA	EbpIII	CG11390	FBtr0072164	FBgn0011695	126	380	6525.58	3897.12	3958.24	1437.24	415.844	1169.16	4.54034	9.3716	3.38555
CG11391-RA	CG11391	CG11391	FBtr0083789	FBgn0038732	542	1628	4.06672	0.460348	1.74744	0.592188	0.033463	0.47774	6.86727	13.7569	3.65773
Gbp2-RA	Gbp2	CG11395	FBtr0086987	FBgn0034200	456	1370	179.244	14.4054	31.6093	43.0069	8.50822	33.4759	4.1678	1.69312	0.944241
CG11396-RA	CG11396	CG11396	FBtr0078276	FBgn0037022	484	1454	14.0741	22.6793	8.04364	8.89115	21.4259	8.2442	1.58293	1.05849	0.975673
glu-RA	glu	CG11397	FBtr0080935	FBgn0015391	1409	4229	2.13481	2.36288	0.859558	1.45395	2.48253	1.23857	1.46829	0.951805	0.693995
CG11398-RA	CG11398	CG11398	FBtr0070250	FBgn0040366	329	989	2.43427	1.76816	1.91765	2.95696	5.4279	3.64464	0.823235	0.325754	0.526158
CG11399-RB	CG11399	CG11399	FBtr0078277	FBgn0037021	920	2762	6.53737	14.562	4.17719	6.06596	12.2265	5.13594	1.07771	1.19102	0.813326
SCOT-RA	SCOT	CG1140	FBtr0072844	FBgn0035298	516	1550	30.6762	5.15748	14.1732	15.9268	6.27999	14.4615	1.92607	0.821256	0.980063
CG11400-RA	CG11400	CG11400	FBtr0086985	FBgn0034198	198	596	85.8378	15.5087	17.767	39.5678	8.25021	30.26	2.16938	1.87979	0.587143
Trxr-2-RA	Trxr-2	CG11401	FBtr0078514	FBgn0037170	516	1550	1.94153	1.45054	1.52948	0.953146	0	0	2.03697	#DIV/0!	#DIV/0!
CG11403-RA	CG11403	CG11403	FBtr0070245	FBgn0026876	861	2585	0	0.483202	0.0611399	0.591676	0.986522	0.820005	0	0.489803	0.0745604
CG11404-RA	CG11404	CG11404	FBtr0078513	FBgn0037169	189	569	0	0	0	4.05017	0	0.0496239	0	#DIV/0!	0
Atf3-RA	Atf3	CG11405	FBtr0070244	FBgn0028550	613	1841	8.1732	3.79947	13.7357	10.8269	7.49238	15.2016	0.754895	0.507112	0.903568
CG11406-RB	CG11406	CG11406	FBtr0100169	FBgn0034990	396	1190	0	1.04964	0	0.717936	0.995777	0.433471	0	1.0541	0
CG11407-RA	CG11407	CG11407	FBtr0083790	FBgn0038733	538	1616	26.8162	20.4057	30.3183	19.8113	5.67319	14.4315	1.35358	3.59687	2.10084
CG11409-RC	CG11409	CG11409	FBtr0342730	FBgn0024366	1279	3839	0	0.455511	0.61753	0.434343	0.0936082	0.325196	0	4.86615	1.89895
fs(1)N-RA	fs(1)N	CG11411	FBtr0070207	FBgn0004650	2118	6356	0	0.196519	0.0248657	0.668135	0.048814	0.0805285	0	4.02588	0.308782
Naa30A-RD	Naa30A	CG11412	FBtr0310619	FBgn0024362	358	1076	7.83108	7.66163	6.60976	15.0615	25.4026	18.9276	0.51994	0.301608	0.349212
CG11413-RA	CG11413	CG11413	FBtr0072305	FBgn0035022	142	428	8.43749	4.08577	5.53902	6.41865	2.08449	8.05584	1.31453	1.96008	0.687578
CG11414-RA	CG11414	CG11414	FBtr0072307	FBgn0035024	867	2603	10.405	10.0771	8.80398	8.04378	11.8778	10.2604	1.29355	0.848394	0.858053
Tsp2A-RB	Tsp2A	CG11415	FBtr0303284	FBgn0024361	244	734	0	2.72278	0.645967	10.7131	0.56262	1.31858	0	4.83947	0.489897
uri-RA	uri	CG11416	FBtr0072308	FBgn0035025	731	2195	1.09681	1.36573	2.23209	1.95528	3.24951	2.80709	0.560948	0.420289	0.795161
CG11417-RA	CG11417	CG11417	FBtr0070212	FBgn0024364	771	2315	2.85988	3.88482	1.97985	4.65807	7.5455	6.0605	0.613962	0.514852	0.326681
MTPAP-RB	MTPAP	CG11418	FBtr0070237	FBgn0024360	288	866	2.08501	2.30776	0.547506	4.38	6.42227	3.5805	0.476031	0.359338	0.152913
APC10-RA	APC10	CG11419	FBtr0086951	FBgn0034231	195	587	3.07602	12.7674	6.46187	5.94237	8.3947	6.15868	0.517641	1.52089	1.04923
CG1142-RA	CG1142	CG1142	FBtr0081559	FBgn0037504	281	845	13.5333	13.8951	8.41668	11.262	19.3726	10.6578	1.20168	0.717255	0.789722
png-RA	png	CG11420	FBtr0070234	FBgn0000826	291	875	0	0.285503	0	1.79411	0.261336	0.771932	0	1.09248	0
Obp83a-RC	Obp83a	CG11421	FBtr0345251	FBgn0011281	174	524	10.3375	0.953494	0.301616	2.0777	2.28101	0.765432	4.97548	0.418013	0.394046
Obp83b-RA	Obp83b	CG11422	FBtr0078655	FBgn0010403	141	425	5.6647	6.46581	1.85937	1.68235	2.11045	0.587075	3.36713	3.06371	3.16718
ND-51L1-RA	ND-51L1	CG11423	FBtr0086834	FBgn0034251	702	2108	0	0.118508	0	0.787558	0.00468451	0.0419939	0	25.2979	0
CG11425-RA	CG11425	CG11425	FBtr0078507	FBgn0037167	305	917	15.0961	9.53494	16.5458	5.6964	2.22304	10.0092	2.65011	4.28914	1.65305
CG11426-RA	CG11426	CG11426	FBtr0078506	FBgn0037166	340	1022	5.30026	2.19994	47.0119	9.34537	7.38249	38.9183	0.567154	0.297994	1.20796
rb-RA	rb	CG11427	FBtr0070702	FBgn0003210	1160	3482	8.29695	8.3224	5.85526	11.5626	18.574	17.0982	0.717566	0.448068	0.342449
CG1143-RA	CG1143	CG1143	FBtr0072937	FBgn0035359	296	890	20.9642	1.40346	1.24306	12.7016	1.21968	3.52309	1.65051	1.15068	0.352834
olf186-F-RA	olf186-F	CG11430	FBtr0086797	FBgn0041585	351	1055	12.5509	11.366	21.4224	12.9612	12.8913	12.7202	0.968344	0.88168	1.68413
CG11436-RA	CG11436	CG11436	FBtr0070699	FBgn0029713	465	1397	5.17	6.97409	2.94145	1.39072	2.29849	1.06204	3.71749	3.03421	2.76963
CG11437-RA	CG11437	CG11437	FBtr0078505	FBgn0037165	305	917	2.62541	0	0.689407	1.81328	0.0910788	0.443513	1.44788	0	1.55442
CG11438-RA	CG11438	CG11438	FBtr0078504	FBgn0037164	341	1025	7.63353	3.16839	16.4985	4.85166	1.29014	5.29276	1.57338	2.45585	3.11719
laza-RA	laza	CG11440	FBtr0078508	FBgn0037163	334	1004	6.59424	7.4646	12.4359	24.911	17.8325	37.2509	0.264712	0.418596	0.333842
CG11444-RA	CG11444	CG11444	FBtr0070698	FBgn0029715	215	647	71.6295	61.0059	67.6645	39.34	44.8547	39.0071	1.82078	1.36008	1.73467
CG11447-RA	CG11447	CG11447	FBtr0083815	FBgn0038737	250	752	12.8058	13.2881	12.3999	4.92992	11.6293	8.22337	2.59757	1.14263	1.50789
Rilpl-RC	Rilpl	CG11448	FBtr0332292	FBgn0024985	486	1460	21.4366	40.7233	12.7736	25.9976	87.2853	28.8931	0.824561	0.466555	0.4421
CG11449-RA	CG11449	CG11449	FBtr0078503	FBgn0037162	538	1616	0	0	0	0	0.0186251	0	#DIV/0!	0	#DIV/0!
net-RB	net	CG11450	FBtr0290323	FBgn0002931	360	1082	3.89383	1.3853	0.584276	2.35545	0.631661	0.638152	1.65312	2.1931	0.915575
Spc105R-RB	Spc105R	CG11451	FBtr0321284	FBgn0037025	1960	5882	0	0.0849423	0.107478	0.264284	0.104742	0.303204	0	0.810964	0.354475
CG11453-RA	CG11453	CG11453	FBtr0083791	FBgn0038734	539	1619	0	0	0.4881	0.594291	0.142551	0.436885	0	0	1.11723
CG11454-RA	CG11454	CG11454	FBtr0078116	FBgn0031224	238	716	15.1309	27.5634	15.4515	12.6126	16.8609	7.76734	1.19966	1.63475	1.98929
ND-15-RA	ND-15	CG11455	FBtr0078117	FBgn0031228	101	305	262.457	547.137	205.72	129.267	361.173	171.571	2.03034	1.51489	1.19904
CG11456-RA	CG11456	CG11456	FBtr0078264	FBgn0037031	445	1337	3.60134	11.2109	1.65494	3.17786	3.53136	1.74445	1.13326	3.17466	0.94869
CG11458-RA	CG11458	CG11458	FBtr0078265	FBgn0040637	98	296	368.038	1246.55	1197.63	63.3129	23.9663	82.1909	5.813	52.0125	14.5713
CG11459-RA	CG11459	CG11459	FBtr0078623	FBgn0037396	336	1010	13.706	1.48405	1.87778	7.89013	0.545301	2.38628	1.73711	2.72153	0.786909
CG1146-RC	CG1146	CG1146	FBtr0072922	FBgn0035346	315	947	5.08447	2.11037	12.8507	19.7425	5.2732	27.7782	0.25754	0.400208	0.462618
Cyp9f2-RA	Cyp9f2	CG11466	FBtr0082598	FBgn0038037	516	1550	168.525	49.1572	541.947	64.2085	14.059	136.44	2.62465	3.49649	3.97206
NPFR-RB	NPFR	CG1147	FBtr0308316	FBgn0037408	466	1400	1.28973	4.10411	0	1.1318	4.00648	0.895943	1.13954	1.02437	0
CG11470-RA	CG11470	CG11470	FBtr0085471	FBgn0039671	230	692	0	0	0	0.0610923	0.0276173	0.0275081	0	0	0
IleRS-RC	IleRS	CG11471	FBtr0078499	FBgn0027086	1229	3689	21.3731	15.914	12.0816	9.16187	8.75382	8.23234	2.33284	1.81795	1.46758
CG11474-RC	CG11474	CG11474	FBtr0303766	FBgn0034688	436	1310	33.5396	35.8514	45.4836	12.6665	12.2095	10.9507	2.64789	2.93636	4.15349
CG11475-RA	CG11475	CG11475	FBtr0071803	FBgn0034687	464	1394	0	0.179208	0.226753	1.42171	2.57721	0.544131	0	0.0695355	0.416724
Osi2-RC	Osi2	CG1148	FBtr0310413	FBgn0037410	390	1172	0.513545	27.7099	0.67426	0.255437	11.3235	3.74521	2.01045	2.44711	0.180033
Mlh1-RA	Mlh1	CG11482	FBtr0088790	FBgn0011659	664	1994	1.50921	1.12755	0.554828	1.07229	0.790121	0.869077	1.40747	1.42706	0.63841
CG11486-RC	CG11486	CG11486	FBtr0072994	FBgn0035397	780	2342	10.7936	10.3468	7.28823	49.2818	72.1575	58.4887	0.219019	0.143391	0.124609
mRpL10-RA	mRpL10	CG11488	FBtr0078124	FBgn0031231	248	746	23.3973	44.2033	17.3724	15.5179	16.7204	10.3979	1.50776	2.64367	1.67077
Srpk79D-RO	Srpk79D	CG11489	FBtr0334750	FBgn0025702	749	2249	1.87333	3.55451	3.72453	10.4293	16.5505	7.04797	0.179623	0.214768	0.528454
MstProx-RA	MstProx	CG1149	FBtr0081585	FBgn0015770	965	2897	0	0	0	0.0408468	0	0	0	#DIV/0!	#DIV/0!
Tbc1d15-17-RA	Tbc1d15-17	CG11490	FBtr0078125	FBgn0031233	715	2147	10.3723	8.02853	11.778	5.27246	4.7012	4.75152	1.96726	1.70776	2.47879
br-RA	br	CG11491	FBtr0070265	FBgn0283451	702	2108	1.14208	3.19972	0	1.06674	1.39541	0.727171	1.07062	2.29303	0
rasp-RA	rasp	CG11495	FBtr0073029	FBgn0024194	500	1502	1.20215	1.16425	0.210448	1.72559	0.77407	1.12962	0.696656	1.50407	0.1863
CG11498-RB	CG11498	CG11498	FBtr0302562	FBgn0039749	531	1595	0.377351	0.156624	0.0990888	1.76345	0.264393	0.841913	0.213984	0.592392	0.117695
Osi3-RA	Osi3	CG1150	FBtr0078594	FBgn0037411	288	866	0	0	0	0	0.0978104	0	#DIV/0!	0	#DIV/0!
Spase12-RA	Spase12	CG11500	FBtr0085435	FBgn0040623	98	296	56.934	122.376	116.933	31.3061	45.4907	44.459	1.81862	2.69013	2.63014
Diedel-RA	Diedel	CG11501	FBtr0085426	FBgn0039666	115	347	143.964	1.43986	0.910932	19.8049	3.30608	8.53298	7.26913	0.435518	0.106754
svp-RC	svp	CG11502	FBtr0082562	FBgn0003651	281	845	26.3543	11.5299	18.7037	10.4472	10.1995	16.7615	2.52261	1.13045	1.11587
CG11504-RA	CG11504	CG11504	FBtr0085548	FBgn0039733	410	1232	4.88534	13.1802	6.02938	7.63368	23.4559	10.613	0.639972	0.561915	0.568112
Larp4B-RB	Larp4B	CG11505	FBtr0073046	FBgn0035424	1531	4595	12.7055	25.7699	11.3849	9.14572	17.1004	10.9425	1.38923	1.50698	1.04043
Osi6-RA	Osi6	CG1151	FBtr0078596	FBgn0027527	312	938	0	0	0.842466	0.215603	0.0259907	0.103552	0	0	8.1357
GstD4-RA	GstD4	CG11512	FBtr0082571	FBgn0010040	215	647	15.8143	4.63336	24.9162	0.153152	0.0553871	0.482721	103.259	83.6542	51.6161
armi-RC	armi	CG11513	FBtr0309840	FBgn0041164	1154	3464	0.521254	1.226	0.638757	1.41279	1.01191	0.98863	0.368954	1.21157	0.646102
Ptp99A-RG	Ptp99A	CG11516	FBtr0303454	FBgn0004369	922	2768	9.78481	17.8697	13.2467	20.8424	33.0402	19.705	0.469467	0.540849	0.67225
pygo-RA	pygo	CG11518	FBtr0085806	FBgn0043900	815	2447	3.68946	6.73797	3.29398	4.09946	8.35944	4.45494	0.899987	0.806031	0.7394
Gld-RA	Gld	CG1152	FBtr0081596	FBgn0001112	612	1838	13.4259	5.16485	10.6626	3.55436	1.37477	1.18652	3.77731	3.75689	8.98639
RpL6-RB	RpL6	CG11522	FBtr0085805	FBgn0039857	262	788	261.22	192.117	193.948	901.717	952.014	1277.08	0.289691	0.2018	0.151869
CG11523-RA	CG11523	CG11523	FBtr0078511	FBgn0037156	158	476	10.1155	16.7943	9.62889	17.7352	50.1486	29.0709	0.570366	0.334891	0.331221
CycG-RF	CycG	CG11525	FBtr0333328	FBgn0039858	566	1700	24.075	61.5722	60.5226	179.802	429.593	360.702	0.133897	0.143327	0.167791
Strip-RC	Strip	CG11526	FBtr0332058	FBgn0035437	882	2648	12.2739	20.5664	14.5632	6.67617	11.8868	9.22396	1.83846	1.73019	1.57885
Tig-RB	Tig	CG11527	FBtr0343152	FBgn0011722	2188	6566	34.2828	2.70132	17.6918	6.08495	1.22161	6.90598	5.63403	2.21129	2.56181
CG11529-RA	CG11529	CG11529	FBtr0076005	FBgn0036264	287	863	9.76389	4.92105	1.09882	3.74296	1.40869	1.68535	2.6086	3.49336	0.651982
Osi7-RA	Osi7	CG1153	FBtr0078597	FBgn0037414	288	866	0.695005	0.576941	0	0.247662	0.00373194	0.00743436	2.80626	154.596	0
Asator-RD	Asator	CG11533	FBtr0300342	FBgn0039908	1349	4049	20.2161	57.1324	2.73234	18.5808	19.1779	10.3597	1.08801	2.97908	0.263747
DEF8-RA	DEF8	CG11534	FBtr0075995	FBgn0046296	492	1478	5.70111	5.40872	6.41597	5.03288	7.52458	7.4765	1.13277	0.718807	0.858151
CG11537-RB	CG11537	CG11537	FBtr0073116	FBgn0035400	680	2042	12.9689	29.7283	14.1638	22.1724	43.427	28.4296	0.584912	0.684558	0.498206
CG11539-RA	CG11539	CG11539	FBtr0085868	FBgn0039859	200	602	5.99875	11.6193	6.82593	3.88699	2.1113	4.01597	1.54329	5.50339	1.6997
Osi12-RA	Osi12	CG1154	FBtr0078602	FBgn0037419	295	887	0.67855	0.563282	0	0.0759216	0.0800824	0.0740682	8.93752	7.03377	0
kermit-RD	kermit	CG11546	FBtr0088813	FBgn0010504	336	1010	4.76732	2.47342	18.3084	8.86347	0.775109	4.60736	0.537862	3.19106	3.97372
Osi14-RA	Osi14	CG1155	FBtr0078606	FBgn0040279	268	806	0	0	0	0.0203548	0	0	0	#DIV/0!	#DIV/0!
CG11550-RA	CG11550	CG11550	FBtr0085867	FBgn0039864	298	896	54.4105	14.777	18.6975	15.4821	1.78049	8.28237	3.51441	8.29944	2.2575
ind-RB	ind	CG11551	FBtr0333875	FBgn0025776	320	962	0	1.81778	0.328579	0.0197221	0.0356622	0	0	50.9723	#DIV/0!
Rpn12R-RA	Rpn12R	CG11552	FBtr0075669	FBgn0036465	262	788	0	0	0.200567	5.85889	0	0.159562	0	#DIV/0!	1.25698
CG11555-RA	CG11555	CG11555	FBtr0078128	FBgn0086856	221	665	11.766	16.5291	17.3495	10.0868	11.9741	7.61386	1.16647	1.38041	2.27867
Rph-RA	Rph	CG11556	FBtr0071502	FBgn0030230	638	1916	1.57065	6.64958	0.494927	3.41828	15.8541	2.75987	0.459486	0.419424	0.17933
CG11560-RA	CG11560	CG11560	FBtr0075993	FBgn0036249	303	911	8.58877	12.8884	7.45994	5.1635	10.1574	6.50267	1.66336	1.26886	1.14721
smo-RA	smo	CG11561	FBtr0078129	FBgn0003444	1036	3110	1.54823	0.321306	0.355732	2.06668	1.23733	1.41955	0.74914	0.259677	0.250595
CG11562-RA	CG11562	CG11562	FBtr0078130	FBgn0031247	125	377	6.38593	11.9275	6.28833	26.3041	17.9573	9.70512	0.242773	0.664216	0.647939
CG11563-RA	CG11563	CG11563	FBtr0085831	FBgn0039868	207	623	17.3896	25.6632	10.4011	10.7428	21.8295	14.9326	1.61873	1.17562	0.696537
CG11566-RA	CG11566	CG11566	FBtr0100609	FBgn0031159	590	1772	0	1.69175	0.0891911	1.53777	2.36303	0.671353	0	0.715926	0.132853
Cpr-RB	Cpr	CG11567	FBtr0079251	FBgn0015623	550	1652	118.043	37.2001	120.831	80.0978	27.9293	60.3476	1.47374	1.33194	2.00225
Osi15-RA	Osi15	CG1157	FBtr0078607	FBgn0037424	214	644	0	0	0	0.0721009	0.00814846	0.0243487	0	0	0
Ir100a-RA	Ir100a	CG11575	FBtr0085846	FBgn0039879	603	1811	0	0	0	0.134811	0.00554024	0	0	0	#DIV/0!
Rift-RA	Rift	CG11576	FBtr0085852	FBgn0039882	487	1463	9.05074	7.00098	16.2044	9.88924	14.5885	12.075	0.915211	0.479897	1.34197
CNPYb-RA	CNPYb	CG11577	FBtr0075034	FBgn0036847	221	665	19.0066	44.3282	18.5378	9.36442	20.5238	20.8944	2.02966	2.15984	0.887212
arm-RA	arm	CG11579	FBtr0089991	FBgn0000117	843	2531	89.8888	210.433	80.9903	38.9691	81.4052	35.3914	2.30667	2.58501	2.28842
Tim17b1-RA	Tim17b1	CG1158	FBtr0078784	FBgn0037310	179	539	0	0	0	2.40459	0.0127884	0.0254757	0	0	0
CG11581-RA	CG11581	CG11581	FBtr0073892	FBgn0030540	334	1004	0	0	0.157417	0.0405238	0	0	0	#DIV/0!	#DIV/0!
srw-RB	srw	CG11582	FBtr0300579	FBgn0261952	136	410	0	0	0	1.27383	0.211143	0.745639	0	0	0
CG11583-RA	CG11583	CG11583	FBtr0073242	FBgn0035524	356	1070	16.3125	10.5063	11.9643	6.68161	8.49261	5.21108	2.4414	1.23711	2.29593
CG11584-RB	CG11584	CG11584	FBtr0073893	FBgn0030541	662	1988	0	0	0	0	0.00456937	0	#DIV/0!	0	#DIV/0!
CG11585-RB	CG11585	CG11585	FBtr0114508	FBgn0030543	342	1028	0.585481	0.243011	0.153742	0.152495	0.00861709	0.00858301	3.83935	28.2011	17.9123
CG11586-RB	CG11586	CG11586	FBtr0333568	FBgn0035520	194	584	14.4285	29.0881	14.6139	18.9637	28.2542	16.1435	0.760849	1.02951	0.905252
CG11588-RA	CG11588	CG11588	FBtr0076038	FBgn0036221	270	812	0	0	0	3.27981	0.0308889	0	0	0	#DIV/0!
VhaM9.7-c-RA	VhaM9.7-c	CG11589	FBtr0073256	FBgn0028664	84	254	18.9567	7.8682	44.1784	16.3672	4.59327	14.4564	1.15821	1.71298	3.05597
CG11590-RA	CG11590	CG11590	FBtr0073899	FBgn0030545	198	596	9.0887	8.80222	12.9938	14.8757	15.0034	15.5193	0.610977	0.586684	0.837264
Dpy-30L2-RA	Dpy-30L2	CG11591	FBtr0073281	FBgn0035491	98	296	0	0	1.06788	53.7007	0.164273	0.872658	0	0	1.22371
Amnionless-RA	Amnionless	CG11592	FBtr0078134	FBgn0025686	505	1517	0.793506	0	0.104184	0.951165	0.256795	0.196296	0.834246	0	0.530747
CG11593-RC	CG11593	CG11593	FBtr0332982	FBgn0035488	484	1454	7.86493	18.7276	2.71745	10.9401	34.4441	10.2432	0.718907	0.543709	0.265293
CG11594-RD	CG11594	CG11594	FBtr0309791	FBgn0035484	548	1646	65.0873	6.37439	9.21779	21.758	7.64004	14.0276	2.99142	0.83434	0.657116
CG11596-RD	CG11596	CG11596	FBtr0332587	FBgn0023522	401	1205	3.99585	3.939	4.19709	8.42833	7.5942	7.49293	0.474097	0.518685	0.56014
CG11597-RA	CG11597	CG11597	FBtr0076080	FBgn0036212	317	953	0.631557	1.31068	0.165841	2.32952	2.70891	0.793588	0.271111	0.48384	0.208976
CG11598-RB	CG11598	CG11598	FBtr0110781	FBgn0038067	388	1166	0	0	0	3.3453	0	0	0	#DIV/0!	#DIV/0!
CG11600-RB	CG11600	CG11600	FBtr0303840	FBgn0038068	406	1220	0	0	0.259093	0.100182	0	0	0	#DIV/0!	#DIV/0!
CG11601-RB	CG11601	CG11601	FBtr0343779	FBgn0031244	275	827	10.1889	12.6871	6.8799	14.5779	17.2069	15.5791	0.69893	0.737328	0.441611
mbm-RA	mbm	CG11604	FBtr0078139	FBgn0086912	539	1619	4.46108	3.39465	2.14764	4.0342	3.08142	3.31978	1.10582	1.10165	0.646921
Rpp30-RA	Rpp30	CG11606	FBtr0078143	FBgn0283652	297	893	4.71794	3.63673	3.18571	4.77644	4.4515	5.76917	0.987752	0.816967	0.552196
H2.0-RA	H2.0	CG11607	FBtr0079227	FBgn0001170	418	1256	0	0	0	0.280595	0.00604026	0.096262	0	0	0
CG11608-RB	CG11608	CG11608	FBtr0303841	FBgn0038069	430	1292	0	0	0	1.03064	0.0436791	0.0435064	0	0	0
CG1161-RA	CG1161	CG1161	FBtr0078785	FBgn0037313	227	683	52.8733	113.752	74.0482	59.9943	94.9712	86.3001	0.881305	1.19775	0.858032
Tim13-RA	Tim13	CG11611	FBtr0076089	FBgn0036204	92	278	0	0	0	6.58173	0	0	0	#DIV/0!	#DIV/0!
nkd-RB	nkd	CG11614	FBtr0332649	FBgn0002945	553	1661	2.89885	3.30881	3.99636	2.14279	2.05117	2.18425	1.35284	1.61314	1.82962
CG11617-RB	CG11617	CG11617	FBtr0308246	FBgn0031232	294	884	1.36171	0	0.178786	2.61665	0.350194	1.39524	0.520401	0	0.12814
CG11619-RA	CG11619	CG11619	FBtr0075046	FBgn0036836	699	2099	0.286743	0	0.376481	1.12917	0.547803	2.40163	0.253941	0	0.156761
Pi3K68D-RB	Pi3K68D	CG11621	FBtr0076086	FBgn0015278	366	1100	6.5659	9.3113	11.3506	4.2406	5.55878	3.79225	1.54834	1.67506	2.99311
Rlip-RA	Rlip	CG11622	FBtr0084002	FBgn0026056	625	1877	8.97841	34.8703	5.55731	10.6714	23.6899	6.19093	0.841354	1.47195	0.897653
Ubi-p63E-RD	Ubi-p63E	CG11624	FBtr0333142	FBgn0003943	763	2291	2303.73	3117.95	2934.38	150.846	227.012	170.349	15.2721	13.7348	17.2258
CG11626-RB	CG11626	CG11626	FBtr0113247	FBgn0038705	379	1139	0	0	0	0.318118	0.0884972	0.0661105	0	0	0
step-RE	step	CG11628	FBtr0332471	FBgn0086779	727	2183	4.96277	5.37853	9.19465	6.03069	4.23753	6.68708	0.82292	1.26926	1.37499
CG11629-RA	CG11629	CG11629	FBtr0085950	FBgn0032965	463	1391	0	0	0	0.369206	0	0	0	#DIV/0!	#DIV/0!
RpII18-RA	RpII18	CG1163	FBtr0078787	FBgn0003275	131	395	33.5221	60.0822	42.4125	52.5827	73.9465	46.0223	0.637512	0.812509	0.921565
CG11630-RA	CG11630	CG11630	FBtr0085909	FBgn0032964	631	1895	0	0	0	0.362789	0	0.0198004	0	#DIV/0!	0
CG11634-RA	CG11634	CG11634	FBtr0085930	FBgn0032968	298	896	0	0	0.176391	2.58536	0	0.0781867	0	#DIV/0!	2.25603
CG11635-RA	CG11635	CG11635	FBtr0088739	FBgn0033283	286	860	0	0	0	10.8779	0.0858944	0.352913	0	0	0
NijB-RA	NijB	CG11637	FBtr0075065	FBgn0036822	181	545	0	0	0	0.209783	0.0541911	0.0944595	0	0	0
CG11638-RA	CG11638	CG11638	FBtr0070183	FBgn0040351	387	1163	12.4204	70.6701	1.90254	5.44804	28.1799	3.54156	2.2798	2.50782	0.537204
TfIIA-S-2-RA	TfIIA-S-2	CG11639	FBtr0070184	FBgn0040338	107	323	0	0	0	0.576807	0.108646	0.19479	0	0	0
TRAM-RD	TRAM	CG11642	FBtr0307182	FBgn0040340	368	1106	35.3724	13.5524	24.8645	13.669	6.89054	11.5333	2.58777	1.96681	2.15589
Abd-B-RG	Abd-B	CG11648	FBtr0346764	FBgn0000015	286	860	0	0	0.183775	0.709015	0	0.0157654	0	#DIV/0!	11.6569
LysS-RA	LysS	CG1165	FBtr0072631	FBgn0004430	140	422	0	5.32782	3.74518	0.180545	0.244851	1.52427	0	21.7594	2.45703
Lcp1-RA	Lcp1	CG11650	FBtr0088763	FBgn0002531	130	392	4.60618	0.637284	1.61272	0.204485	0	0.405125	22.5258	#DIV/0!	3.9808
Dph1-RA	Dph1	CG11652	FBtr0076130	FBgn0036194	454	1364	10.5902	54.2121	23.5216	4.2998	10.4114	9.22246	2.46294	5.20702	2.55047
Ahcy-RB	Ahcy	CG11654	FBtr0332590	FBgn0014455	323	971	42.7696	22.1258	25.3916	34.3444	24.7584	36.5003	1.24532	0.893669	0.695655
CG11655-RA	CG11655	CG11655	FBtr0074031	FBgn0030638	455	1367	16.2907	6.94439	35.9565	5.65505	2.24708	12.4525	2.88073	3.09041	2.88749
CG11656-RA	CG11656	CG11656	FBtr0082698	FBgn0038109	291	875	0	0	0	4.54916	0.027059	0.00898402	0	0	0
CG11658-RC	CG11658	CG11658	FBtr0076126	FBgn0036196	351	1055	14.2624	28.415	13.0332	11.3245	27.4376	15.6952	1.25943	1.03562	0.830395
CG11659-RA	CG11659	CG11659	FBtr0083797	FBgn0038731	546	1640	0	0	0.19274	0.247469	0	0	0	#DIV/0!	#DIV/0!
RIOK1-RA	RIOK1	CG11660	FBtr0076134	FBgn0036187	585	1757	4.45325	2.84366	3.95791	2.04838	2.40071	3.05979	2.17403	1.18451	1.29352
Nc73EF-RA	Nc73EF	CG11661	FBtr0075266	FBgn0010352	1008	3026	152.557	203.419	118.195	68.0811	53.5424	44.6415	2.24081	3.79921	2.64766
CG11663-RA	CG11663	CG11663	FBtr0070164	FBgn0029539	152	458	1.31414	1.0909	0.69016	6.55003	0	0.141945	0.20063	#DIV/0!	4.86218
CG11664-RA	CG11664	CG11664	FBtr0070163	FBgn0040341	254	764	0	0	0	1.33595	0	0	0	#DIV/0!	#DIV/0!
hrm-RA	hrm	CG11665	FBtr0086072	FBgn0033028	658	1976	22.8444	19.2166	77.7436	13.8552	22.4247	24.9847	1.6488	0.856939	3.11164
CG11666-RA	CG11666	CG11666	FBtr0077240	FBgn0040648	96	290	0	0	0.544988	3.99806	0	0	0	#DIV/0!	#DIV/0!
CG11668-RA	CG11668	CG11668	FBtr0082705	FBgn0038113	398	1196	5.53563	1.87988	2.11434	6.23905	1.04929	3.15023	0.887256	1.79158	0.671168
Mal-A7-RA	Mal-A7	CG11669	FBtr0088757	FBgn0033296	599	1799	0.669121	3.19386	7.2039	2.08804	0.0521502	0.109082	0.320454	61.2435	66.041
Ras64B-RA	Ras64B	CG1167	FBtr0073212	FBgn0003206	192	578	21.8674	24.2036	18.3203	25.5107	25.5186	26.5226	0.857185	0.948466	0.690742
CG11670-RD	CG11670	CG11670	FBtr0300071	FBgn0038114	404	1214	0	0	0.260373	0.0332192	0	0	0	#DIV/0!	#DIV/0!
Nazo-RA	Nazo	CG11671	FBtr0081829	FBgn0037562	140	422	11.4099	10.6556	19.1004	15.0004	2.38811	14.9915	0.760644	4.46195	1.27409
CG11672-RA	CG11672	CG11672	FBtr0081865	FBgn0037563	240	722	0	0.346005	0	2.19696	0.026842	0.115855	0	12.8904	0
CG11674-RA	CG11674	CG11674	FBtr0073926	FBgn0030551	344	1034	0	0.724803	0.305699	5.81704	0.453978	1.25417	0	1.59656	0.243747
Arp6-RA	Arp6	CG11678	FBtr0074203	FBgn0011741	398	1196	3.52268	6.68402	4.49296	9.41369	13.3107	13.3546	0.374208	0.502155	0.336437
CG11679-RA	CG11679	CG11679	FBtr0074202	FBgn0030678	420	1262	3.33845	4.75085	5.25987	3.69105	3.79721	6.09391	0.90447	1.25114	0.863136
7B2-RA	7B2	CG1168	FBtr0078789	FBgn0041707	271	815	420.204	2231.17	55.6557	139.632	391.907	72.1214	3.00937	5.69312	0.771694
mle-RC	mle	CG11680	FBtr0100576	FBgn0002774	936	2810	10.9237	16.8914	6.18688	10.7309	16.0927	9.86997	1.01796	1.04963	0.626839
CG11686-RA	CG11686	CG11686	FBtr0082735	FBgn0040551	70	212	88.0099	23.5675	176.684	31.4821	8.50552	41.4049	2.79555	2.77085	4.26723
Osi18-RA	Osi18	CG1169	FBtr0078611	FBgn0037428	306	920	0	0	0	0.0174859	0	0	0	#DIV/0!	#DIV/0!
CG11693-RB	CG11693	CG11693	FBtr0306794	FBgn0037570	323	971	0	0.257276	1.4649	0.0618151	0.013972	0.0974175	0	18.4137	15.0374
CG11694-RA	CG11694	CG11694	FBtr0081859	FBgn0037571	261	785	0	0	0	1.59131	0	0.032083	0	#DIV/0!	0
CG11695-RA	CG11695	CG11695	FBtr0073513	FBgn0030316	544	1634	1.84172	2.90483	2.22465	5.45616	13.1566	9.62037	0.337549	0.220789	0.231243
CG11696-RA	CG11696	CG11696	FBtr0073512	FBgn0030314	664	1994	2.71658	4.51021	1.98153	2.82184	4.68931	1.99537	0.9627	0.961806	0.993063
Reepl1-RA	Reepl1	CG11697	FBtr0073511	FBgn0030313	240	722	0	0	0	5.25456	0	0.12847	0	#DIV/0!	0
CG11698-RA	CG11698	CG11698	FBtr0081833	FBgn0037572	262	788	0	0	0	0.610084	0	0.164822	0	#DIV/0!	0
CG11699-RA	CG11699	CG11699	FBtr0073510	FBgn0030311	146	440	23.2542	31.7947	31.2501	43.5467	48.5946	56.933	0.534007	0.654285	0.548893
CG11700-RB	CG11700	CG11700	FBtr0333520	FBgn0029856	301	905	1008.22	1523.46	875.456	0.815237	0.162156	0.278979	1236.72	9395.05	3138.07
CG11703-RA	CG11703	CG11703	FBtr0083744	FBgn0038690	353	1061	0.567271	0.235453	0	1.59863	0	0	0.354848	#DIV/0!	#DIV/0!
PGRP-SA-RB	PGRP-SA	CG11709	FBtr0340296	FBgn0030310	203	611	26.5967	7.7684	13.4508	16.7318	8.42107	28.0281	1.58959	0.922496	0.479903
Akh-RA	Akh	CG1171	FBtr0073213	FBgn0004552	79	239	0	50.1721	0	4.88887	1.98531	0.317139	0	25.2717	0
CG11710-RB	CG11710	CG11710	FBtr0089642	FBgn0031115	513	1541	8.59262	16.2113	13.5381	3.76983	5.78972	5.75559	2.27931	2.80001	2.35216
Mob2-RB	Mob2	CG11711	FBtr0089333	FBgn0259481	537	1613	42.9111	92.4611	35.0779	58.9903	182.942	68.2	0.727425	0.505412	0.514339
CG11714-RA	CG11714	CG11714	FBtr0076156	FBgn0036170	383	1151	0	0	0	4.52217	0.0608419	0.181804	0	0	0
Cyp4g15-RA	Cyp4g15	CG11715	FBtr0073503	FBgn0030304	574	1724	70.1721	12.0271	771.348	32.3487	5.42221	210.259	2.16924	2.21811	3.66856
Mst98Ca-RA	Mst98Ca	CG11719	FBtr0085277	FBgn0002865	334	1004	0	0	0.944502	47.1921	0.106554	0.818738	0	0	1.15361
CG1172-RA	CG1172	CG1172	FBtr0078792	FBgn0264712	249	749	4.82142	8.3383	7.17435	8.15837	9.37694	9.51338	0.590979	0.889234	0.754132
Sgs3-RA	Sgs3	CG11720	FBtr0076096	FBgn0003373	307	923	0	0	0	0	0	0.0180328	#DIV/0!	#DIV/0!	0
CG11722-RA	CG11722	CG11722	FBtr0082205	FBgn0037777	203	611	15.761	52.7434	8.2774	14.8239	17.7962	8.22013	1.06321	2.96374	1.00697
CG11723-RA	CG11723	CG11723	FBtr0077852	FBgn0031391	350	1052	12.0146	15.1979	7.06102	5.84123	10.48	6.06279	2.05686	1.45018	1.16465
CG11726-RA	CG11726	CG11726	FBtr0076172	FBgn0036156	291	875	0	0	0	2.32452	0.0510107	0.0406472	0	0	0
Evi5-RA	Evi5	CG11727	FBtr0073547	FBgn0262740	807	2423	9.19082	31.1367	4.04411	6.95841	32.8581	8.72067	1.32082	0.94761	0.463739
HERC2-RC	HERC2	CG11734	FBtr0301344	FBgn0031107	4912	14738	1.06179	4.40711	0.77211	2.34948	3.73755	1.41975	0.451927	1.17915	0.543834
Or85b-RA	Or85b	CG11735	FBtr0081900	FBgn0037590	390	1172	0	0	0	0.0189319	0.0770249	0	0	0	#DIV/0!
CG11737-RC	CG11737	CG11737	FBtr0310048	FBgn0037592	455	1367	17.6115	8.22362	12.1396	17.1781	12.6487	18.5601	1.02523	0.650157	0.654074
l(1)G0004-RA	l(1)G0004	CG11738	FBtr0077298	FBgn0027334	240	722	29.1767	14.5322	18.3877	11.6035	14.2227	16.5851	2.51448	1.02176	1.10869
Sfxn1-3-RD	Sfxn1-3	CG11739	FBtr0078915	FBgn0037239	321	965	109.148	49.1865	21.1275	55.5177	43.1521	46.3297	1.96601	1.13984	0.456025
CG11741-RB	CG11741	CG11741	FBtr0339331	FBgn0040531	67	203	8.89469	4.92247	0	14.9711	2.17134	1.32012	0.594126	2.26702	0
Or85d-RA	Or85d	CG11742	FBtr0081872	FBgn0037594	412	1238	0	0	0	0	0	0	#DIV/0!	#DIV/0!	#DIV/0!
Obp19a-RC	Obp19a	CG11748	FBtr0307166	FBgn0031109	146	440	1.3679	0	0.359197	1.20878	0.0624504	0.777544	1.13163	0	0.461964
Pa1-RA	Pa1	CG11750	FBtr0073456	FBgn0030294	122	368	17.9908	25.7962	5.58317	10.708	29.4631	10.1589	1.68014	0.875542	0.549584
CG11752-RA	CG11752	CG11752	FBtr0073452	FBgn0030292	109	329	150.011	364.472	113.851	131.054	322.992	121.793	1.14465	1.12843	0.93479
CG11753-RA	CG11753	CG11753	FBtr0081879	FBgn0037603	160	482	24.974	27.4693	32.7898	25.8924	25.406	58.0212	0.964533	1.08121	0.565134
CG11755-RA	CG11755	CG11755	FBtr0081903	FBgn0037611	154	464	2.59429	4.84556	2.72494	7.51161	8.2361	4.88276	0.34537	0.588332	0.558074
CG11756-RA	CG11756	CG11756	FBtr0073450	FBgn0030290	203	611	0	0	0	2.35169	0.013457	0.201057	0	0	0
Kap3-RF	Kap3	CG11759	FBtr0289954	FBgn0028421	945	2837	12.3048	34.6061	4.56814	7.99842	23.3813	5.91232	1.5384	1.48007	0.772648
Obp84a-RA	Obp84a	CG1176	FBtr0081597	FBgn0011282	175	527	0	0	0.599797	0.234464	0.0151416	0.0301635	0	0	19.8849
CG11760-RB	CG11760	CG11760	FBtr0081907	FBgn0037615	149	449	0	1.66915	0	16.8881	25.5866	12.3994	0	0.0652352	0
trsn-RA	trsn	CG11761	FBtr0088306	FBgn0033528	235	707	22.134	43.4615	19.8955	7.65938	7.95909	5.33523	2.88979	5.46062	3.72909
ouib-RA	ouib	CG11762	FBtr0081912	FBgn0037618	312	938	0	0	0	0.116777	0	0	0	#DIV/0!	#DIV/0!
Prx2540-2-RA	Prx2540-2	CG11765	FBtr0088259	FBgn0033518	220	662	95.4634	30.9439	106.24	22.2071	0.996854	8.65586	4.29879	31.0416	12.2737
Or24a-RB	Or24a	CG11767	FBtr0289965	FBgn0026394	398	1196	0	0.208876	0	0	0.00838672	0	#DIV/0!	24.9055	#DIV/0!
CG11768-RA	CG11768	CG11768	FBtr0081943	FBgn0037625	494	1484	2.02788	6.56523	0.532502	3.34118	3.00175	0.999161	0.606934	2.18713	0.532949
lin-RA	lin	CG11770	FBtr0088651	FBgn0002552	858	2576	1.63553	1.55165	3.06768	3.16028	3.82434	5.07349	0.517526	0.405729	0.604648
CG11771-RA	CG11771	CG11771	FBtr0084748	FBgn0039252	730	2192	10.9831	20.8559	8.58009	6.6162	8.21973	4.98033	1.66003	2.5373	1.72279
Ir85a-RA	Ir85a	CG11775	FBtr0081917	FBgn0037630	605	1817	0.331246	0.549951	0.0869822	0.218022	0.0703991	0.0420724	1.51933	7.81191	2.06744
CG11777-RA	CG11777	CG11777	FBtr0088273	FBgn0033527	161	485	3.72293	11.8469	9.77608	7.1278	11.2705	6.33331	0.522312	1.05114	1.5436
CNT1-RB	CNT1	CG11778	FBtr0300173	FBgn0033371	590	1772	0	0	0.0891911	2.35541	0.00356116	0.0141883	0	0	6.28624
CG11779-RE	CG11779	CG11779	FBtr0335020	FBgn0038683	428	1286	17.7848	22.7282	7.61967	9.4968	9.86036	6.68904	1.87271	2.305	1.13913
ﾎｲ4GalT7-RA	ﾎｲ4GalT7	CG11780	FBtr0084755	FBgn0039258	322	968	3.10885	4.64533	3.26543	4.78897	4.6495	4.7221	0.64917	0.999102	0.691519
CG11781-RA	CG11781	CG11781	FBtr0084797	FBgn0039259	113	341	51.1858	86.4464	65.8141	26.1126	22.0897	20.9595	1.96019	3.91343	3.14006
Hr96-RA	Hr96	CG11783	FBtr0084756	FBgn0015240	723	2171	4.1585	7.24937	5.96952	6.80944	16.0644	8.08687	0.610697	0.45127	0.738174
GstE13-RA	GstE13	CG11784	FBtr0088579	FBgn0033381	226	680	10.6213	31.9617	31.6093	9.32594	22.442	11.6348	1.1389	1.42419	2.71679
bai-RA	bai	CG11785	FBtr0084758	FBgn0045866	206	620	93.1934	105.164	100.691	66.9514	47.2214	70.5273	1.39196	2.22705	1.42769
CG11786-RB	CG11786	CG11786	FBtr0113282	FBgn0039264	222	668	0	0	0	0.115662	0.0130715	0.0260396	0	0	0
CG11788-RA	CG11788	CG11788	FBtr0086277	FBgn0034495	425	1277	0.471319	1.17376	0.866348	1.46079	4.39773	1.3085	0.322647	0.266902	0.66209
LysB-RA	LysB	CG1179	FBtr0072628	FBgn0004425	140	422	0	17.7594	4.1197	7.12819	0.0206562	0.041149	0	859.761	100.117
CG11790-RA	CG11790	CG11790	FBtr0084760	FBgn0039265	302	908	33.8057	29.4386	75.5421	24.9775	13.0108	33.2251	1.35345	2.26262	2.27365
CG11791-RC	CG11791	CG11791	FBtr0113283	FBgn0039266	131	395	27.4272	12.6489	43.2127	45.8527	33.5627	82.9421	0.598158	0.376873	0.520999
Sod1-RA	Sod1	CG11793	FBtr0076229	FBgn0003462	153	461	774.211	916.893	1027.13	411.631	465.054	561.153	1.88084	1.97158	1.83039
Hpd-RA	Hpd	CG11796	FBtr0078225	FBgn0036992	380	1142	44.798	54.9069	64.7687	53.6657	36.6679	83.6137	0.834761	1.49741	0.774618
Obp56a-RA	Obp56a	CG11797	FBtr0086476	FBgn0034468	139	419	18.6739	26.8298	33.948	4.70936	3.37689	9.01209	3.96527	7.94513	3.76694
chn-RA	chn	CG11798	FBtr0087415	FBgn0015371	1108	3326	4.16209	21.4063	1.71067	15.7423	50.3804	10.7708	0.264389	0.424894	0.158825
FoxK-RI	FoxK	CG11799	FBtr0300785	FBgn0036134	746	2240	14.7782	41.8218	13.053	11.1141	20.046	10.2968	1.32968	2.08629	1.26768
LysE-RA	LysE	CG1180	FBtr0072630	FBgn0004428	140	422	0	8.28772	2.99614	12.3287	0.0692338	0.18964	0	119.706	15.7991
Elo68ﾎｲ-RB	Elo68ﾎｲ	CG11801	FBtr0113161	FBgn0036128	269	809	0	0	0	0.0793109	0	0	0	#DIV/0!	#DIV/0!
BORCS5-RA	BORCS5	CG11802	FBtr0073600	FBgn0030346	349	1049	6.31136	14.5269	2.86262	7.42235	28.7	7.69014	0.850319	0.506164	0.372245
ced-6-RC	ced-6	CG11804	FBtr0088549	FBgn0029092	517	1553	112.391	20.2683	208.015	55.2274	18.8546	109.225	2.03506	1.07498	1.90447
CG11807-RA	CG11807	CG11807	FBtr0087363	FBgn0033996	491	1475	3.67245	6.43592	9.32207	10.5726	13.1874	9.10982	0.347355	0.488037	1.0233
CG11808-RA	CG11808	CG11808	FBtr0087366	FBgn0034000	219	659	4.56657	7.20257	4.55673	4.76856	11.2922	5.05578	0.957642	0.637836	0.901291
CG11811-RA	CG11811	CG11811	FBtr0076265	FBgn0036099	233	701	12.0203	32.0733	4.96009	12.5065	19.791	9.84684	0.961129	1.6206	0.503724
CG11815-RA	CG11815	CG11815	FBtr0072852	FBgn0035299	283	851	0	0	0	2.46257	0.019879	0.00990021	0	0	0
CG11816-RC	CG11816	CG11816	FBtr0332297	FBgn0030495	346	1040	0	0.240207	0.151968	0.036848	0.0388674	0.0165916	0	6.18016	9.15932
PQBP1-RA	PQBP1	CG11820	FBtr0084765	FBgn0039270	231	695	4.33003	14.7373	5.91254	10.0034	23.1427	11.6696	0.432855	0.636802	0.506662
Cyp12a5-RA	Cyp12a5	CG11821	FBtr0083730	FBgn0038680	536	1610	18.6917	0.620659	10.4056	5.60057	0.270278	2.84044	3.33747	2.29637	3.66337
nAChRﾎｲ3-RA	nAChRﾎｲ3	CG11822	FBtr0078064	FBgn0031261	441	1325	42.2448	1.13124	2.98201	9.19013	1.95929	6.37026	4.59675	0.577372	0.468115
CG11825-RA	CG11825	CG11825	FBtr0088316	FBgn0033519	100	302	3.98592	4.13602	12.56	5.05044	0.604349	4.68191	0.789223	6.84376	2.68267
CG11828-RD	CG11828	CG11828	FBtr0308601	FBgn0039616	458	1376	0	0.181552	0.229719	1.11321	0.0967761	0.0578361	0	1.876	3.9719
Ssl2-RB	Ssl2	CG11833	FBtr0345060	FBgn0041780	414	1244	0	0	0.127047	0.0877172	0.211485	0.0394966	0	0	3.21666
CG11835-RB	CG11835	CG11835	FBtr0332341	FBgn0031264	795	2387	2.01717	0.94191	0.198634	2.30069	1.20034	0.987668	0.876767	0.7847	0.201114
CG11836-RE	CG11836	CG11836	FBtr0302404	FBgn0039272	223	671	0.896981	1.48921	1.41323	2.60046	0.867675	1.07798	0.344932	1.71633	1.311
CG11837-RA	CG11837	CG11837	FBtr0085360	FBgn0039627	306	920	14.3926	11.1331	7.38696	4.6508	2.62122	3.19104	3.09466	4.24729	2.3149
rempA-RB	rempA	CG11838	FBtr0078078	FBgn0260933	1503	4511	0.133424	0.387654	0.210215	0.481801	0.381654	0.330388	0.276927	1.01572	0.636267
CG11839-RB	CG11839	CG11839	FBtr0304718	FBgn0039271	254	764	2.36338	3.26984	3.72361	5.25957	4.62318	3.81549	0.449349	0.70727	0.97592
Spp-RA	Spp	CG11840	FBtr0078080	FBgn0031260	389	1169	36.5552	25.0029	29.7436	17.474	12.6816	16.5713	2.09198	1.97158	1.79489
CG11841-RA	CG11841	CG11841	FBtr0085361	FBgn0039628	319	959	85.3544	31.52	35.4328	30.9372	15.6835	45.5354	2.75896	2.00976	0.778136
CG11842-RA	CG11842	CG11842	FBtr0085362	FBgn0039629	319	959	6.90367	3.64694	5.60332	7.6672	9.07812	23.1735	0.900416	0.401729	0.241799
CG11843-RA	CG11843	CG11843	FBtr0085363	FBgn0039630	316	950	0.633552	0.525927	1.83001	0.423799	0.450218	1.02091	1.49493	1.16816	1.79253
vig2-RA	vig2	CG11844	FBtr0084777	FBgn0046214	412	1238	67.5772	84.9534	58.4696	37.0166	48.516	46.4457	1.82559	1.75104	1.25888
Clbn-RC	Clbn	CG11847	FBtr0301278	FBgn0259152	992	2978	11.7222	10.8214	5.67864	5.83464	11.5487	8.94343	2.00907	0.937021	0.634951
Bili-RD	Bili	CG11848	FBtr0302169	FBgn0039282	828	2486	2.17895	10.7523	0.254299	3.3814	7.59477	2.86377	0.644393	1.41575	0.0887984
dan-RB	dan	CG11849	FBtr0330288	FBgn0039286	781	2345	0.513326	6.39187	0.134795	0.79121	3.09884	0.419129	0.648786	2.06267	0.321607
Alg9-RA	Alg9	CG11851	FBtr0084808	FBgn0039293	623	1871	8.04215	8.67878	4.22359	3.9095	2.34085	2.05655	2.05708	3.70753	2.05373
CG11852-RA	CG11852	CG11852	FBtr0084809	FBgn0039297	250	752	16.8077	1.99321	1.89152	4.0164	0.249772	1.10996	4.18476	7.98012	1.70413
to-RA	to	CG11853	FBtr0084810	FBgn0039298	249	749	63.4821	62.0369	45.7892	20.5383	4.89372	13.1493	3.09091	12.6768	3.48227
CG11854-RB	CG11854	CG11854	FBtr0339259	FBgn0039299	250	752	0	0.332201	0.210168	0.363349	0.0386483	0.269469	0	8.59549	0.779936
Nup358-RB	Nup358	CG11856	FBtr0304692	FBgn0039302	2718	8156	8.56025	9.31141	5.65836	4.18541	5.17145	4.30809	2.04526	1.80054	1.31343
CG11857-RA	CG11857	CG11857	FBtr0084814	FBgn0039303	203	611	89.6408	97.3094	97.0008	25.5856	27.2684	26.4499	3.50357	3.56858	3.66734
CG11858-RA	CG11858	CG11858	FBtr0084815	FBgn0039305	130	392	15.3539	39.5116	17.7399	21.8017	31.6439	19.897	0.704255	1.24863	0.891587
RIOK2-RA	RIOK2	CG11859	FBtr0084816	FBgn0039306	538	1616	16.3877	15.4589	10.3669	8.37045	10.36	8.07475	1.9578	1.49217	1.28387
Semp1-RA	Semp1	CG11864	FBtr0080784	FBgn0028944	251	755	0	0	0	1.91392	0	0	0	#DIV/0!	#DIV/0!
CG11865-RA	CG11865	CG11865	FBtr0080753	FBgn0028947	240	722	0	0	0	0	0	0	#DIV/0!	#DIV/0!	#DIV/0!
dmpd-RA	dmpd	CG11866	FBtr0088423	FBgn0033486	603	1811	11.632	17.9326	5.41076	8.18673	7.52716	5.51125	1.42084	2.38239	0.981767
CG11873-RC	CG11873	CG11873	FBtr0330300	FBgn0039633	2684	8054	1.12095	4.43551	1.74648	4.28704	7.27672	3.03546	0.261474	0.609548	0.575359
ﾎｱ-Man-Ib-RA	ﾎｱ-Man-Ib	CG11874	FBtr0085416	FBgn0039634	685	2057	10.8261	22.3462	4.53318	10.6851	22.926	9.60373	1.0132	0.974709	0.472023
Nup37-RA	Nup37	CG11875	FBtr0084812	FBgn0039301	320	962	5.63084	6.2324	3.45008	2.34709	2.55734	2.20398	2.39907	2.43707	1.56539
Pdhb-RD	Pdhb	CG11876	FBtr0085369	FBgn0039635	365	1097	132.226	212.013	91.7737	89.1808	118.518	86.7103	1.48267	1.78886	1.05839
Atg14-RA	Atg14	CG11877	FBtr0085370	FBgn0039636	503	1511	4.77994	8.59722	5.12527	8.16401	25.8612	13.0858	0.585489	0.332437	0.391667
CG11878-RA	CG11878	CG11878	FBtr0084821	FBgn0039310	420	1262	0	4.15699	3.00564	6.68689	0.0821026	0.512971	0	50.6317	5.85928
Ctl2-RC	Ctl2	CG11880	FBtr0085373	FBgn0039637	796	2390	15.6135	15.5743	38.3544	9.22836	4.64164	14.6605	1.6919	3.35533	2.61618
dgt6-RA	dgt6	CG11881	FBtr0085414	FBgn0039638	654	1964	0.91936	2.79834	1.93132	0.68765	0.603431	0.596492	1.33696	4.63738	3.2378
CG11882-RB	CG11882	CG11882	FBtr0335407	FBgn0039642	263	791	4.56542	7.57973	4.99515	4.86461	3.70789	4.89156	0.938496	2.04422	1.02118
CG11883-RD	CG11883	CG11883	FBtr0339461	FBgn0033538	792	2378	10.124	34.0371	11.4979	5.87247	12.8534	5.82239	1.72398	2.6481	1.97478
CG11885-RA	CG11885	CG11885	FBtr0078089	FBgn0031253	141	425	14.1617	22.3364	11.9	14.2589	13.3972	10.3229	0.99319	1.66724	1.15277
Slbp-RA	Slbp	CG11886	FBtr0085409	FBgn0041186	276	830	11.6024	18.6609	8.18796	11.4566	12.8324	8.36506	1.01272	1.4542	0.978828
Elp2-RA	Elp2	CG11887	FBtr0088212	FBgn0033540	794	2384	7.06899	8.38307	4.9721	2.95744	3.46496	3.40005	2.39024	2.41938	1.46236
Rpn2-RB	Rpn2	CG11888	FBtr0330379	FBgn0028692	1029	3089	37.9947	25.394	24.3031	18.3801	29.3589	30.3585	2.06716	0.864951	0.800535
CG11889-RA	CG11889	CG11889	FBtr0100614	FBgn0039308	417	1253	7.68554	3.7881	71.3922	7.18109	1.49697	19.224	1.07025	2.53051	3.71369
CG11892-RB	CG11892	CG11892	FBtr0089644	FBgn0039313	439	1319	5.47573	11.3639	35.9469	6.44152	0.0598345	3.59574	0.850068	189.921	9.99708
CG11893-RA	CG11893	CG11893	FBtr0084827	FBgn0039316	416	1250	47.6684	0.799409	1.0115	15.8667	0.227028	0.452261	3.00431	3.52119	2.23654
stan-RA	stan	CG11895	FBtr0088214	FBgn0024836	3579	10739	0.89673	3.72199	0.559249	1.04016	1.93169	0.695412	0.862108	1.92681	0.804198
m-cup-RB	m-cup	CG11896	FBtr0337043	FBgn0038488	701	2105	5.71852	9.8502	2.77802	6.01331	6.81713	4.13269	0.950976	1.44492	0.672205
rdog-RA	rdog	CG11897	FBtr0085386	FBgn0039644	1374	4124	4.08644	3.33168	10.0408	4.3686	3.18859	6.27	0.935411	1.04488	1.6014
CG11898-RB	CG11898	CG11898	FBtr0273260	FBgn0039645	1320	3962	0	0.0630529	0.0797812	0.074487	0.00673451	0.0223596	0	9.36265	3.5681
CG11899-RA	CG11899	CG11899	FBtr0085390	FBgn0014427	364	1094	86.375	24.6619	54.6084	24.8319	12.7108	43.8146	3.47839	1.94022	1.24635
Mesh1-RA	Mesh1	CG11900	FBtr0085407	FBgn0039650	179	539	6.6999	6.02523	6.15766	4.08167	6.72388	4.85943	1.64146	0.896095	1.26716
eEF1ﾎｳ-RA	eEF1ﾎｳ	CG11901	FBtr0085393	FBgn0029176	431	1295	99.9251	46.8766	62.2423	342.579	280.824	466.985	0.291684	0.166925	0.133285
CG11902-RB	CG11902	CG11902	FBtr0300735	FBgn0028647	1426	4280	1.54687	2.80167	0.738536	2.00303	2.68591	1.49738	0.772267	1.0431	0.493218
CG11905-RB	CG11905	CG11905	FBtr0075300	FBgn0036678	403	1211	0	0	0.130509	0.148941	0.013466	0.0201191	0	0	6.48682
CG11906-RA	CG11906	CG11906	FBtr0086563	FBgn0034425	634	1904	1.58055	3.14893	1.90918	3.34707	6.35052	3.88785	0.47222	0.495855	0.491062
Ent1-RC	Ent1	CG11907	FBtr0330651	FBgn0031250	476	1430	23.9908	9.43359	12.8206	13.9654	5.13802	10.944	1.71788	1.83604	1.17147
rha-RA	rha	CG11908	FBtr0084832	FBgn0027376	1332	3998	0	0.0624851	0.0790628	1.57956	0.107693	0.111931	0	0.580212	0.70635
tobi-RA	tobi	CG11909	FBtr0084847	FBgn0261575	657	1973	10.982	4.05175	6.40838	8.05323	1.19284	1.05505	1.36368	3.39673	6.074
alrm-RA	alrm	CG11910	FBtr0084846	FBgn0039332	471	1415	18.7155	5.11989	125.209	30.3423	6.65363	167.168	0.616812	0.769489	0.748999
CG11911-RA	CG11911	CG11911	FBtr0078098	FBgn0031249	277	833	0.722538	6.29787	4.36383	35.0047	0.0206988	0.257712	0.0206411	304.263	16.933
CG11912-RA	CG11912	CG11912	FBtr0078099	FBgn0031248	271	815	0	3.06522	1.16353	7.07263	0.0111792	0.02227	0	274.19	52.2468
ND-49L-RB	ND-49L	CG11913	FBtr0273265	FBgn0039331	523	1571	0	0	0	2.31215	0.0177157	0.0823465	0	0	0
Pex6-RD	Pex6	CG11919	FBtr0339472	FBgn0033564	899	2699	6.02097	4.9056	5.15306	4.89815	6.95248	4.85423	1.22923	0.705591	1.06156
CG11920-RA	CG11920	CG11920	FBtr0084769	FBgn0039274	298	896	11.4195	10.8737	8.64317	6.58312	4.1465	5.66161	1.73466	2.62237	1.52663
fd96Ca-RA	fd96Ca	CG11921	FBtr0084770	FBgn0004897	372	1118	0	0	0	0.0652381	0.194644	0.0293749	0	0	0
fd96Cb-RA	fd96Cb	CG11922	FBtr0084771	FBgn0004898	271	815	0	0.919566	0	0.346985	0.424439	0.0919045	0	2.16654	0
Cf2-RF	Cf2	CG11924	FBtr0336835	FBgn0000286	431	1295	11.1544	12.3461	14.1571	12.5877	13.5649	12.952	0.886135	0.910151	1.09304
Mon1-RA	Mon1	CG11926	FBtr0077387	FBgn0031640	528	1586	7.21035	6.93057	6.37767	5.92346	7.75055	7.82616	1.21725	0.894204	0.814916
CG11927-RA	CG11927	CG11927	FBtr0077386	FBgn0031638	489	1469	6.55547	12.0741	6.88563	5.63501	8.33681	4.17499	1.16335	1.44829	1.64926
CG11929-RB	CG11929	CG11929	FBtr0343222	FBgn0031620	918	2756	0	0	0.114693	1.34078	0.0132483	0.0758766	0	0	1.51157
kat-60L1-RA	kat-60L1	CG1193	FBtr0078627	FBgn0037375	605	1817	4.3062	27.6351	0.869822	10.2205	27.2896	5.11911	0.421331	1.01266	0.169917
amn-RA	amn	CG11937	FBtr0074802	FBgn0086782	180	542	0	0	0	0.0168533	0.00253957	0	0	0	#DIV/0!
pico-RB	pico	CG11940	FBtr0074805	FBgn0261811	1034	3104	2.52074	4.4265	7.48481	3.77749	3.96382	4.95837	0.667304	1.11673	1.50953
SkpC-RA	SkpC	CG11941	FBtr0074797	FBgn0026175	158	476	1.26444	0	0.332031	1.05916	0	0.31794	1.19381	#DIV/0!	1.04432
SkpE-RA	SkpE	CG11942	FBtr0074806	FBgn0031074	167	503	0	0	0.314208	0.15573	0.0140798	0	0	0	#DIV/0!
Nup205-RA	Nup205	CG11943	FBtr0074799	FBgn0031078	2067	6203	2.03762	1.65121	1.65614	0.888144	1.0947	0.899788	2.29425	1.50837	1.84059
cora-RE	cora	CG11949	FBtr0301279	FBgn0010434	699	2099	29.2478	44.0361	103.758	18.6411	19.7423	41.6266	1.569	2.23055	2.49259
SP1029-RE	SP1029	CG11956	FBtr0345203	FBgn0263236	932	2798	17.2087	49.8202	52.4186	7.56128	16.3903	19.3611	2.2759	3.03962	2.70742
Cnx99A-RB	Cnx99A	CG11958	FBtr0085438	FBgn0015622	605	1817	101.361	131.163	113.512	59.9244	53.5472	66.9257	1.69149	2.44949	1.69609
CG11961-RA	CG11961	CG11961	FBtr0086520	FBgn0034436	891	2675	16.65	3.92234	18.3157	7.84055	1.59179	5.92624	2.12357	2.4641	3.09061
ScsﾎｲA-RG	ScsﾎｲA	CG11963	FBtr0334327	FBgn0037643	451	1355	276.729	229.72	228.03	105.311	127.453	113.805	2.62772	1.80238	2.0037
CG11964-RA	CG11964	CG11964	FBtr0082015	FBgn0037644	581	1745	6.55336	12.0255	5.79655	4.7595	10.204	5.50089	1.3769	1.17851	1.05375
ich-RA	ich	CG11966	FBtr0082014	FBgn0286204	592	1778	0.338512	0.140504	0.17778	0.0250701	0.00226663	0	13.5026	61.9879	#DIV/0!
CAHﾎｲ-RA	CAHﾎｲ	CG11967	FBtr0081958	FBgn0037646	255	767	19.6178	2.27993	2.88481	10.5885	3.48289	6.32603	1.85274	0.65461	0.456023
RagA-B-RA	RagA-B	CG11968	FBtr0082013	FBgn0037647	311	935	19.9552	24.848	25.017	11.0089	10.8731	11.59	1.81264	2.28527	2.1585
CG11970-RA	CG11970	CG11970	FBtr0081959	FBgn0027503	1658	4976	2.1772	3.91592	1.65161	2.75685	7.11112	3.05887	0.78974	0.550675	0.539943
E(var)3-9-RA	E(var)3-9	CG11971	FBtr0082012	FBgn0260243	588	1766	2.7265	4.38521	0.805447	3.83633	3.2993	2.64024	0.710704	1.32913	0.305066
CG11975-RB	CG11975	CG11975	FBtr0336753	FBgn0037648	340	1022	13.5451	40.0878	21.8049	8.91871	9.51755	7.17197	1.51873	4.21199	3.04029
CG11977-RB	CG11977	CG11977	FBtr0300742	FBgn0037650	274	824	0	0	0	1.39928	0	0	0	#DIV/0!	#DIV/0!
Rpb5-RA	Rpb5	CG11979	FBtr0088237	FBgn0033571	210	632	31.427	22.9261	14.7544	10.6409	6.97556	5.93091	2.95342	3.28663	2.48771
CG11980-RA	CG11980	CG11980	FBtr0081964	FBgn0037652	345	1037	26.118	23.6084	12.0402	14.6352	14.8412	12.0601	1.7846	1.59073	0.998348
Prosﾎｲ3-RA	Prosﾎｲ3	CG11981	FBtr0082010	FBgn0026380	205	617	79.9898	74.4993	86.5798	49.2249	25.5037	42.7209	1.62499	2.92112	2.02664
Iru-RA	Iru	CG11982	FBtr0081965	FBgn0037653	380	1142	18.4462	30.1879	13.2859	18.4424	28.6188	18.189	1.00021	1.05482	0.730433
CG11983-RB	CG11983	CG11983	FBtr0336754	FBgn0037654	421	1265	0.47579	1.1849	0.124938	2.52232	2.73898	0.793207	0.188632	0.432605	0.15751
Kcmf1-RD	Kcmf1	CG11984	FBtr0300743	FBgn0037655	599	1799	18.7354	29.1613	17.7462	36.279	50.7522	34.7425	0.516426	0.574582	0.510793
Sf3b5-RA	Sf3b5	CG11985	FBtr0082006	FBgn0040534	85	257	46.8385	115.673	31.3633	37.0918	36.954	16.242	1.26277	3.13019	1.93101
CG11986-RA	CG11986	CG11986	FBtr0081967	FBgn0037656	368	1106	2.72095	3.38809	2.71509	2.63951	2.87962	2.1076	1.03085	1.17658	1.28824
tgo-RA	tgo	CG11987	FBtr0082005	FBgn0264075	642	1928	13.7357	20.3429	11.6404	6.08051	9.68037	6.05486	2.25898	2.10145	1.92248
neur-RD	neur	CG11988	FBtr0082002	FBgn0002932	671	2015	4.18176	2.2316	1.5687	3.26035	3.50412	3.44497	1.28261	0.636851	0.45536
vnc-RB	vnc	CG11989	FBtr0076349	FBgn0263251	196	590	22.4428	20.7474	16.3404	20.3492	29.1484	31.6117	1.10288	0.711785	0.516911
hyx-RA	hyx	CG11990	FBtr0081968	FBgn0037657	538	1616	4.84181	15.4589	8.5087	7.559	16.6878	12.5654	0.640536	0.926357	0.677152
Rel-RD	Rel	CG11992	FBtr0089341	FBgn0014018	859	2579	26.3714	12.3987	29.1703	23.0229	15.973	57.9455	1.14544	0.776232	0.503409
Mst85C-RA	Mst85C	CG11993	FBtr0081969	FBgn0028708	242	728	9.09425	14.7556	4.34194	6.91507	12.7491	8.16504	1.31514	1.15738	0.531772
Ada-RA	Ada	CG11994	FBtr0081971	FBgn0037661	337	1013	1.1883	0.24661	0.93611	1.42632	0.188062	0.695752	0.833121	1.31132	1.34546
CG11997-RA	CG11997	CG11997	FBtr0081972	FBgn0037662	417	1253	0	0.797495	0.126135	0.232992	0.0329144	0.045898	0	24.2293	2.74815
CG11999-RA	CG11999	CG11999	FBtr0078807	FBgn0037312	216	650	37.9644	40.7391	42.0647	19.2838	12.6819	23.0181	1.96872	3.21239	1.82746
Aplip1-RA	Aplip1	CG1200	FBtr0072626	FBgn0040281	483	1451	24.0584	120.69	2.06953	27.6613	128.813	19.5298	0.86975	0.936936	0.105968
Prosﾎｲ7-RB	Prosﾎｲ7	CG12000	FBtr0078806	FBgn0250746	268	806	114.252	92.3635	90.3964	56.7081	37.504	58.4944	2.01473	2.46276	1.54539
spartin-RB	spartin	CG12001	FBtr0308820	FBgn0037265	553	1661	17.3931	17.7473	10.3715	3.89359	2.07225	2.67053	4.46711	8.56425	3.88369
Pxn-RE	Pxn	CG12002	FBtr0072954	FBgn0011828	1527	4583	31.7813	89.2315	7.86267	9.03487	14.2732	4.7071	3.51763	6.2517	1.67039
CG12003-RA	CG12003	CG12003	FBtr0072744	FBgn0035234	456	1370	0	0.182347	0.115362	0	0.0833335	0	#DIV/0!	2.18816	#DIV/0!
CG12004-RB	CG12004	CG12004	FBtr0072746	FBgn0035236	403	1211	37.7725	59.6174	30.2781	14.276	10.6256	14.864	2.64588	5.61073	2.03702
Mms19-RB	Mms19	CG12005	FBtr0078778	FBgn0037301	959	2879	4.18113	6.50787	4.77598	3.86718	3.03061	2.6846	1.08119	2.14738	1.77903
PIG-B-RB	PIG-B	CG12006	FBtr0073150	FBgn0035464	531	1595	12.8299	9.86732	13.0797	9.16531	13.1289	10.4866	1.39983	0.751574	1.24727
CG12007-RA	CG12007	CG12007	FBtr0078842	FBgn0037293	515	1547	14.0061	12.7572	12.4639	5.56075	9.19917	7.38204	2.51875	1.38678	1.68841
kst-RH	kst	CG12008	FBtr0332057	FBgn0004167	4207	12623	9.77456	5.26427	3.74364	5.46753	2.26279	3.00712	1.78774	2.32645	1.24492
CG12009-RB	CG12009	CG12009	FBtr0308314	FBgn0035430	864	2594	0	0	0	0.0961048	0.0124129	0	0	0	#DIV/0!
CG12010-RB	CG12010	CG12010	FBtr0073075	FBgn0035443	717	2153	1.39776	1.16031	1.83519	1.4378	1.83416	1.69388	0.972152	0.632613	1.08342
CG12011-RA	CG12011	CG12011	FBtr0072764	FBgn0035257	528	1586	0.379492	1.73264	0	0.463721	0.407612	0.0580001	0.818363	4.25071	0
CG12012-RA	CG12012	CG12012	FBtr0073076	FBgn0035444	122	368	55.6079	49.5558	78.5938	27.2541	26.1696	57.7341	2.04035	1.89364	1.36131
PHGPx-RA	PHGPx	CG12013	FBtr0073067	FBgn0035438	169	509	297.981	236.073	360.185	162.584	121.029	258.498	1.83278	1.95054	1.39338
Ids-RA	Ids	CG12014	FBtr0073077	FBgn0035445	512	1538	4.30469	1.29943	23.9433	3.61068	2.01883	28.9525	1.19221	0.643656	0.826988
RabX6-RB	RabX6	CG12015	FBtr0330078	FBgn0035155	222	668	7.20807	14.959	7.5711	5.80216	9.01628	6.6791	1.24231	1.65911	1.13355
CG12016-RB	CG12016	CG12016	FBtr0073064	FBgn0035436	323	971	39.6704	22.6403	22.1363	18.2554	21.7384	20.63	2.17307	1.04149	1.07302
CG12017-RC	CG12017	CG12017	FBtr0308312	FBgn0035429	589	1769	0	0.141218	0.268027	0.0901993	0.00815508	0.0162457	0	17.3166	16.4984
Pol31-RA	Pol31	CG12018	FBtr0072775	FBgn0027903	431	1295	2.32384	7.13758	3.41722	2.24152	3.64064	1.8744	1.03672	1.96053	1.8231
Cdc37-RA	Cdc37	CG12019	FBtr0072777	FBgn0011573	389	1169	43.2484	55.562	41.641	19.1331	23.6547	17.975	2.2604	2.34888	2.31661
CG12020-RA	CG12020	CG12020	FBtr0072778	FBgn0035273	366	1100	0	0	0	2.91445	0.00808285	0.0241527	0	0	0
Patj-RB	Patj	CG12021	FBtr0072781	FBgn0067864	871	2615	21.1749	32.5763	6.04385	7.45268	10.1289	5.88025	2.84125	3.21618	1.02782
GV1-RA	GV1	CG12023	FBtr0072784	FBgn0027790	293	881	105.892	49.3393	44.6692	40.7377	5.93437	17.3732	2.59935	8.31415	2.57116
CG12024-RB	CG12024	CG12024	FBtr0072833	FBgn0035283	276	830	30.4563	81.2653	20.1843	25.95	73.0905	26.7228	1.17365	1.11184	0.75532
CG12025-RC	CG12025	CG12025	FBtr0345381	FBgn0035285	170	512	65.83	114.173	32.4119	39.5253	87.6557	38.0386	1.66552	1.30252	0.85208
Tmhs-RB	Tmhs	CG12026	FBtr0072836	FBgn0262624	265	797	0.755175	0.940334	1.98302	2.10598	0.191826	0.764271	0.358586	4.90201	2.59465
ATPsynCF6L-RA	ATPsynCF6L	CG12027	FBtr0073372	FBgn0035585	147	443	0	0	0	4.72119	0.110665	0.173215	0	0	0
dib-RA	dib	CG12028	FBtr0073205	FBgn0000449	489	1469	0	0	0	0.0674645	0.00508299	0	0	0	#DIV/0!
dar1-RB	dar1	CG12029	FBtr0113134	FBgn0263239	751	2255	0.533813	0.77548	0.630785	1.18404	0.227769	0.538812	0.45084	3.40468	1.1707
Gale-RB	Gale	CG12030	FBtr0306917	FBgn0035147	350	1052	73.804	21.372	22.6854	40.8622	30.6063	36.0895	1.80617	0.69829	0.628588
MED14-RA	MED14	CG12031	FBtr0072554	FBgn0035145	1553	4661	3.48651	5.3061	3.08566	2.20982	3.76072	2.92332	1.57773	1.41093	1.05553
nSMase-RA	nSMase	CG12034	FBtr0073043	FBgn0035421	442	1328	4.9854	6.39588	2.85626	9.1914	15.1955	7.82599	0.542399	0.420907	0.364972
CG12035-RA	CG12035	CG12035	FBtr0072766	FBgn0035263	300	902	0	0	0	3.40697	0.00798005	0.0397425	0	0	0
CG12038-RA	CG12038	CG12038	FBtr0072619	FBgn0035179	407	1223	4.92129	17.5667	0.9046	7.76332	30.4546	4.87599	0.633916	0.576818	0.185521
DCTN4-p62-RA	DCTN4-p62	CG12042	FBtr0088944	FBgn0033206	514	1544	16.762	25.8876	16.8897	6.6671	11.9937	7.46855	2.51414	2.15843	2.26144
Cpr100A-RA	Cpr100A	CG12045	FBtr0085710	FBgn0039805	241	725	9.96206	159.882	181.59	5.83379	6.06123	13.0469	1.70765	26.3778	13.9183
mud-RF	mud	CG12047	FBtr0308325	FBgn0002873	2394	7184	0.16756	0.139095	0.0439996	0.853257	0.0290873	0.109591	0.196377	4.782	0.40149
ppk21-RB	ppk21	CG12048	FBtr0332440	FBgn0039675	548	1646	0	0	0	0.134833	0.256001	0.0971387	0	0	0
l(2)05287-RB	l(2)05287	CG12050	FBtr0114615	FBgn0284251	1071	3215	5.42904	3.88515	2.26132	2.68071	1.99853	1.8293	2.02522	1.94401	1.23617
Act42A-RA	Act42A	CG12051	FBtr0086029	FBgn0000043	376	1130	51.1327	80.0294	28.6722	31.9858	18.8924	20.9824	1.5986	4.23606	1.36649
lola-RF	lola	CG12052	FBtr0089348	FBgn0283521	565	1697	71.2886	117.621	48.6154	29.029	65.0408	46.243	2.45578	1.80842	1.0513
CG12054-RE	CG12054	CG12054	FBtr0335408	FBgn0039831	516	1550	4.65967	21.2746	5.914	19.0472	26.3803	13.3214	0.244638	0.806459	0.443948
Gapdh1-RB	Gapdh1	CG12055	FBtr0100479	FBgn0001091	332	998	648.915	533.674	987.395	499.208	266.031	492.082	1.29989	2.00606	2.00657
CG12056-RA	CG12056	CG12056	FBtr0071305	FBgn0030099	287	863	13.9484	15.3421	18.6799	8.42096	17.083	15.3769	1.65639	0.89809	1.2148
CG12057-RA	CG12057	CG12057	FBtr0071304	FBgn0030098	219	659	0	12.8888	4.07708	14.4147	0.0562719	0.201778	0	229.045	20.2058
CG12061-RD	CG12061	CG12061	FBtr0332625	FBgn0040031	441	1325	0	0	0	0.935988	0.0136491	0.0271902	0	0	0
mey-RB	mey	CG12063	FBtr0346230	FBgn0039851	774	2324	0	0.107494	0	0.103161	0	0.0216768	0	#DIV/0!	0
CG12065-RD	CG12065	CG12065	FBtr0071217	FBgn0030052	641	1925	29.7029	9.99262	86.1251	8.68857	3.00169	16.4082	3.41862	3.32899	5.24889
Pka-C2-RB	Pka-C2	CG12066	FBtr0085727	FBgn0000274	354	1064	0	0	0.14854	2.91375	0.00744174	0.0518862	0	0	2.8628
sro-RA	sro	CG12068	FBtr0085481	FBgn0262112	335	1007	0	0.248079	0.156948	0.288653	0.147887	0.0173297	0	1.67749	9.05661
CG12069-RC	CG12069	CG12069	FBtr0335455	FBgn0039796	356	1070	0	0	0	4.5155	0.0159474	0.0397109	0	0	0
Sap-r-RB	Sap-r	CG12070	FBtr0085714	FBgn0000416	876	2630	546.035	286.48	428.228	130.935	61.7022	177.699	4.17028	4.64295	2.40986
CG12071-RF	CG12071	CG12071	FBtr0346757	FBgn0039808	338	1016	13.6251	48.6845	1.40002	18.4975	67.158	12.5634	0.736593	0.724925	0.111436
wts-RA	wts	CG12072	FBtr0085720	FBgn0011739	1105	3317	4.17338	7.23011	9.00537	9.39486	12.1633	14.8928	0.44422	0.594421	0.604678
5-HT7-RB	5-HT7	CG12073	FBtr0334508	FBgn0004573	564	1694	0	3.24436	0.559787	2.69297	7.3468	1.74083	0	0.441602	0.321563
CG12075-RD	CG12075	CG12075	FBtr0335034	FBgn0030065	994	2984	5.44591	3.43245	3.6016	4.6347	2.71067	4.19539	1.17503	1.26627	0.858466
Ythdc1-RA	Ythdc1	CG12076	FBtr0073078	FBgn0027616	721	2165	7.22805	14.0774	5.32905	24.3686	11.5599	13.2956	0.296613	1.21778	0.400814
PIG-C-RB	PIG-C	CG12077	FBtr0300753	FBgn0035435	286	860	4.19912	2.61435	1.10265	1.55027	1.14678	1.54113	2.70865	2.27972	0.715482
CG12078-RA	CG12078	CG12078	FBtr0073092	FBgn0035426	253	761	0	0	0	1.676	0	0.0209627	0	#DIV/0!	0
ND-30-RA	ND-30	CG12079	FBtr0073113	FBgn0266582	265	797	148.769	284.294	116.998	105.688	221.38	102.717	1.40762	1.28419	1.13903
CG1208-RB	CG1208	CG1208	FBtr0113196	FBgn0037386	496	1490	9.29068	1.50895	27.8968	4.95767	0.995556	7.64239	1.874	1.51569	3.65028
CG12081-RA	CG12081	CG12081	FBtr0071218	FBgn0030053	403	1211	5.46707	13.615	3.00171	5.10762	9.44185	5.10486	1.07037	1.44199	0.58801
Usp5-RB	Usp5	CG12082	FBtr0307308	FBgn0035402	827	2483	14.3015	19.5184	8.59295	6.54887	7.26392	4.97004	2.18381	2.68703	1.72895
CG12084-RB	CG12084	CG12084	FBtr0332656	FBgn0043458	765	2297	17.8178	43.0679	11.8346	8.6584	17.9478	8.64129	2.05786	2.39962	1.36954
hfp-RA	hfp	CG12085	FBtr0072709	FBgn0028577	637	1913	14.4727	27.0318	13.2187	59.6021	40.0676	33.6717	0.242821	0.674654	0.392578
cue-RA	cue	CG12086	FBtr0072706	FBgn0011204	644	1934	28.3198	18.6005	12.3397	11.3057	9.4332	12.0483	2.50492	1.97181	1.02419
Iml1-RC	Iml1	CG12090	FBtr0072705	FBgn0035227	1472	4418	5.72176	5.59795	3.61311	13.9936	9.97839	10.5589	0.408885	0.561007	0.342186
CG12091-RA	CG12091	CG12091	FBtr0072831	FBgn0035228	321	965	31.8089	68.6022	27.6786	45.3516	114.853	59.9295	0.701384	0.597304	0.461853
Npc1b-RA	Npc1b	CG12092	FBtr0077239	FBgn0261675	1254	3764	0	1.19465	1.84752	0.637523	0.0227525	0.0251806	0	52.5065	73.3707
CG12093-RA	CG12093	CG12093	FBtr0073015	FBgn0035372	380	1142	23.1896	7.87509	44.9782	14.0336	16.654	24.1879	1.65243	0.472864	1.85953
CG12096-RB	CG12096	CG12096	FBtr0340298	FBgn0030457	506	1520	13.8589	15.2848	13.6211	5.71559	7.32346	5.93942	2.42476	2.08709	2.29334
CG12099-RA	CG12099	CG12099	FBtr0072829	FBgn0035232	708	2126	14.7213	18.4483	10.1102	24.1238	64.3669	39.8589	0.61024	0.286611	0.25365
Pdk1-RB	Pdk1	CG1210	FBtr0072470	FBgn0020386	539	1619	49.0719	48.6052	22.2573	31.5946	42.0417	35.6851	1.55317	1.15612	0.623716
Hsp60A-RB	Hsp60A	CG12101	FBtr0073435	FBgn0015245	573	1721	166.818	309.765	80.1712	66.211	189.131	47.376	2.51949	1.63784	1.69223
CG12104-RB	CG12104	CG12104	FBtr0333360	FBgn0035238	250	752	18.4084	15.6135	11.7694	9.59447	14.0099	8.13241	1.91865	1.11446	1.44723
CG12105-RB	CG12105	CG12105	FBtr0331463	FBgn0035241	1154	3464	0.347502	0.28847	1.32314	0.977926	0.0763115	1.40749	0.355346	3.78017	0.940069
CG12106-RA	CG12106	CG12106	FBtr0071306	FBgn0030100	211	635	8.5305	12.9825	8.46234	4.28927	11.8169	5.69197	1.9888	1.09864	1.48671
CG12107-RA	CG12107	CG12107	FBtr0088924	FBgn0033209	135	407	45.843	68.1315	50.0934	40.978	38.8205	52.5534	1.11872	1.75504	0.95319
Ppt1-RA	Ppt1	CG12108	FBtr0071225	FBgn0030057	314	944	9.56368	4.76343	12.0544	5.6995	2.44725	5.77637	1.67799	1.94644	2.08685
Caf1-180-RB	Caf1-180	CG12109	FBtr0071228	FBgn0030054	1183	3551	0.677977	0.562806	1.02368	1.74668	0.36004	0.910143	0.388151	1.56318	1.12474
Pld-RG	Pld	CG12110	FBtr0336520	FBgn0286511	1260	3782	0.477425	0.52843	1.75514	2.09295	0.63154	2.60503	0.228111	0.836733	0.673751
CG12111-RA	CG12111	CG12111	FBtr0071232	FBgn0030050	188	566	2.12676	0.88274	0	2.00603	0.111367	0.554631	1.06019	7.92643	0
CG12112-RA	CG12112	CG12112	FBtr0071233	FBgn0030048	201	605	2.9845	3.71626	1.5674	5.5468	4.99698	2.47966	0.538058	0.743701	0.632104
IntS4-RA	IntS4	CG12113	FBtr0071234	FBgn0026679	1022	3068	5.29681	4.55986	2.06058	2.28093	3.67263	3.15901	2.32221	1.24158	0.652287
spn-F-RB	spn-F	CG12114	FBtr0330079	FBgn0086362	376	1130	9.58738	14.591	10.2101	10.8383	12.5949	12.1014	0.884586	1.15849	0.843709
CG12115-RA	CG12115	CG12115	FBtr0071341	FBgn0030097	263	791	0	0	0	0.0255547	0	0.0460263	0	#DIV/0!	0
CG12116-RA	CG12116	CG12116	FBtr0071240	FBgn0030041	273	821	102.634	10.9541	16.1704	110.102	50.559	111.176	0.932173	0.216661	0.145449
Sptr-RA	Sptr	CG12117	FBtr0071241	FBgn0014032	261	785	34.5023	38.1883	25.1667	10.7247	10.2233	10.2879	3.2171	3.73541	2.44624
CG12118-RB	CG12118	CG12118	FBtr0071340	FBgn0030101	284	854	14.8002	25.1571	16.1008	22.1189	21.2331	20.8634	0.669118	1.1848	0.771722
SmydA-9-RA	SmydA-9	CG12119	FBtr0071336	FBgn0030102	500	1502	4.80858	0.332644	0.315672	2.7476	0.224061	1.35361	1.7501	1.48461	0.233209
p130CAS-RE	p130CAS	CG1212	FBtr0299865	FBgn0035101	567	1703	3.5342	13.2022	6.68195	11.6405	30.3381	8.49063	0.303614	0.43517	0.786979
t-RB	t	CG12120	FBtr0340327	FBgn0086367	387	1163	259.794	1016.02	42.2635	34.3039	29.7845	16.408	7.57331	34.1122	2.57579
CG12121-RA	CG12121	CG12121	FBtr0071334	FBgn0030109	738	2216	20.3703	27.845	16.6177	9.82554	12.2988	10.3716	2.0732	2.26403	1.60224
CG12123-RA	CG12123	CG12123	FBtr0071245	FBgn0030039	218	656	4.58746	15.6135	8.43237	6.82803	8.92347	4.75058	0.671856	1.74971	1.77502
mxc-RA	mxc	CG12124	FBtr0071332	FBgn0260789	1837	5513	0.982563	1.22347	0.688032	1.09308	1.92183	0.756714	0.89889	0.63662	0.909236
Miga-RA	Miga	CG12125	FBtr0071246	FBgn0030037	525	1577	3.05326	6.6533	4.20923	7.32978	9.65616	4.47314	0.416556	0.689021	0.941001
CG12126-RA	CG12126	CG12126	FBtr0088801	FBgn0033280	109	329	0	0	0	10.2042	0.0165932	0.0330552	0	0	0
amx-RB	amx	CG12127	FBtr0307281	FBgn0000077	284	854	15.505	17.5514	11.104	3.9793	3.94593	4.44226	3.8964	4.44799	2.49962
CG12128-RA	CG12128	CG12128	FBtr0088393	FBgn0033473	485	1457	4.9571	6.00106	3.47117	6.42836	4.25836	5.65118	0.771129	1.40924	0.614237
CG12129-RA	CG12129	CG12129	FBtr0088395	FBgn0033475	352	1058	10.2398	22.1953	11.5024	7.76082	16.6424	9.51499	1.31943	1.33366	1.20888
CG1213-RA	CG1213	CG1213	FBtr0078643	FBgn0037387	491	1475	144.042	18.2916	59.7898	56.7094	9.32062	65.4179	2.54	1.96248	0.913968
Pal1-RD	Pal1	CG12130	FBtr0339423	FBgn0283510	541	1625	47.7796	24.136	9.23965	11.9729	7.74366	6.97932	3.99063	3.11688	1.32386
eIF3j-RB	eIF3j	CG12131	FBtr0339425	FBgn0027619	236	710	72.0554	88.6669	56.9858	61.6843	83.9655	86.7195	1.16813	1.05599	0.657128
c11.1-RB	c11.1	CG12132	FBtr0343368	FBgn0040236	1742	5228	9.90076	11.946	8.76693	2.97096	4.51136	4.7788	3.33251	2.64799	1.83455
CG12133-RB	CG12133	CG12133	FBtr0339424	FBgn0033469	340	1022	0	0	0	0	0	0	#DIV/0!	#DIV/0!	#DIV/0!
CG12134-RA	CG12134	CG12134	FBtr0088388	FBgn0033471	411	1235	4.87348	3.64103	6.01473	3.12878	1.37492	3.2042	1.55763	2.64817	1.87714
c12.1-RA	c12.1	CG12135	FBtr0071324	FBgn0040235	259	779	26.2692	46.8203	15.0134	12.3868	15.0503	12.7358	2.12075	3.11092	1.17884
ru-RA	ru	CG1214	FBtr0072681	FBgn0003295	341	1025	0.587194	1.70606	0	1.27215	5.95746	0.722969	0.461576	0.286373	0
Etf-QO-RB	Etf-QO	CG12140	FBtr0308338	FBgn0286783	604	1814	78.967	11.0172	41.6462	17.7023	4.33244	15.9194	4.46083	2.54296	2.61607
LysRS-RA	LysRS	CG12141	FBtr0071366	FBgn0027084	574	1724	21.9942	18.5478	15.5846	16.692	21.2709	17.6472	1.31766	0.871981	0.883125
Tsp42Eg-RA	Tsp42Eg	CG12142	FBtr0089024	FBgn0033128	218	656	11.9274	4.18898	26.5017	16.1506	2.67028	16.093	0.738511	1.56874	1.64678
Tsp42Ej-RA	Tsp42Ej	CG12143	FBtr0089030	FBgn0033132	227	683	139.233	429.405	16.4294	181.477	328.198	131.665	0.767221	1.30837	0.124782
CG12147-RA	CG12147	CG12147	FBtr0078793	FBgn0037325	477	1433	0.42001	0.17433	0.110291	2.03379	0	0.0582273	0.206516	#DIV/0!	1.89414
c12.2-RA	c12.2	CG12149	FBtr0071321	FBgn0040234	1386	4160	4.91916	2.10181	3.57125	2.66909	2.38804	3.43019	1.84301	0.880142	1.04112
Pdp-RA	Pdp	CG12151	FBtr0071076	FBgn0029958	475	1427	5.48309	8.40304	5.42697	12.9702	24.0636	13.5861	0.422745	0.349201	0.399451
Hira-RA	Hira	CG12153	FBtr0071070	FBgn0022786	1047	3143	1.14898	0.874314	0.553138	2.11032	3.65451	2.16065	0.544458	0.239242	0.256006
oc-RD	oc	CG12154	FBtr0331305	FBgn0004102	542	1628	16.6366	28.0812	4.75693	6.52442	15.931	5.84847	2.54989	1.76268	0.813364
CG12155-RA	CG12155	CG12155	FBtr0071071	FBgn0029957	555	1667	9.38736	13.3375	11.2823	4.84953	8.84753	6.68474	1.93572	1.50748	1.68777
Rab39-RB	Rab39	CG12156	FBtr0307272	FBgn0029959	218	656	49.5445	47.2212	43.3665	22.4282	21.9985	24.1731	2.20903	2.14657	1.794
Tom40-RC	Tom40	CG12157	FBtr0333748	FBgn0016041	344	1034	36.6713	63.7827	16.2021	24.4788	24.2527	10.0451	1.49808	2.62992	1.61293
CG12158-RA	CG12158	CG12158	FBtr0088557	FBgn0040775	61	185	2983.34	162.042	176.841	959.282	83.0459	215.395	3.10998	1.95124	0.821009
CG12159-RA	CG12159	CG12159	FBtr0088888	FBgn0033232	202	608	30.6877	45.6078	53.5487	11.9404	15.5383	21.843	2.57008	2.93519	2.45152
mri-RB	mri	CG1216	FBtr0072480	FBgn0035107	439	1319	8.2136	11.3639	11.1435	12.0946	9.60614	11.7234	0.679115	1.18298	0.950537
Prosﾎｲ2R2-RA	Prosﾎｲ2R2	CG12161	FBtr0078831	FBgn0037296	322	968	0	0	0.163271	1.02701	0.015222	0.128875	0	0	1.26689
POLDIP2-RA	POLDIP2	CG12162	FBtr0078680	FBgn0037329	410	1232	12.7019	29.6047	9.49306	22.4298	31.7406	16.262	0.566295	0.93271	0.583756
CG12163-RB	CG12163	CG12163	FBtr0078822	FBgn0260462	475	1427	273.311	275.9	394.507	83.8252	38.7954	130.51	3.26049	7.11166	3.0228
CG12164-RA	CG12164	CG12164	FBtr0088963	FBgn0033158	329	989	0.608568	0	0	0.079085	0.0500515	0.0427317	7.69512	0	0
Incenp-RB	Incenp	CG12165	FBtr0336908	FBgn0260991	755	2267	0	0.661179	0	2.06808	0.453159	0.821407	0	1.45904	0
Ppm1-RA	Ppm1	CG12169	FBtr0072553	FBgn0035143	352	1058	0	0	0	4.01351	0.0564777	0.119541	0	0	0
CG12170-RA	CG12170	CG12170	FBtr0078709	FBgn0037356	438	1316	8.68967	10.2508	8.40674	8.68633	13.7118	11.2772	1.00038	0.747586	0.745463
CG12171-RA	CG12171	CG12171	FBtr0078708	FBgn0037354	257	773	48.2745	23.2687	56.8395	16.7758	12.3853	44.3752	2.87764	1.87874	1.28089
Spn43Aa-RA	Spn43Aa	CG12172	FBtr0089041	FBgn0024294	390	1172	0	0	0.134852	0.291747	0.0310322	0.0231821	0	0	5.81708
CG12173-RA	CG12173	CG12173	FBtr0078821	FBgn0037305	256	770	18.7597	25.9548	19.4993	17.4173	19.7768	15.6966	1.07707	1.31239	1.24226
tth-RB	tth	CG12175	FBtr0073849	FBgn0030502	428	1286	11.2325	6.02199	5.28461	9.28864	8.87704	9.32583	1.20927	0.678378	0.566663
DNAlig4-RA	DNAlig4	CG12176	FBtr0073847	FBgn0030506	918	2756	4.58612	5.25736	4.93179	1.33681	2.36773	1.91761	3.43066	2.22042	2.57184
CG12177-RB	CG12177	CG12177	FBtr0340399	FBgn0030510	362	1088	12.7234	2.75532	62.1728	13.9666	11.0096	29.2126	0.910991	0.250265	2.12829
Nhe1-RB	Nhe1	CG12178	FBtr0301452	FBgn0026787	649	1949	6.48505	13.9712	16.2182	5.71064	9.06689	8.00799	1.13561	1.5409	2.02525
CG12179-RC	CG12179	CG12179	FBtr0300754	FBgn0025388	1322	3968	0.303364	0.75549	0.517794	1.68282	1.71912	0.707362	0.180272	0.439464	0.732007
CG1218-RA	CG1218	CG1218	FBtr0078630	FBgn0037377	449	1349	8.03094	10.1852	4.80349	4.75128	5.63646	3.12932	1.69027	1.80702	1.53499
Sgs4-RC	Sgs4	CG12181	FBtr0346736	FBgn0003374	287	863	0	0	0	0.0233267	0	0.0105034	0	#DIV/0!	0
CG12182-RA	CG12182	CG12182	FBtr0072955	FBgn0028504	694	2084	1.44404	3.35645	0.682543	1.47234	2.37407	0.920536	0.980774	1.4138	0.741463
CG12184-RC	CG12184	CG12184	FBtr0343532	FBgn0025387	826	2480	0.242691	0.402928	0.382371	1.10418	0.42236	0.173839	0.219794	0.953992	2.19957
ProRS-m-RA	ProRS-m	CG12186	FBtr0072948	FBgn0027082	458	1376	0.874817	4.9019	1.26345	3.09045	7.50423	3.20717	0.283071	0.653218	0.393947
Rev1-RA	Rev1	CG12189	FBtr0072557	FBgn0035150	995	2987	1.41049	3.1781	1.74608	1.67032	2.46021	1.80627	0.844439	1.2918	0.966677
RYBP-RA	RYBP	CG12190	FBtr0071868	FBgn0034763	150	452	2.66316	13.8172	5.59457	8.99472	22.2617	9.79574	0.29608	0.620674	0.571123
dpr20-RA	dpr20	CG12191	FBtr0072594	FBgn0035170	525	1577	3.05326	14.0987	0.501099	6.04013	26.5549	4.88368	0.505496	0.530925	0.102607
Klp59D-RA	Klp59D	CG12192	FBtr0071968	FBgn0034827	729	2189	0.274954	0	0.0722004	2.95916	0.00401717	0.112036	0.0929161	0	0.644439
Or22a-RA	Or22a	CG12193	FBtr0077873	FBgn0026398	397	1193	0	0	0	0	0.021194	0	#DIV/0!	0	#DIV/0!
CG12194-RA	CG12194	CG12194	FBtr0077385	FBgn0031636	485	1457	3.71782	27.6049	0.867792	16.6381	54.8159	10.7346	0.223453	0.503592	0.0808403
egg-RA	egg	CG12196	FBtr0112777	FBgn0086908	1262	3788	4.6078	6.33112	2.87889	2.18856	4.12317	2.26805	2.10541	1.5355	1.26932
kek5-RD	kek5	CG12199	FBtr0309224	FBgn0031016	931	2795	10.121	9.1167	10.348	2.98262	10.1827	5.04098	3.39332	0.895314	2.05277
Kaz1-ORFB-RA	Kaz1-ORFB	CG1220	FBtr0072488	FBgn0063923	114	344	71.735	15.2504	39.0522	56.2289	26.0619	88.961	1.27577	0.58516	0.438982
narya-RA	narya	CG12200	FBtr0074710	FBgn0031018	211	635	0	0.39341	0.746677	0.201272	0.0101097	0.181255	0	38.9142	4.11949
GC2-RB	GC2	CG12201	FBtr0082485	FBgn0037970	319	959	0	0	0	7.8036	0.34714	0.158866	0	0	0
Naa15-16-RA	Naa15-16	CG12202	FBtr0074711	FBgn0031020	890	2672	13.2899	10.1908	5.73747	6.2617	5.4223	4.79898	2.12241	1.87943	1.19556
ND-18-RA	ND-18	CG12203	FBtr0074712	FBgn0031021	183	551	128.895	274.298	102.114	98.6017	153.982	79.0823	1.30723	1.78136	1.29123
CG12204-RA	CG12204	CG12204	FBtr0074783	FBgn0031022	323	971	0.61985	2.57276	1.4649	3.24103	6.76496	4.95456	0.191251	0.380308	0.295667
Bsg25A-RA	Bsg25A	CG12205	FBtr0077423	FBgn0000227	363	1091	0	0	0	0.0657014	0.0222757	0	0	0	#DIV/0!
CG12206-RC	CG12206	CG12206	FBtr0070529	FBgn0029662	582	1748	0.344322	0.57166	0.271247	0.44452	0.0299286	0.0553619	0.774593	19.1008	4.89953
red-RE	red	CG12207	FBtr0309998	FBgn0285913	343	1031	17.5133	21.5651	27.2864	33.5007	62.8851	53.0472	0.522774	0.342928	0.51438
CG12209-RA	CG12209	CG12209	FBtr0088364	FBgn0033498	285	857	0	0	0	3.52021	0.0395856	0.0552007	0	0	0
miple1-RA	miple1	CG1221	FBtr0072504	FBgn0027111	185	557	285.269	1464.36	21.5647	95.3597	360.578	63.015	2.9915	4.06114	0.342216
Syb-RA	Syb	CG12210	FBtr0088362	FBgn0003660	129	389	89.7396	34.6787	198.269	57.1337	22.4344	147.629	1.5707	1.54579	1.34302
peb-RB	peb	CG12212	FBtr0100265	FBgn0003053	1894	5684	1.58834	4.70272	0.389277	5.75695	10.6959	4.41573	0.275899	0.439673	0.0881571
CG12213-RE	CG12213	CG12213	FBtr0334156	FBgn0260742	525	1577	29.7693	57.0283	23.9525	10.6073	9.23629	9.37195	2.80649	6.17437	2.55577
mlt-RA	mlt	CG12214	FBtr0088370	FBgn0265512	459	1379	54.9936	42.753	90.7708	49.8066	54.7589	86.4579	1.10414	0.78075	1.04988
PpV-RC	PpV	CG12217	FBtr0331431	FBgn0003139	303	911	17.1775	26.5994	21.1654	13.5409	21.4527	16.6028	1.26857	1.23991	1.27481
mei-P26-RB	mei-P26	CG12218	FBtr0333473	FBgn0026206	1189	3569	13.3225	29.8183	5.09256	41.9102	76.5664	36.8478	0.317883	0.389443	0.138205
CG12219-RA	CG12219	CG12219	FBtr0070925	FBgn0043796	562	1688	1.7828	5.62381	2.34074	4.19271	5.43733	2.90364	0.425215	1.0343	0.80614
mRpL32-RA	mRpL32	CG12220	FBtr0085759	FBgn0039835	195	587	18.4561	36.5999	15.6162	13.6271	20.2917	9.1328	1.35437	1.80369	1.7099
Dsp1-RB	Dsp1	CG12223	FBtr0089259	FBgn0278608	385	1157	51.5	108.606	51.2251	11.2198	31.527	16.1801	4.5901	3.44485	3.16594
Spt6-RA	Spt6	CG12225	FBtr0070896	FBgn0028982	1831	5495	12.4866	18.8214	7.53562	6.86092	16.8151	9.18676	1.81995	1.11932	0.82027
SkpF-RA	SkpF	CG12227	FBtr0072022	FBgn0034863	171	515	0	0	0	5.55975	0	0.0287747	0	#DIV/0!	0
CG12229-RA	CG12229	CG12229	FBtr0075226	FBgn0036723	571	1715	0	0	0	5.86901	0.0307313	0.0816262	0	0	0
car-RA	car	CG12230	FBtr0074728	FBgn0000257	617	1853	5.52178	15.9084	4.17932	4.48874	11.3096	5.11745	1.23014	1.40663	0.81668
CG12231-RA	CG12231	CG12231	FBtr0074779	FBgn0031026	183	551	0	0	0	1.68661	0	0.0703179	0	#DIV/0!	0
Gﾎｱf-RA	Gﾎｱf	CG12232	FBtr0075354	FBgn0010223	399	1199	1.00396	1.04177	1.31815	0.936956	0.148521	1.07389	1.07151	7.01428	1.22746
Idh3a-RC	Idh3a	CG12233	FBtr0307904	FBgn0027291	354	1064	121.054	299.825	141.41	123.633	118.963	81.7185	0.979138	2.52033	1.73045
Ranbp21-RA	Ranbp21	CG12234	FBtr0074759	FBgn0031051	1241	3725	4.201	3.82268	2.03657	2.32768	3.0755	1.88617	1.8048	1.24294	1.07974
Arp10-RA	Arp10	CG12235	FBtr0074760	FBgn0031050	378	1136	20.6629	30.1274	16.4168	9.45497	15.3725	13.7617	2.1854	1.95982	1.19294
CG12236-RB	CG12236	CG12236	FBtr0070826	FBgn0029822	510	1532	5.89302	9.45776	1.96011	5.00719	11.3904	5.54597	1.17691	0.830326	0.353429
CG12237-RA	CG12237	CG12237	FBtr0074761	FBgn0031048	306	920	12.43	36.6577	7.38696	19.3502	58.9778	31.1649	0.642372	0.621551	0.237028
e(y)3-RB	e(y)3	CG12238	FBtr0334278	FBgn0087008	2006	6020	3.89919	9.25396	3.78052	4.74154	12.8246	6.82886	0.822346	0.721577	0.553609
CG12239-RA	CG12239	CG12239	FBtr0070814	FBgn0029810	650	1952	111.926	1062.74	5.42476	56.9631	757.515	27.373	1.96489	1.40293	0.198179
CG12241-RA	CG12241	CG12241	FBtr0083051	FBgn0038304	804	2414	2.74259	9.31375	2.94619	3.55492	6.70045	2.86649	0.771493	1.39002	1.02781
GstD5-RA	GstD5	CG12242	FBtr0082572	FBgn0010041	216	650	32.4086	7.3023	25.2875	2.08852	0.501945	5.52337	15.5175	14.548	4.57826
lic-RA	lic	CG12244	FBtr0073720	FBgn0261524	334	1004	13.788	14.6804	14.3249	9.19698	15.1947	11.9212	1.49918	0.966151	1.20164
gcm-RB	gcm	CG12245	FBtr0335492	FBgn0014179	504	1514	0	0.495011	0	0.194171	0.29105	0.0460157	0	1.70078	0
mira-RA	mira	CG12249	FBtr0083847	FBgn0021776	829	2489	0	0	0.063498	0.28461	0.0101574	0.0741931	0	0	0.855848
ymp-RA	ymp	CG12250	FBtr0084894	FBgn0261287	139	419	0	0	0	12.2751	0	0.0629872	0	#DIV/0!	0
AQP-RB	AQP	CG12251	FBtr0300286	FBgn0033807	266	800	16.5515	2.18588	2.96337	13.498	0.543321	5.50331	1.22622	4.02319	0.538471
Fcp1-RA	Fcp1	CG12252	FBtr0072342	FBgn0035026	880	2642	7.51773	17.6819	3.88835	5.10107	22.4857	5.63301	1.47376	0.786362	0.69028
CG12253-RA	CG12253	CG12253	FBtr0080149	FBgn0026148	378	1136	6.35783	11.4352	3.75639	4.10114	8.96215	2.35465	1.55026	1.27595	1.5953
MED25-RA	MED25	CG12254	FBtr0083825	FBgn0038760	863	2591	5.80735	10.2202	6.40482	1.58163	2.25748	1.2725	3.67175	4.52724	5.03328
Cpr72Eb-RA	Cpr72Eb	CG12255	FBtr0075383	FBgn0036618	217	653	0	0	0	0	0.0248181	0.0617998	#DIV/0!	0	0
CG12256-RA	CG12256	CG12256	FBtr0082621	FBgn0038002	283	851	2.82902	1.46778	15.6004	3.34887	0.365051	6.0423	0.844768	4.02074	2.58186
CG12259-RA	CG12259	CG12259	FBtr0085270	FBgn0039557	359	1079	6.69369	6.94575	4.39425	4.13486	5.18059	3.65942	1.61884	1.34073	1.2008
mRpS22-RA	mRpS22	CG12261	FBtr0085247	FBgn0039555	393	1181	19.8756	31.0947	16.3266	15.4671	24.6743	19.1111	1.28502	1.26021	0.854298
Mcad-RA	Mcad	CG12262	FBtr0076808	FBgn0035811	419	1259	286.356	42.6611	128.797	79.9667	15.3985	42.0638	3.58094	2.77047	3.06195
PIG-O-RA	PIG-O	CG12263	FBtr0086691	FBgn0034346	1077	3233	2.60632	3.32263	4.59523	3.04003	5.03901	3.0632	0.857334	0.659382	1.50014
Nfs1-RA	Nfs1	CG12264	FBtr0080290	FBgn0032393	462	1388	40.7609	80.992	86.6524	22.6706	29.1737	40.0295	1.79796	2.7762	2.16471
Det-RA	Det	CG12265	FBtr0083408	FBgn0264291	153	461	3.91675	15.7151	10.285	4.43459	5.22763	4.05498	0.883227	3.00615	2.53639
CG12267-RA	CG12267	CG12267	FBtr0082635	FBgn0038057	522	1568	2.68694	2.70846	1.51193	2.59454	4.88072	3.20955	1.03561	0.55493	0.471071
CG12268-RB	CG12268	CG12268	FBtr0084514	FBgn0039131	531	1595	4.90556	4.5421	7.33257	3.90551	0.508516	1.26911	1.25606	8.93207	5.77773
euc-RB	euc	CG12269	FBtr0304691	FBgn0038665	112	338	276.007	47.3023	1375.66	86.3143	10.6071	435.27	3.1977	4.45948	3.16048
CG1227-RB	CG1227	CG1227	FBtr0339736	FBgn0037491	320	962	11.2617	7.53082	4.60011	6.0152	4.19	3.37282	1.8722	1.79733	1.36388
Strump-RC	Strump	CG12272	FBtr0333292	FBgn0036571	1167	3503	2.23362	5.77649	2.43635	2.75031	4.68482	2.57974	0.812135	1.23302	0.944414
angel-RA	angel	CG12273	FBtr0072083	FBgn0016762	354	1064	1.13134	5.16536	1.78248	4.91083	9.35332	5.70687	0.230377	0.552248	0.31234
RpS10a-RA	RpS10a	CG12275	FBtr0085194	FBgn0027494	163	491	1.22581	1.01758	0	2.206	0.764552	0.0993299	0.555672	1.33095	0
Aos1-RA	Aos1	CG12276	FBtr0082593	FBgn0029512	337	1013	20.2011	27.6203	13.4176	9.89518	13.8325	9.21093	2.04151	1.99676	1.4567
CG12278-RA	CG12278	CG12278	FBtr0084003	FBgn0038847	229	689	0	0.362577	0.229386	0	2.21623	0.0357967	#DIV/0!	0.163601	6.40801
CG12279-RA	CG12279	CG12279	FBtr0082656	FBgn0038080	110	332	27.1931	72.9882	46.1763	20.6552	33.7247	17.6525	1.31653	2.16424	2.61585
Ptpmeg-RJ	Ptpmeg	CG1228	FBtr0306562	FBgn0261985	974	2924	3.08759	7.26208	5.13489	14.1303	22.8492	11.0046	0.218509	0.317826	0.466614
kek1-RB	kek1	CG12283	FBtr0332210	FBgn0015399	880	2642	4.10058	13.7105	0.777671	13.5514	33.3081	12.9966	0.302595	0.411628	0.0598367
Diap1-RD	Diap1	CG12284	FBtr0333617	FBgn0260635	438	1316	88.7261	163.253	127.902	69.6978	110.565	133.496	1.27301	1.47653	0.958101
kar-RA	kar	CG12286	FBtr0082666	FBgn0001296	553	1661	26.452	11.5808	76.8824	13.9815	6.66185	24.4144	1.89193	1.73838	3.14906
pdm2-RA	pdm2	CG12287	FBtr0080393	FBgn0004394	498	1496	0	3.33978	0.528231	1.22747	2.89006	0.488216	0	1.15561	1.08196
CG12288-RA	CG12288	CG12288	FBtr0080957	FBgn0032620	435	1307	2.3025	2.1025	1.20923	2.70124	3.2906	0.992239	0.852386	0.638941	1.21869
CG12289-RA	CG12289	CG12289	FBtr0076178	FBgn0036160	378	1136	0.529819	0	0.417377	2.81767	0	0.0358395	0.188034	#DIV/0!	11.6457
CG12290-RB	CG12290	CG12290	FBtr0339612	FBgn0039419	798	2396	2.7632	4.2748	3.69391	10.6771	16.0063	11.0074	0.258795	0.267069	0.335583
spict-RB	spict	CG12292	FBtr0329924	FBgn0032451	393	1181	13.76	20.7298	11.7765	10.7767	8.65091	6.70721	1.27683	2.39626	1.75581
stj-RC	stj	CG12295	FBtr0304694	FBgn0261041	1271	3815	3.47083	9.95333	1.03569	17.861	16.4259	7.75218	0.194325	0.605954	0.1336
klu-RD	klu	CG12296	FBtr0345346	FBgn0013469	803	2411	0.249637	1.13976	0.721075	0.639519	0.410606	0.755366	0.390351	2.77581	0.954604
Fadd-RA	Fadd	CG12297	FBtr0084176	FBgn0038928	239	719	4.1855	6.25407	9.89165	5.23193	2.85716	5.55416	0.799991	2.18891	1.78094
sub-RB	sub	CG12298	FBtr0340277	FBgn0003545	628	1886	0	0.264916	0.0837999	1.65272	0.0378291	0.423895	0	7.00295	0.19769
CG12299-RA	CG12299	CG12299	FBtr0080113	FBgn0032295	736	2210	1.90639	5.65193	0.929686	4.26698	15.2616	2.76111	0.446777	0.370338	0.336707
CG12301-RA	CG12301	CG12301	FBtr0075564	FBgn0036514	771	2315	5.19978	3.99273	2.59429	2.958	4.73405	3.14886	1.75787	0.843406	0.823882
Ir67b-RA	Ir67b	CG12303	FBtr0076294	FBgn0036083	574	1724	0	0	0	0.0290288	0.113731	0.00435696	0	0	0
AIMP2-RB	AIMP2	CG12304	FBtr0075566	FBgn0036515	301	905	23.2769	32.8487	26.1956	19.2067	24.2137	19.2183	1.21192	1.35661	1.36306
polo-RB	polo	CG12306	FBtr0100318	FBgn0003124	576	1730	0	1.44402	0.182713	4.69177	0.371491	1.07134	0	3.88709	0.170545
CG12307-RA	CG12307	CG12307	FBtr0080266	FBgn0032370	182	548	0	0	0.288406	11.2668	0.0295262	0.176457	0	0	1.63443
CAH13-RA	CAH13	CG12309	FBtr0088215	FBgn0033542	527	1583	0	0	0	4.81172	0.00501194	0.104834	0	0	0
CG1231-RA	CG1231	CG1231	FBtr0072546	FBgn0035134	345	1037	0.580399	8.19067	0.304815	2.01882	14.602	1.40777	0.287494	0.560926	0.216523
CG12310-RA	CG12310	CG12310	FBtr0075665	FBgn0036467	114	344	0	1.45242	2.29719	0.857258	0	0.937426	0	#DIV/0!	2.45053
tw-RA	tw	CG12311	FBtr0070139	FBgn0086368	765	2297	1.57216	1.08757	0.344028	0.731644	0.233026	0.438004	2.1488	4.66718	0.785446
ttm2-RA	ttm2	CG12313	FBtr0072507	FBgn0035124	409	1229	0	0.203267	0.128598	4.81422	0.0530808	0.0793064	0	3.82939	1.62153
zuc-RA	zuc	CG12314	FBtr0080316	FBgn0261266	253	761	0	0.328273	0.415366	0.425571	0.0612128	0.0522607	0	5.36281	7.94796
CG12316-RB	CG12316	CG12316	FBtr0075652	FBgn0036483	1188	3566	1.18147	3.22252	0.709127	3.53976	6.22919	2.83324	0.333771	0.517326	0.250288
JhI-21-RB	JhI-21	CG12317	FBtr0089656	FBgn0028425	500	1502	6.81216	21.6218	72.3942	9.34419	15.1184	43.2278	0.729026	1.43016	1.67471
tipE-RB	tipE	CG1232	FBtr0073220	FBgn0003710	452	1358	4.43206	11.9573	0.931055	8.19372	16.361	3.99156	0.54091	0.73084	0.233256
CG12320-RA	CG12320	CG12320	FBtr0083605	FBgn0038590	379	1139	3.17054	5.70255	1.52635	2.40562	5.72145	2.98279	1.31797	0.996697	0.511719
CG12321-RA	CG12321	CG12321	FBtr0083616	FBgn0038577	247	743	34.0225	27.5705	27.2274	21.2971	7.18176	12.0256	1.59751	3.83896	2.26412
Prosﾎｲ5-RB	Prosﾎｲ5	CG12323	FBtr0088224	FBgn0029134	282	848	117.11	132.862	132.14	61.8537	54.6075	80.4212	1.89334	2.43303	1.6431
RpS15Ab-RA	RpS15Ab	CG12324	FBtr0088226	FBgn0033555	130	392	227.238	204.568	198.365	39.3838	47.3104	66.5003	5.76984	4.32396	2.98291
CG12325-RA	CG12325	CG12325	FBtr0088227	FBgn0033557	949	2849	7.81655	3.06899	2.44087	1.77932	1.71784	1.80731	4.39299	1.78654	1.35056
Best3-RA	Best3	CG12327	FBtr0075618	FBgn0036492	535	1607	0	0	0.0983489	0.301513	0.0533354	0.0118054	0	0	8.33081
CG1233-RB	CG1233	CG1233	FBtr0072548	FBgn0035137	1129	3389	0.177596	1.91655	1.63223	3.63751	2.65301	3.46021	0.0488237	0.722406	0.471714
Cpr65Az-RA	Cpr65Az	CG12330	FBtr0076996	FBgn0035686	239	719	0	0.347448	0.219814	0	0.0557717	0	#DIV/0!	6.22983	#DIV/0!
CG12333-RA	CG12333	CG12333	FBtr0083655	FBgn0038617	487	1463	10.6963	21.8567	5.83357	10.873	20.328	11.1297	0.983755	1.0752	0.524144
Atg8b-RA	Atg8b	CG12334	FBtr0083533	FBgn0038539	120	362	3.32527	1.3802	1.30978	16.555	0.0329685	0.377639	0.200862	41.8641	3.46834
CG12338-RA	CG12338	CG12338	FBtr0088256	FBgn0033543	335	1007	69.3321	5.20966	11.7711	34.0009	15.4952	30.3795	2.03913	0.336211	0.387469
CG1234-RA	CG1234	CG1234	FBtr0081599	FBgn0037489	822	2468	5.60904	5.06109	3.07384	2.82337	4.28566	3.24236	1.98665	1.18094	0.948026
wde-RB	wde	CG12340	FBtr0339467	FBgn0027499	1420	4262	5.64875	13.0711	3.07787	5.09279	13.4793	4.05379	1.10916	0.969711	0.759256
CG12341-RA	CG12341	CG12341	FBtr0088251	FBgn0033550	128	386	6.23704	15.5326	6.14171	9.67017	17.2578	12.8172	0.644977	0.900032	0.479178
dgo-RA	dgo	CG12342	FBtr0088249	FBgn0086898	927	2783	0.432536	0.269294	0.39753	2.45253	1.52085	2.49821	0.176363	0.177068	0.159126
CG12343-RA	CG12343	CG12343	FBtr0088247	FBgn0033556	226	680	46.0257	52.5347	33.9335	14.6069	28.7548	20.1423	3.15095	1.82699	1.68469
CG12344-RD	CG12344	CG12344	FBtr0339478	FBgn0033558	445	1337	5.40201	3.9238	46.6929	2.71157	1.27379	11.0289	1.99221	3.08043	4.23368
ChAT-RA	ChAT	CG12345	FBtr0089367	FBgn0000303	721	2165	19.4601	70.733	2.99303	32.8594	177.289	28.3598	0.592225	0.39897	0.105538
cag-RB	cag	CG12346	FBtr0331937	FBgn0017414	225	677	3.55613	15.4982	6.53664	5.93633	13.5648	7.63842	0.599045	1.14253	0.855758
CG12347-RA	CG12347	CG12347	FBtr0083519	FBgn0038558	109	329	0	0	0	1.67953	0	0.0980315	0	#DIV/0!	0
Sh-RB	Sh	CG12348	FBtr0089658	FBgn0003380	616	1850	3.90405	19.8502	1.1106	46.7139	38.3739	26.8618	0.0835735	0.517284	0.041345
ﾎｻTry-RA	ﾎｻTry	CG12350	FBtr0088121	FBgn0043470	272	818	0.735788	3.97017	0.579633	9.6806	0.0210901	0.304598	0.0760064	188.248	1.90295
ﾎｴTry-RA	ﾎｴTry	CG12351	FBtr0088124	FBgn0010358	253	761	3.1636	64.6697	67.7046	25.3051	0.0743623	0.703648	0.125018	869.657	96.2194
san-RA	san	CG12352	FBtr0088126	FBgn0024188	184	554	44.543	87.4805	51.3509	26.8244	25.6564	18.8475	1.66054	3.4097	2.72454
CG12355-RB	CG12355	CG12355	FBtr0113333	FBgn0040805	204	614	29.4075	45.9758	281.601	34.7376	39.615	107.03	0.846562	1.16057	2.63106
Cbp20-RA	Cbp20	CG12357	FBtr0083551	FBgn0022943	154	464	32.4286	48.4556	24.8651	23.2064	48.2704	32.4308	1.3974	1.00384	0.766713
Paip2-RA	Paip2	CG12358	FBtr0082693	FBgn0038100	124	374	19.3115	48.0928	22.8196	55.4613	49.0327	39.7177	0.348197	0.980832	0.574544
Ulp1-RA	Ulp1	CG12359	FBtr0074693	FBgn0027603	1513	4541	6.22948	9.84738	4.48976	3.99873	7.67069	4.42672	1.55787	1.28377	1.01424
CG1236-RA	CG1236	CG1236	FBtr0078721	FBgn0037370	347	1043	13.2724	12.9339	14.6985	9.51731	6.45358	11.7974	1.39455	2.00414	1.24591
CG12362-RA	CG12362	CG12362	FBtr0076282	FBgn0036082	511	1535	0	0	0	4.31967	0.010584	0.0737949	0	0	0
Dlc90F-RA	Dlc90F	CG12363	FBtr0083575	FBgn0024432	111	335	64.679	124.535	52.8395	59.8992	129.005	60.2894	1.0798	0.96535	0.876431
O-fut1-RA	O-fut1	CG12366	FBtr0087520	FBgn0033901	402	1208	14.9472	20.6801	13.6067	3.08939	1.35904	3.72446	4.83824	15.2166	3.65332
Hen1-RA	Hen1	CG12367	FBtr0087984	FBgn0033686	391	1175	6.1468	2.12609	4.57326	2.73882	1.0658	1.60826	2.24432	1.99484	2.8436
Lac-RA	Lac	CG12369	FBtr0087933	FBgn0010238	359	1079	79.7665	41.906	86.5668	21.6097	10.6209	31.12	3.69124	3.9456	2.78171
Dh44-R2-RB	Dh44-R2	CG12370	FBtr0113075	FBgn0033744	476	1430	4.20891	4.19271	11.3838	3.77715	4.04958	6.18394	1.11431	1.03534	1.84086
spt4-RA	spt4	CG12372	FBtr0087840	FBgn0028683	116	350	17.1964	26.4091	19.8687	18.1252	17.5955	13.5438	0.948755	1.50089	1.467
mRpL18-RA	mRpL18	CG12373	FBtr0087852	FBgn0026741	186	560	22.5703	36.5801	10.1601	13.9544	28.8822	8.78309	1.61743	1.26653	1.15678
CG12374-RA	CG12374	CG12374	FBtr0087854	FBgn0033774	422	1268	0.474664	61.2718	19.3196	123.944	0.480002	1.53676	0.00382967	127.649	12.5716
CG12375-RA	CG12375	CG12375	FBtr0079642	FBgn0031987	292	878	35.6463	21.0551	28.9812	15.6307	14.3905	11.7845	2.28053	1.46312	2.45927
CG12376-RB	CG12376	CG12376	FBtr0339335	FBgn0033323	508	1526	0	0	0	2.08683	0.0237326	0.0709164	0	0	0
CG12379-RB	CG12379	CG12379	FBtr0273278	FBgn0030676	174	524	2.29723	9.05819	4.52424	4.85106	14.6685	5.6468	0.473552	0.617527	0.801203
CG12384-RA	CG12384	CG12384	FBtr0088155	FBgn0033624	96	290	317.541	264.46	324.268	103.125	79.3106	123.52	3.07918	3.33448	2.62523
ﾎｸTry-RA	ﾎｸTry	CG12385	FBtr0088162	FBgn0011555	262	788	0	2.21917	0.401134	8.56892	0.0191765	0.162356	0	115.723	2.47071
ﾎｷTry-RA	ﾎｷTry	CG12386	FBtr0088163	FBgn0011554	262	788	0	1.2681	0.6017	3.21771	0.0440786	0.0878087	0	28.769	6.8524
ﾎｶTry-RA	ﾎｶTry	CG12387	FBtr0088164	FBgn0011556	280	842	0	0	0	2.57949	0.0106007	0	0	0	#DIV/0!
ﾎｺTry-RC	ﾎｺTry	CG12388	FBtr0331940	FBgn0043471	263	791	0	0.947467	0.99903	7.20485	0.085711	0.160073	0	11.0542	6.2411
Fpps-RA	Fpps	CG12389	FBtr0088170	FBgn0025373	419	1259	6.6928	13.4928	12.3023	9.50432	4.00871	5.5627	0.704185	3.36587	2.21157
CG1239-RA	CG1239	CG1239	FBtr0078720	FBgn0037368	300	902	2.0018	3.32349	1.40174	5.85286	4.0404	2.80663	0.342021	0.822564	0.49944
dare-RA	dare	CG12390	FBtr0088176	FBgn0015582	466	1400	5.15892	2.85503	1.91914	5.04646	6.4378	3.90213	1.02229	0.44348	0.491818
CG12391-RA	CG12391	CG12391	FBtr0088205	FBgn0033581	587	1763	9.55898	14.8784	7.79924	7.04126	11.318	5.01643	1.35757	1.31457	1.55474
IPIP-RD	IPIP	CG12393	FBtr0343120	FBgn0031768	296	890	8.79142	20.7712	9.94451	10.3438	17.9095	10.5598	0.849924	1.15979	0.941736
CG12395-RA	CG12395	CG12395	FBtr0074260	FBgn0030722	254	764	0	0	0	1.47008	0.0100691	0.0200586	0	0	0
Nnp-1-RA	Nnp-1	CG12396	FBtr0080473	FBgn0022069	687	2063	11.0864	13.8046	6.0522	5.03165	11.0177	5.95026	2.20333	1.25295	1.01713
CG12398-RA	CG12398	CG12398	FBtr0073976	FBgn0030596	633	1901	0	0.131413	0.0831387	0.314198	0	0.015158	0	#DIV/0!	5.48481
Mad-RB	Mad	CG12399	FBtr0332372	FBgn0011648	525	1577	12.213	17.9005	15.8347	7.98556	15.8524	10.7257	1.52939	1.1292	1.47633
Non2-RA	Non2	CG1240	FBtr0072969	FBgn0035370	244	734	45.0996	65.6872	48.2322	24.1922	52.6814	43.1254	1.86422	1.24687	1.11842
ND-B14.5B-RA	ND-B14.5B	CG12400	FBtr0077617	FBgn0031505	116	350	190.88	316.195	210.879	197.633	324.357	182.977	0.96583	0.974835	1.15249
CG12402-RC	CG12402	CG12402	FBtr0346767	FBgn0038202	671	2015	2.09088	5.33105	0.235305	2.53631	8.38405	1.70297	0.824379	0.635856	0.138173
Vha68-1-RA	Vha68-1	CG12403	FBtr0080429	FBgn0265262	614	1844	194.206	595.547	63.5958	57.8405	155.476	43.1039	3.35761	3.83047	1.47541
Yip1d1-RA	Yip1d1	CG12404	FBtr0080430	FBgn0032465	264	794	42.4496	37.4409	46.578	17.957	15.9192	19.7002	2.36396	2.35193	2.36434
Prx2540-1-RA	Prx2540-1	CG12405	FBtr0088261	FBgn0033520	220	662	81.8258	31.3213	121.758	20.6882	2.8412	17.2746	3.95519	11.024	7.04839
TpnC4-RB	TpnC4	CG12408	FBtr0302019	FBgn0033027	153	461	0	4.33519	5.14251	47.8672	0.121113	0.978475	0	35.7947	5.25564
Atg2-RA	Atg2	CG1241	FBtr0072970	FBgn0044452	1906	5720	11.1536	5.89599	4.2551	4.63726	6.17828	6.66508	2.40521	0.95431	0.638418
cv-RB	cv	CG12410	FBtr0340464	FBgn0000394	257	773	51.389	18.4211	71.9695	9.16805	2.55578	10.9548	5.60522	7.20762	6.56968
mIF2-RA	mIF2	CG12413	FBtr0085293	FBgn0039588	696	2090	2.30382	2.62964	1.36117	2.67863	4.62546	2.85565	0.860074	0.568513	0.476657
nAChRﾎｱ4-RD	nAChRﾎｱ4	CG12414	FBtr0308330	FBgn0266347	371	1115	4.85818	30.0227	1.70095	6.37681	10.1087	3.97846	0.761851	2.96998	0.42754
Hsp83-RA	Hsp83	CG1242	FBtr0073040	FBgn0001233	717	2153	319.527	542.794	195.705	151.046	147.483	104.511	2.11543	3.68039	1.87258
CG12420-RA	CG12420	CG12420	FBtr0082222	FBgn0037797	240	722	0	0	0.218901	0.0779195	0.317018	0.02339	0	0	9.35876
klhl10-RB	klhl10	CG12423	FBtr0113686	FBgn0040038	767	2303	0	0.216948	0	1.53428	0	0.0467757	0	#DIV/0!	0
ckn-RF	ckn	CG12424	FBtr0345947	FBgn0033987	642	1928	12.487	14.1234	8.19744	8.22328	26.117	7.97725	1.5185	0.540773	1.0276
CG12426-RB	CG12426	CG12426	FBtr0300050	FBgn0039552	163	491	0	0	0	1.60822	0	0	0	#DIV/0!	#DIV/0!
CROT-RD	CROT	CG12428	FBtr0085239	FBgn0039543	618	1856	35.3471	5.78775	11.8365	14.6239	5.13128	8.9753	2.41707	1.12793	1.31878
raw-RB	raw	CG12437	FBtr0079745	FBgn0003209	805	2417	9.71167	7.02832	7.78136	14.1105	11.498	11.232	0.68826	0.611266	0.692783
CG12438-RA	CG12438	CG12438	FBtr0079732	FBgn0032065	241	725	0	0.344573	0	2.59282	0.0217057	0.0864797	0	15.8747	0
CG12439-RB	CG12439	CG12439	FBtr0340592	FBgn0032094	231	695	0	0	0	0.767525	0	0	0	#DIV/0!	#DIV/0!
MEP-1-RF	MEP-1	CG1244	FBtr0072935	FBgn0035357	1152	3458	11.4875	21.0949	7.9069	13.0946	29.6242	11.2026	0.877269	0.712084	0.705807
wuc-RA	wuc	CG12442	FBtr0087849	FBgn0033770	136	410	0	0	0	1.091	0.143186	0.0158466	0	0	0
ths-RB	ths	CG12443	FBtr0304622	FBgn0033652	737	2213	2.99169	13.3205	1.49976	3.43561	9.15792	2.29243	0.87079	1.45453	0.654225
Ir48c-RB	Ir48c	CG12444	FBtr0088065	FBgn0033651	561	1685	0	0	0	0.0131714	0	0	0	#DIV/0!	#DIV/0!
CG12446-RA	CG12446	CG12446	FBtr0077343	FBgn0031201	709	2129	0	0.117339	0	0.43675	0	0.0075637	0	#DIV/0!	0
CG12448-RC	CG12448	CG12448	FBtr0300613	FBgn0028857	352	1058	0	0	0	3.21169	0.00776404	0.0773334	0	0	0
Gfat1-RF	Gfat1	CG12449	FBtr0113690	FBgn0287209	434	1304	53.541	29.8859	35.9968	13.14	4.25229	8.45348	4.07466	7.02819	4.25822
MED27-RA	MED27	CG1245	FBtr0078712	FBgn0037359	293	881	2.73269	8.79033	2.87031	4.72928	2.13792	1.74986	0.577823	4.11164	1.64031
CG1246-RE	CG1246	CG1246	FBtr0345027	FBgn0035360	437	1313	0	0.761052	0.842594	4.10111	0.105188	0.163707	0	7.23514	5.14697
CG12464-RA	CG12464	CG12464	FBtr0087652	FBgn0033861	125	377	0	0	0	7.10977	0	0.0395226	0	#DIV/0!	0
CG12470-RA	CG12470	CG12470	FBtr0070069	FBgn0040371	195	587	0	0.42558	0	12.2718	0.380622	0.303294	0	1.11812	0
stnB-RH	stnB	CG12473	FBtr0344466	FBgn0016975	1241	3725	32.8001	111.73	3.73372	15.2313	60.3509	10.0297	2.15346	1.85133	0.372267
CG12477-RA	CG12477	CG12477	FBtr0075089	FBgn0036809	265	797	0	0	0.198302	0.620122	0	0.0301863	0	#DIV/0!	6.56927
CG12479-RA	CG12479	CG12479	FBtr0073869	FBgn0040871	74	224	0	0	0	4.82537	0	0.327077	0	#DIV/0!	0
CG12480-RB	CG12480	CG12480	FBtr0304579	FBgn0030537	577	1733	0	0	0	0	0	0	#DIV/0!	#DIV/0!	#DIV/0!
CG12481-RB	CG12481	CG12481	FBtr0100281	FBgn0030542	120	362	0	0	0	0	0	0.0169766	#DIV/0!	#DIV/0!	0
CG12483-RA	CG12483	CG12483	FBtr0072540	FBgn0040688	88	266	6.78806	0.939156	1.18832	1.49752	0.313716	0.690735	4.53288	2.99365	1.72037
side-VIII-RD	side-VIII	CG12484	FBtr0273284	FBgn0086604	1194	3584	13.7706	11.501	88.5925	6.32369	7.38132	7.72916	2.17761	1.55812	11.4621
BobA-RA	BobA	CG12487	FBtr0075673	FBgn0040487	78	236	0	0	0	0.247926	0	0	0	#DIV/0!	#DIV/0!
dnr1-RB	dnr1	CG12489	FBtr0330229	FBgn0260866	696	2090	35.1333	32.0337	19.5857	9.80661	16.7296	9.83317	3.58262	1.91479	1.9918
SmD2-RA	SmD2	CG1249	FBtr0081737	FBgn0261789	119	359	55.3255	75.8493	45.7851	31.3125	43.7041	27.2729	1.76688	1.73552	1.67878
CG12490-RB	CG12490	CG12490	FBtr0302717	FBgn0034782	479	1439	0	0	0	0.0134833	0	0	0	#DIV/0!	#DIV/0!
CG12491-RA	CG12491	CG12491	FBtr0072089	FBgn0034900	157	473	0	0	0	0.153152	0	0	0	#DIV/0!	#DIV/0!
CG12493-RA	CG12493	CG12493	FBtr0073363	FBgn0035571	296	890	0	0.561383	0	1.94998	0.0342333	0.0681958	0	16.3988	0
CG12496-RA	CG12496	CG12496	FBtr0070462	FBgn0040385	353	1061	0	0	0	0.0288966	0	0	0	#DIV/0!	#DIV/0!
CG12498-RA	CG12498	CG12498	FBtr0070489	FBgn0040356	261	785	0	0	0	0.735638	0	0.0207023	0	#DIV/0!	0
CG12499-RA	CG12499	CG12499	FBtr0084295	FBgn0038968	2059	6179	3.11701	1.85977	1.45795	1.28011	1.72504	1.35484	2.43496	1.0781	1.0761
Sec23-RG	Sec23	CG1250	FBtr0330314	FBgn0262125	773	2321	42.0093	40.4699	33.6385	19.8063	18.8607	16.018	2.12101	2.14572	2.10004
stnA-RF	stnA	CG12500	FBtr0344465	FBgn0016976	850	2552	22.8769	68.7188	8.91799	15.2313	60.3509	10.0297	1.50196	1.13866	0.889161
Or56a-RA	Or56a	CG12501	FBtr0086344	FBgn0034473	419	1259	0	0	0	0.0176247	0.0159348	0	0	0	#DIV/0!
CG12502-RC	CG12502	CG12502	FBtr0304699	FBgn0035171	644	1934	1.86724	13.8212	0.653761	7.53741	41.6674	5.86111	0.24773	0.331703	0.111542
Arc1-RA	Arc1	CG12505	FBtr0087560	FBgn0033926	254	764	18.1193	43.1618	278.857	48.9005	37.8015	988.471	0.370533	1.1418	0.28211
CG12506-RA	CG12506	CG12506	FBtr0078003	FBgn0031276	107	323	0	7.73422	10.7648	7.11946	0	0.382135	0	#DIV/0!	28.1701
CG12507-RB	CG12507	CG12507	FBtr0290087	FBgn0030729	304	914	0	0	0.345835	0	0.0274788	0.0182467	#DIV/0!	0	18.9533
CG12511-RB	CG12511	CG12511	FBtr0302949	FBgn0031729	131	395	0	0	0	1.936	0	0	0	#DIV/0!	#DIV/0!
CG12512-RA	CG12512	CG12512	FBtr0079077	FBgn0031703	593	1781	30.7527	6.03148	18.6355	8.15196	1.65686	7.0345	3.77243	3.64031	2.64916
CG12516-RB	CG12516	CG12516	FBtr0301672	FBgn0039577	300	902	0	0	0	2.86984	0	0.0307668	0	#DIV/0!	0
CG12517-RA	CG12517	CG12517	FBtr0080144	FBgn0032311	138	416	0	0	0	0.0798815	0	0.0539526	0	#DIV/0!	0
CG12519-RA	CG12519	CG12519	FBtr0074930	FBgn0036872	131	395	1.52373	0.632444	1.20035	0.0438009	0	0.0197223	34.7877	#DIV/0!	60.8627
Ccp84Ab-RA	Ccp84Ab	CG1252	FBtr0081692	FBgn0004782	221	665	0	19.9101	6.65459	0.505916	1.40834	0.371673	0	14.1373	17.9044
CG12520-RC	CG12520	CG12520	FBtr0343628	FBgn0036324	160	482	1.2487	0	0	0.202307	0.0562798	0.322329	6.17232	0	0
CG12521-RA	CG12521	CG12521	FBtr0076074	FBgn0040816	66	200	0	0	0	11.4464	0	0.142507	0	#DIV/0!	0
CG12522-RA	CG12522	CG12522	FBtr0076209	FBgn0036131	137	413	0	0	0.382679	0.089185	0.26206	0	0	0	#DIV/0!
CG12523-RA	CG12523	CG12523	FBtr0076266	FBgn0036102	250	752	0	0.332201	0	0.0243499	0	0.0328921	0	#DIV/0!	0
Ir67a-RB	Ir67a	CG12525	FBtr0336953	FBgn0036010	584	1754	0.343144	0	0	0	0.0114403	0	#DIV/0!	0	#DIV/0!
Or67a-RA	Or67a	CG12526	FBtr0076375	FBgn0036009	407	1223	0	0	0.129229	0.0445031	0	0.0066795	0	#DIV/0!	19.3471
Zw-RC	Zw	CG12529	FBtr0340611	FBgn0004057	502	1508	36.7191	9.11131	14.2535	11.1097	3.7206	6.34897	3.30514	2.44888	2.24502
Cdc42-RD	Cdc42	CG12530	FBtr0309215	FBgn0010341	191	575	64.8977	55.1766	107.472	29.9159	33.5715	47.1334	2.16934	1.64356	2.28016
CG12531-RB	CG12531	CG12531	FBtr0335043	FBgn0031064	811	2435	10.3814	37.7544	0.908687	5.29803	21.4275	4.13959	1.95948	1.76196	0.219511
AP-1-2ﾎｲ-RA	AP-1-2ﾎｲ	CG12532	FBtr0074789	FBgn0010380	921	2765	70.0917	144.288	56.8739	15.9192	37.6024	16.876	4.40297	3.8372	3.37011
Alr-RB	Alr	CG12534	FBtr0331763	FBgn0031068	266	800	18.0562	11.8662	10.8657	12.147	19.4513	20.2921	1.48647	0.610048	0.535465
CG12535-RD	CG12535	CG12535	FBtr0332303	FBgn0029657	205	617	0	0	0	1.38534	0.0125251	0.0810915	0	0	0
rdx-RC	rdx	CG12537	FBtr0301634	FBgn0264493	403	1211	24.3533	43.9395	21.273	26.8751	23.4958	16.4013	0.906164	1.8701	1.29703
CG12538-RA	CG12538	CG12538	FBtr0082791	FBgn0038157	194	584	0	0.855532	0.541256	0.0379608	0	0	0	#DIV/0!	#DIV/0!
CG12539-RA	CG12539	CG12539	FBtr0073987	FBgn0030586	626	1880	0.320146	0	0	0.0106509	0.00962965	0.0191831	30.0582	0	0
CG12540-RA	CG12540	CG12540	FBtr0073929	FBgn0030570	147	443	0	0	0	0	0	0.129523	#DIV/0!	#DIV/0!	0
CG12541-RE	CG12541	CG12541	FBtr0343324	FBgn0029930	263	791	4.56542	12.0012	0.399612	7.37601	28.6837	6.19959	0.618955	0.418399	0.0644578
CG12546-RA	CG12546	CG12546	FBtr0078541	FBgn0037178	117	353	0	0.707692	0	1.13533	0	0	0	#DIV/0!	#DIV/0!
CG12547-RA	CG12547	CG12547	FBtr0111273	FBgn0250830	717	2153	13.4185	19.6093	13.2134	13.2244	11.8301	9.32061	1.01467	1.65757	1.41765
nompB-RC	nompB	CG12548	FBtr0301173	FBgn0016919	840	2522	0.715949	2.1792	0.0626672	0.762617	0.603309	0.179157	0.938806	3.61208	0.349789
intr-RA	intr	CG12558	FBtr0085311	FBgn0039599	298	896	0	0	0	2.00809	0	0	0	#DIV/0!	#DIV/0!
rl-RG	rl	CG12559	FBtr0329919	FBgn0003256	331	995	61.0948	95.658	47.1757	23.5412	14.0425	16.6753	2.59523	6.81204	2.82908
CG12560-RB	CG12560	CG12560	FBtr0300761	FBgn0031974	278	836	17.2787	3.28705	19.8504	6.8942	2.39658	16.4741	2.50626	1.37155	1.20494
CG12567-RD	CG12567	CG12567	FBtr0300702	FBgn0039958	335	1007	17.333	35.2272	18.6768	14.3546	18.1718	11.7111	1.20749	1.93857	1.5948
ﾎｱ-Est3-RD	ﾎｱ-Est3	CG1257	FBtr0339708	FBgn0015571	543	1631	1.10706	1.22534	5.6203	9.93271	1.69835	5.89177	0.111456	0.721484	0.953923
CG12576-RB	CG12576	CG12576	FBtr0077366	FBgn0031190	290	872	40.0329	34.3783	24.8307	25.0654	24.814	25.9782	1.59714	1.38544	0.955831
pav-RA	pav	CG1258	FBtr0073227	FBgn0011692	887	2663	0.226014	0.18762	0	0.872495	0.131473	0.27126	0.259043	1.42706	0
CG12581-RA	CG12581	CG12581	FBtr0078962	FBgn0037213	665	1997	9.64445	5.62929	8.70562	14.1698	6.80299	11.5856	0.680633	0.827473	0.751415
ﾎｲ-Man-RD	ﾎｲ-Man	CG12582	FBtr0306022	FBgn0037215	908	2726	26.0533	5.22358	84.937	11.5671	3.33599	21.3433	2.25235	1.56582	3.97957
Mur82C-RB	Mur82C	CG12586	FBtr0303866	FBgn0037260	578	1736	0	0	0.0910407	0.373228	0	0	0	#DIV/0!	#DIV/0!
CG12589-RB	CG12589	CG12589	FBtr0339316	FBgn0040684	96	290	0	0.861432	0	3.06467	0.468909	0.0636892	0	1.8371	0
Cpr64Ad-RB	Cpr64Ad	CG1259	FBtr0073223	FBgn0035513	247	743	0	0	0	0.762574	0.104463	0.114455	0	0	0
CG12590-RA	CG12590	CG12590	FBtr0078773	FBgn0037294	333	1001	0.601273	0	0	0.172148	0.0155642	0	3.49277	0	#DIV/0!
dpr16-RB	dpr16	CG12591	FBtr0110950	FBgn0037295	443	1331	1.35659	5.25532	0	2.25682	5.11127	1.51411	0.601109	1.02818	0
CG12592-RA	CG12592	CG12592	FBtr0082233	FBgn0037811	674	2024	1.78421	2.34511	1.17129	3.53357	3.55345	1.31689	0.504932	0.659952	0.889441
CG12594-RA	CG12594	CG12594	FBtr0082429	FBgn0037941	686	2060	7.01213	20.8584	0.767217	3.37991	10.5403	2.00341	2.07465	1.97893	0.382956
Adar-RB	Adar	CG12598	FBtr0070300	FBgn0026086	628	1886	20.7433	74.0439	10.475	11.1186	27.8068	8.80894	1.86564	2.6628	1.18913
Vha100-5-RA	Vha100-5	CG12602	FBtr0080255	FBgn0032373	814	2444	0.246266	1.12437	0.388003	2.09173	0.0560624	0.0297817	0.117733	20.0558	13.0282
CG12605-RD	CG12605	CG12605	FBtr0333137	FBgn0035481	619	1859	8.09406	35.3424	1.61532	23.677	96.6736	18.9337	0.341853	0.365584	0.0853145
CG12607-RD	CG12607	CG12607	FBtr0333964	FBgn0035545	139	419	0	0.596218	0	0.335623	0	0	0	#DIV/0!	#DIV/0!
CG12608-RA	CG12608	CG12608	FBtr0074018	FBgn0030630	443	1331	12.2093	17.2675	8.78696	11.3371	15.0646	11.0697	1.07693	1.14623	0.793787
CG12609-RB	CG12609	CG12609	FBtr0074605	FBgn0030952	324	974	0	0	0	1.2619	0.00533134	0.021241	0	0	0
Andorra-RA	Andorra	CG12611	FBtr0074591	FBgn0030898	249	749	0	0	0	0.867647	0.0106007	0.0739118	0	0	0
CG12617-RA	CG12617	CG12617	FBtr0081351	FBgn0040996	96	290	0	0	0.544988	11.764	0.055979	0.278788	0	0	1.95485
Acp62F-RA	Acp62F	CG1262	FBtr0072943	FBgn0020509	115	347	0	0.719929	0.910932	64.3959	0.0628741	0.542755	0	11.4503	1.67835
CG12620-RB	CG12620	CG12620	FBtr0332225	FBgn0032626	287	863	0	0	0	3.5336	0	0.142291	0	#DIV/0!	0
beat-IIIa-RE	beat-IIIa	CG12621	FBtr0340178	FBgn0265607	343	1031	0.583777	7.51142	0.306589	2.57596	3.78852	1.43807	0.226625	1.98268	0.213194
Gr10b-RA	Gr10b	CG12622	FBtr0073550	FBgn0030297	373	1121	0	0	0.140987	0.0532544	0.192593	0.0399649	0	0	3.52778
RpL8-RA	RpL8	CG1263	FBtr0072924	FBgn0261602	256	770	286.086	188.822	208.539	804.016	1072.53	1328.35	0.355821	0.176052	0.156991
tio-RA	tio	CG12630	FBtr0089377	FBgn0028979	1024	3074	0.587385	3.65702	0.205656	1.41722	4.50261	0.647071	0.414463	0.812201	0.317826
CG12637-RA	CG12637	CG12637	FBtr0071504	FBgn0030224	292	878	0	0.569056	4.6802	3.35039	0	0.0870338	0	#DIV/0!	53.7745
lab-RB	lab	CG1264	FBtr0308035	FBgn0002522	213	641	0	0.389728	0.98625	1.17616	0.721586	1.29876	0	0.540099	0.759377
CG12640-RA	CG12640	CG12640	FBtr0071464	FBgn0030202	115	347	0	0.719929	0.455466	0.38288	0.11539	0.0287334	0	6.23911	15.8515
CG12643-RA	CG12643	CG12643	FBtr0071481	FBgn0040942	77	233	15.4989	13.9382	6.78312	4.09248	2.02531	3.50118	3.78717	6.88202	1.93738
CG12645-RC	CG12645	CG12645	FBtr0332895	FBgn0030181	202	608	0	0	0.51989	0.162243	0.0366718	0	0	0	#DIV/0!
CG1265-RB	CG1265	CG1265	FBtr0073228	FBgn0035517	221	665	11.766	34.5609	25.1924	24.8891	33.9844	24.4425	0.472736	1.01697	1.03068
btd-RA	btd	CG12653	FBtr0071379	FBgn0000233	644	1934	0.622414	1.55004	0.24516	0.249773	0.544031	0.126098	2.49192	2.84918	1.94421
CG12655-RA	CG12655	CG12655	FBtr0070036	FBgn0031080	155	467	28.3538	2.67468	3.72273	8.46849	2.1688	4.14043	3.34816	1.23326	0.899116
CG12659-RC	CG12659	CG12659	FBtr0332627	FBgn0040929	110	332	3.62575	3.00982	1.90418	3.02373	4.76176	2.723	1.1991	0.632083	0.699294
CG12661-RA	CG12661	CG12661	FBtr0071265	FBgn0030071	131	395	0	0	0	0.386583	0	0	0	#DIV/0!	#DIV/0!
CG12662-RA	CG12662	CG12662	FBtr0071264	FBgn0030074	171	515	0	0	0	0.119607	0	0	0	#DIV/0!	#DIV/0!
Ir7a-RA	Ir7a	CG12663	FBtr0071075	FBgn0029961	614	1844	0	0.406424	0	0.0120363	0	0	0	#DIV/0!	#DIV/0!
fend-RB	fend	CG12664	FBtr0071349	FBgn0030090	321	965	8.73185	39.8669	5.24092	7.50407	21.9386	7.25406	1.16362	1.8172	0.722482
Obp8a-RA	Obp8a	CG12665	FBtr0071307	FBgn0030103	163	491	9.8065	4.07031	8.36907	24.3273	5.19602	19.9984	0.403106	0.783352	0.418486
CG12672-RA	CG12672	CG12672	FBtr0074539	FBgn0030886	531	1595	0.377351	2.34936	0.198178	2.41551	4.79637	1.65484	0.15622	0.489821	0.119756
olf413-RC	olf413	CG12673	FBtr0333219	FBgn0037153	760	2282	18.4624	33.6079	48.4806	4.64985	11.659	8.2419	3.97054	2.88258	5.88221
CG12674-RA	CG12674	CG12674	FBtr0077827	FBgn0031388	314	944	0	0	0.167422	1.36631	0	0.0984336	0	#DIV/0!	1.70087
ed-RB	ed	CG12676	FBtr0334265	FBgn0000547	1332	3998	17.162	18.9955	9.25035	10.9538	10.2136	10.261	1.56676	1.85982	0.901503
CG12679-RA	CG12679	CG12679	FBtr0077332	FBgn0031103	190	572	0	0	0.276305	7.69494	0	0.065871	0	#DIV/0!	4.19464
VhaM9.7-a-RB	VhaM9.7-a	CG1268	FBtr0113136	FBgn0035521	85	257	255.27	1091.61	24.5987	50.4963	328.492	34.9866	5.05521	3.32308	0.703089
CG12680-RC	CG12680	CG12680	FBtr0343530	FBgn0029740	215	647	0	0	0	0.983857	0.0211791	0.116025	0	0	0
boil-RA	boil	CG12681	FBtr0070717	FBgn0029730	450	1352	0	0	0	2.67488	0.0818731	0.338744	0	0	0
CG12682-RA	CG12682	CG12682	FBtr0070716	FBgn0029729	237	713	0	0	0	0.903776	0.0233463	0.058135	0	0	0
CG12684-RA	CG12684	CG12684	FBtr0070697	FBgn0029717	231	695	0	0.359447	0	3.93068	0	0.0112731	0	#DIV/0!	0
CG12688-RB	CG12688	CG12688	FBtr0308918	FBgn0029707	94	284	0	0	0	0.268453	0.0134841	0.00671539	0	0	0
CG12689-RA	CG12689	CG12689	FBtr0071081	FBgn0029952	185	557	1.08056	0.448502	0	10.5693	0.0913815	0.208046	0.102236	4.90802	0
CHES-1-like-RC	CHES-1-like	CG12690	FBtr0310287	FBgn0029504	1267	3803	13.7689	18.8528	12.8415	13.1277	31.2571	23.9322	1.04884	0.603151	0.536579
CG12691-RA	CG12691	CG12691	FBtr0070646	FBgn0029701	150	452	0	0	0	2.32535	0	0	0	#DIV/0!	#DIV/0!
CG12692-RB	CG12692	CG12692	FBtr0070658	FBgn0029703	553	1661	0.362357	0.150401	0	2.10334	0.0105064	0.047092	0.172277	14.3151	0
CG12693-RB	CG12693	CG12693	FBtr0070654	FBgn0029705	425	1277	0	0	0.123764	2.35181	0.0122202	0.0426016	0	0	2.90515
Or13a-RA	Or13a	CG12697	FBtr0074133	FBgn0030715	418	1256	0	0.198898	0	0.0706669	0.0878504	0.111368	0	2.26405	0
CG12698-RA	CG12698	CG12698	FBtr0074139	FBgn0030721	580	1742	0	0	0.272181	1.11851	0.100073	0.089185	0	0	3.05187
CG12699-RB	CG12699	CG12699	FBtr0300762	FBgn0046294	145	437	0	0	1.08499	114.601	0.222796	1.87975	0	0	0.577199
SkpD-RA	SkpD	CG12700	FBtr0074796	FBgn0026174	158	476	1.26444	0	0	1.62491	0	0.0152427	0.778162	#DIV/0!	0
zld-RD	zld	CG12701	FBtr0307537	FBgn0259789	1373	4121	0.438152	0.969922	0.230109	2.20102	2.34713	1.45538	0.199067	0.413237	0.158109
CG12702-RA	CG12702	CG12702	FBtr0074809	FBgn0031070	870	2612	0.230427	0.0956414	0.302539	0.452423	0.0485306	0.238241	0.509317	1.97074	1.26989
Pmp70-RB	Pmp70	CG12703	FBtr0335155	FBgn0031069	665	1997	73.539	25.1442	28.0163	33.7827	22.8635	26.7721	2.17682	1.09975	1.04647
CG12708-RA	CG12708	CG12708	FBtr0074052	FBgn0030666	405	1217	0	0.205272	0.259732	0.308043	0.107605	0.170226	0	1.90764	1.5258
CG1271-RA	CG1271	CG1271	FBtr0072987	FBgn0035392	556	1670	9.3705	3.59016	8.13893	5.37671	8.65969	13.2872	1.74279	0.414583	0.612537
CG12713-RA	CG12713	CG12713	FBtr0075506	FBgn0036536	329	989	1.82571	0.757782	1.27844	1.93963	1.08489	1.33964	0.941267	0.69849	0.954311
CG12715-RB	CG12715	CG12715	FBtr0343602	FBgn0030443	505	1517	0	0	0	0	0	0	#DIV/0!	#DIV/0!	#DIV/0!
CG12716-RA	CG12716	CG12716	FBtr0073752	FBgn0030439	418	1256	0.958398	1.19339	0.503333	0.980444	0.627893	0.117724	0.977514	1.90062	4.27552
CG12717-RA	CG12717	CG12717	FBtr0073704	FBgn0030420	681	2045	0.882945	2.56534	0.850129	1.86819	3.75266	1.61289	0.472621	0.683607	0.527083
moon-RA	moon	CG12721	FBtr0073637	FBgn0030373	172	518	0	0	0	0.438117	0.0371353	0.135624	0	0	0
CG12723-RA	CG12723	CG12723	FBtr0073738	FBgn0030459	625	1877	0.320658	0.266186	0.168403	0.0420389	0.0332571	0.0236612	7.62763	8.00387	7.11729
CG12725-RA	CG12725	CG12725	FBtr0073788	FBgn0030483	163	491	0	0	0	0.303316	0	0	0	#DIV/0!	#DIV/0!
CG12728-RB	CG12728	CG12728	FBtr0343052	FBgn0029825	477	1433	4.2001	12.2031	3.30872	4.26555	7.13803	4.62895	0.984655	1.70959	0.714788
CG12729-RA	CG12729	CG12729	FBtr0070819	FBgn0029816	233	701	0	0	0	0.510199	0	0.0241819	0	#DIV/0!	0
CG1273-RB	CG1273	CG1273	FBtr0073231	FBgn0035522	1168	3506	0	0.0712537	0	0.0371267	0.00959055	0.00238816	0	7.42957	0
CG12730-RA	CG12730	CG12730	FBtr0070780	FBgn0029771	148	446	12.1454	15.6835	52.8003	31.208	13.2342	68.6328	0.389177	1.18507	0.769316
Girdin-RB	Girdin	CG12734	FBtr0073036	FBgn0283724	1235	3707	1.62362	3.09995	1.57748	5.23788	6.04636	3.6193	0.309976	0.512697	0.435853
mEFTu2-RA	mEFTu2	CG12736	FBtr0088981	FBgn0033184	456	1370	5.71122	11.8526	4.26841	13.2516	11.1948	10.7356	0.430984	1.05876	0.397595
Crag-RD	Crag	CG12737	FBtr0343356	FBgn0025864	1671	5015	5.04062	6.37615	3.18299	5.99822	6.68352	5.13886	0.840352	0.95401	0.619397
Jafrac2-RC	Jafrac2	CG1274	FBtr0332112	FBgn0040308	242	728	14.0548	14.0693	10.4207	14.6209	5.39329	7.61608	0.961276	2.60866	1.36824
RpL28-RA	RpL28	CG12740	FBtr0073097	FBgn0035422	144	434	327.286	212.401	208.301	1660.78	1620.74	2002.44	0.197068	0.131052	0.104024
otu-RD	otu	CG12743	FBtr0333146	FBgn0003023	811	2435	0.247176	1.23112	0	5.50375	0.280528	0.532227	0.0449105	4.38859	0
CG12744-RA	CG12744	CG12744	FBtr0088377	FBgn0033459	160	482	0	0.518289	2.95108	3.82373	0.598345	2.68191	0	0.866204	1.10037
CG12746-RB	CG12746	CG12746	FBtr0078689	FBgn0037341	363	1091	17.1018	24.9586	13.0378	15.7722	19.553	24.5462	1.08431	1.27646	0.531151
Hrb87F-RA	Hrb87F	CG12749	FBtr0082851	FBgn0004237	385	1157	33.8132	50.3086	40.4337	37.1611	58.1825	34.3331	0.909908	0.864668	1.17769
CG1275-RC	CG1275	CG1275	FBtr0072906	FBgn0035321	254	764	129.198	444.044	93.0903	49.368	100.026	54.1803	2.61704	4.43928	1.71816
ncm-RA	ncm	CG12750	FBtr0081088	FBgn0086707	1330	3992	3.0154	4.63085	3.91949	8.56581	24.3582	18.3441	0.352028	0.190115	0.213665
Nxt1-RA	Nxt1	CG12752	FBtr0072241	FBgn0028411	133	401	7.50467	28.6571	43.7486	21.87	31.2597	40.3953	0.34315	0.916745	1.08301
ema-RA	ema	CG12753	FBtr0083315	FBgn0038427	1067	3203	5.26147	7.64343	8.43771	7.07038	15.0667	6.88804	0.744156	0.507305	1.22498
Or42b-RA	Or42b	CG12754	FBtr0086051	FBgn0033043	399	1199	0	0	0.131815	0.0185059	0.100389	0	0	0	#DIV/0!
l(3)mbn-RD	l(3)mbn	CG12755	FBtr0346811	FBgn0002440	402	1208	0	0.206801	0.261667	0.042488	0.0512189	0	0	4.03759	#DIV/0!
Eaf6-RA	Eaf6	CG12756	FBtr0077126	FBgn0035624	225	677	3.55613	8.85609	6.77009	7.63368	7.58727	6.11063	0.465847	1.16723	1.10792
sano-RD	sano	CG12758	FBtr0086569	FBgn0034408	778	2336	7.21425	18.3939	1.01485	7.58227	23.3834	5.45178	0.951463	0.786622	0.186151
Dbp45A-RA	Dbp45A	CG12759	FBtr0088564	FBgn0010220	521	1565	6.15335	8.93908	5.75633	6.50255	10.3755	7.215	0.946298	0.861553	0.797828
TfIIEﾎｲ-RA	TfIIEﾎｲ	CG1276	FBtr0073234	FBgn0015829	292	878	17.8232	39.5494	23.761	10.4367	13.0343	9.8181	1.70774	3.03425	2.42012
DptA-RA	DptA	CG12763	FBtr0086620	FBgn0004240	106	320	56.4257	20.2975	3.45727	201.968	16.1715	43.1216	0.27938	1.25514	0.0801749
fsd-RA	fsd	CG12765	FBtr0087742	FBgn0033813	312	938	2.56663	4.52757	2.19041	7.88133	8.64133	10.1659	0.325659	0.523944	0.215467
CG12766-RA	CG12766	CG12766	FBtr0073172	FBgn0035476	320	962	18.7695	2.33715	15.1146	3.09866	0.261478	2.41841	6.05728	8.93821	6.24982
Dlip3-RA	Dlip3	CG12767	FBtr0086734	FBgn0040465	348	1046	6.32946	26.0324	0.453289	8.27292	44.6325	5.21373	0.765082	0.583261	0.0869413
CG12768-RB	CG12768	CG12768	FBtr0331396	FBgn0037206	429	1289	2.80159	1.93806	6.86626	3.48968	3.68776	14.2897	0.80282	0.525537	0.480505
CG12769-RB	CG12769	CG12769	FBtr0088827	FBgn0033252	702	2108	7.4235	18.0133	2.69909	4.36404	17.8576	3.96612	1.70106	1.00872	0.680536
Vps28-RA	Vps28	CG12770	FBtr0088825	FBgn0021814	210	632	75.2343	89.728	76.0224	26.7588	34.7059	29.4635	2.81157	2.58538	2.58022
Rubicon-RB	Rubicon	CG12772	FBtr0331728	FBgn0030055	827	2483	2.42398	3.62197	2.3551	3.35342	6.19239	3.94417	0.722839	0.584907	0.597111
CG12773-RC	CG12773	CG12773	FBtr0342738	FBgn0024365	712	2138	7.31933	5.95911	6.35735	6.09594	4.35441	5.6543	1.20069	1.36852	1.12434
RpL21-RA	RpL21	CG12775	FBtr0085961	FBgn0032987	159	479	510.148	414.621	352.388	1725.39	1736.17	1760.24	0.295672	0.238813	0.200194
CG12780-RA	CG12780	CG12780	FBtr0088736	FBgn0033301	100	302	0	4.96322	3.66333	5.55177	0.0929528	0.509219	0	53.395	7.19402
nahoda-RB	nahoda	CG12781	FBtr0071943	FBgn0034797	1335	4007	24.1831	8.3542	12.6216	7.26649	1.8049	4.30004	3.32803	4.62861	2.93524
CG12782-RA	CG12782	CG12782	FBtr0072048	FBgn0034838	336	1010	0.595915	0	0	0.92909	0.0247061	0.0164056	0.641397	0	0
CG12783-RB	CG12783	CG12783	FBtr0331687	FBgn0038448	465	1397	0.430833	0.178823	0	0.672542	0.0715361	0.0296889	0.640605	2.49975	0
CG12784-RA	CG12784	CG12784	FBtr0083169	FBgn0038356	101	305	0	0	0	6.30132	0	0.091526	0	#DIV/0!	0
Mat89Ba-RA	Mat89Ba	CG12785	FBtr0083275	FBgn0261286	1193	3581	3.69764	4.39497	1.98606	1.83061	3.39213	1.87502	2.0199	1.29564	1.05923
hoe1-RA	hoe1	CG12787	FBtr0077397	FBgn0041150	803	2411	61.6603	35.4363	383.547	32.2091	20.4706	82.8462	1.91437	1.73108	4.62962
Pstk-RE	Pstk	CG12788	FBtr0344071	FBgn0031041	292	878	0	1.13811	0.900038	8.97524	26.2493	14.9295	0	0.0433578	0.060286
santa-maria-RA	santa-maria	CG12789	FBtr0079464	FBgn0025697	563	1691	86.1346	19.7961	220.013	21.3292	6.62864	41.1914	4.03834	2.98645	5.34124
Rtnl2-RB	Rtnl2	CG1279	FBtr0307275	FBgn0015831	255	767	0	0.651409	0	3.93543	0.105896	0.147668	0	6.15143	0
l(2)09851-RA	l(2)09851	CG12792	FBtr0086043	FBgn0022288	456	1370	11.4224	8.57031	6.69102	5.4361	3.18944	4.67411	2.10122	2.68709	1.43151
lcs-RA	lcs	CG12794	FBtr0077220	FBgn0028583	145	437	15.1502	577.377	490.415	157.482	24.6549	161.275	0.0962025	23.4184	3.04085
CG12795-RB	CG12795	CG12795	FBtr0113019	FBgn0031535	253	761	7.11809	24.9487	12.8763	17.5046	16.9032	15.4559	0.40664	1.47598	0.833103
mAChR-C-RA	mAChR-C	CG12796	FBtr0070973	FBgn0029909	371	1115	0	0	0	0	0	0.0328381	#DIV/0!	#DIV/0!	0
Ciao1-RA	Ciao1	CG12797	FBtr0087460	FBgn0033972	335	1007	23.3099	22.8233	16.4795	20.0912	17.1491	25.3437	1.1602	1.33087	0.650242
Ubc84D-RA	Ubc84D	CG12799	FBtr0081552	FBgn0017456	153	461	0	0.541899	0.342834	11.1558	0.409751	0.941841	0	1.32251	0.364004
Cyp6d4-RA	Cyp6d4	CG12800	FBtr0084304	FBgn0039006	515	1547	8.17024	2.58374	28.0949	1.7201	0.278858	2.45173	4.74987	9.26542	11.4592
Teh1-RB	Teh1	CG12806	FBtr0330082	FBgn0037766	299	899	0.669493	9.17009	0.879013	6.57063	19.6819	6.5604	0.101892	0.465914	0.133988
Spn85F-RA	Spn85F	CG12807	FBtr0082171	FBgn0037772	640	1922	0	0	0	0.0482972	0.0523997	0	0	0	#DIV/0!
nerfin-2-RB	nerfin-2	CG12809	FBtr0330083	FBgn0041105	775	2327	0	1.39562	0.0679186	0.552009	1.0718	0.203733	0	1.30213	0.333371
CG12811-RA	CG12811	CG12811	FBtr0082204	FBgn0037779	203	611	37.4324	8.58613	40.0937	17.2869	3.06577	25.3972	2.16536	2.80064	1.57866
Fancl-RA	Fancl	CG12812	FBtr0082203	FBgn0037781	381	1145	0	0	0.276064	1.26338	0.00804399	0.192293	0	0	1.43565
Npc2d-RA	Npc2d	CG12813	FBtr0082202	FBgn0037782	173	521	0	1.91797	0	1.37744	0	0.0907644	0	#DIV/0!	0
CG12814-RB	CG12814	CG12814	FBtr0110786	FBgn0037796	408	1226	31.9101	12.4296	14.9538	13.3845	4.94938	9.90349	2.38412	2.51136	1.50996
CG12817-RB	CG12817	CG12817	FBtr0110952	FBgn0037798	171	515	3.50606	37.351	0.92066	7.50012	19.1402	3.47142	0.467468	1.95144	0.265211
CG12818-RA	CG12818	CG12818	FBtr0082230	FBgn0037809	288	866	4.17003	6.92329	4.01504	4.52572	9.48732	3.56615	0.921408	0.729742	1.12587
sle-RA	sle	CG12819	FBtr0082232	FBgn0037810	1420	4262	1.83584	3.39965	1.85414	3.60461	3.99323	1.6423	0.509304	0.851352	1.12899
Atg10-RB	Atg10	CG12821	FBtr0113331	FBgn0040780	172	518	0	1.44681	0.915328	1.40645	0.660895	1.38322	0	2.18917	0.661735
CG12822-RB	CG12822	CG12822	FBtr0088842	FBgn0033229	394	1184	11.1835	26.7961	7.20821	27.1537	84.0519	32.8584	0.411858	0.318804	0.219372
CG12824-RB	CG12824	CG12824	FBtr0113050	FBgn0033222	142	428	0	1.75104	0.738536	1.73794	0.017459	0.226069	0	100.295	3.26686
CG12825-RA	CG12825	CG12825	FBtr0088829	FBgn0033221	144	434	0	1.72683	1.09249	12.6409	0.446174	1.76054	0	3.87032	0.62054
CG12826-RA	CG12826	CG12826	FBtr0088943	FBgn0033207	130	392	0	0	0	0.464583	0.350032	0.515998	0	0	0
CG12828-RA	CG12828	CG12828	FBtr0112770	FBgn0033145	97	293	0	0	0	5.25435	0	0.066959	0	#DIV/0!	0
CG12831-RB	CG12831	CG12831	FBtr0300063	FBgn0033141	259	779	0	0	0	3.38071	0	0.057084	0	#DIV/0!	0
Tsp42Eq-RA	Tsp42Eq	CG12832	FBtr0089060	FBgn0033138	219	659	3.65326	0	0.239828	3.87644	0.0652482	0.241392	0.942425	0	0.993519
CG12836-RC	CG12836	CG12836	FBtr0347153	FBgn0033140	174	524	0	1.90699	0	0.599338	3.29402	0.369289	0	0.578925	0
Tsp42Er-RA	Tsp42Er	CG12837	FBtr0089036	FBgn0033139	211	635	2.8435	5.50774	2.98671	3.03776	0.236767	1.12019	0.936052	23.2623	2.66624
Tsp42Eo-RA	Tsp42Eo	CG12838	FBtr0089035	FBgn0033136	219	659	0.913314	0	0	1.02417	0.0451694	0.224954	0.891758	0	0
Tsp42En-RA	Tsp42En	CG12839	FBtr0089034	FBgn0033135	218	656	2.75247	4.56979	5.78219	4.23537	3.06342	3.80382	0.649878	1.49173	1.5201
Tsp42El-RA	Tsp42El	CG12840	FBtr0089032	FBgn0033134	217	653	73.7365	24.1016	32.6743	22.5416	6.99509	23.049	3.27113	3.44551	1.4176
Tsp42Ek-RB	Tsp42Ek	CG12841	FBtr0305678	FBgn0033133	215	647	1.86051	1.54445	0.488552	54.8808	81.1124	19.3667	0.0339009	0.0190409	0.0252264
Tsp42Ei-RB	Tsp42Ei	CG12843	FBtr0336872	FBgn0033130	229	689	45.4245	11.2399	8.25788	14.9216	1.8933	6.41178	3.04421	5.93665	1.28792
Tsp42Eh-RB	Tsp42Eh	CG12844	FBtr0089026	FBgn0033129	231	695	6.06204	0.359447	5.45773	12.2908	1.14304	6.53414	0.493216	0.314464	0.835263
Tsp42Ef-RA	Tsp42Ef	CG12845	FBtr0089023	FBgn0033127	220	662	40.0037	25.6608	112.447	27.12	7.37826	42.9216	1.47506	3.47789	2.61982
Tsp42Ed-RA	Tsp42Ed	CG12846	FBtr0086181	FBgn0029507	227	683	66.9728	29.6267	624.319	36.3434	10.3675	185.967	1.84278	2.85766	3.35714
Tsp42Ec-RA	Tsp42Ec	CG12847	FBtr0086179	FBgn0033124	232	698	0	0.357902	0.452856	3.37981	0.00979405	0.117064	0	36.5428	3.86845
CG12848-RA	CG12848	CG12848	FBtr0072437	FBgn0040666	120	362	34.9154	57.2781	30.9981	36.1279	62.8448	34.88	0.966437	0.911421	0.888707
CG12849-RA	CG12849	CG12849	FBtr0072376	FBgn0035068	172	518	0	0	0	0	0	0	#DIV/0!	#DIV/0!	#DIV/0!
CG12851-RB	CG12851	CG12851	FBtr0300763	FBgn0035086	1081	3245	1.11286	6.38973	0.292228	2.97982	11.1261	1.808	0.373467	0.574301	0.16163
CG12853-RA	CG12853	CG12853	FBtr0087406	FBgn0040747	54	164	0	0	0	90.6507	0.274621	1.06375	0	0	0
HPS1-RA	HPS1	CG12855	FBtr0087449	FBgn0033973	596	1790	12.441	29.7266	5.03277	5.77127	22.2995	4.22339	2.15567	1.33306	1.19164
CG12857-RA	CG12857	CG12857	FBtr0087469	FBgn0033963	440	1322	0	0	0.119551	2.01882	0.0443639	0.157816	0	0	0.757536
jef-RB	jef	CG12858	FBtr0309056	FBgn0033958	762	2288	57.6095	223.174	4.76627	21.2629	112.317	14.1418	2.70938	1.98701	0.337034
ND-B15-RA	ND-B15	CG12859	FBtr0087440	FBgn0033961	113	341	187.093	342.855	153.412	148.233	173.061	79.7212	1.26215	1.98113	1.92435
CG12860-RA	CG12860	CG12860	FBtr0087480	FBgn0033954	316	950	0	0	0.499095	44.3953	0.0597046	0.390793	0	0	1.27713
CG12861-RA	CG12861	CG12861	FBtr0087481	FBgn0033953	239	719	0	0	0	46.6528	0.0451796	0.630013	0	0	0
CG12862-RA	CG12862	CG12862	FBtr0087484	FBgn0033950	107	323	0	0	0	0	0	0	#DIV/0!	#DIV/0!	#DIV/0!
CG12863-RA	CG12863	CG12863	FBtr0087500	FBgn0033948	437	1313	0.916792	0.761052	1.56482	3.10303	2.74175	1.42543	0.29545	0.277579	1.09778
Su(var)2-HP2-RB	Su(var)2-HP2	CG12864	FBtr0087502	FBgn0026427	1633	4901	1.9649	3.92487	1.4189	3.15253	4.42549	2.57133	0.623279	0.886877	0.551817
CG12866-RB	CG12866	CG12866	FBtr0300764	FBgn0033955	856	2570	0	0.291613	0.0614967	0.261166	0	0.0356351	0	#DIV/0!	1.72573
CG12868-RB	CG12868	CG12868	FBtr0301735	FBgn0033945	167	503	17.9485	30.2957	37.705	13.1693	19.9465	25.6375	1.36291	1.51885	1.47069
CG12869-RC	CG12869	CG12869	FBtr0339978	FBgn0033943	685	2057	0	0.121446	0.0768336	0.0235078	0.23025	0.282264	0	0.527455	0.272204
Mics1-RA	Mics1	CG1287	FBtr0081554	FBgn0037506	365	1097	0.548655	0	0	5.69971	0.0351995	0.119205	0.0962601	0	0
ALiX-RA	ALiX	CG12876	FBtr0085241	FBgn0086346	836	2510	40.2848	49.9631	47.6659	19.9802	35.9346	37.1167	2.01624	1.39039	1.28422
CG12877-RC	CG12877	CG12877	FBtr0100446	FBgn0039544	991	2975	0.809243	2.51915	1.54062	3.68979	6.49594	4.46119	0.219319	0.387803	0.345339
btz-RD	btz	CG12878	FBtr0330085	FBgn0045862	806	2420	15.4199	20.7491	10.9065	6.64219	11.9573	7.67304	2.32151	1.73527	1.42141
CG1288-RB	CG1288	CG1288	FBtr0334889	FBgn0250845	187	563	0	0.443722	0.280722	44.3157	0.0222592	0.299311	0	19.9343	0.937894
CG12880-RA	CG12880	CG12880	FBtr0085217	FBgn0046258	330	992	1.21346	1.25915	0.477964	1.40699	0.726151	0.62825	0.862445	1.73401	0.760785
CG12883-RA	CG12883	CG12883	FBtr0085216	FBgn0039538	157	473	2.54492	5.28151	3.6755	4.3686	5.33831	3.93412	0.582548	0.98936	0.934264
whd-RA	whd	CG12891	FBtr0088307	FBgn0261862	780	2342	177.067	25.0669	148.059	43.8825	12.6549	47.269	4.03503	1.98081	3.13227
Caf1-105-RA	Caf1-105	CG12892	FBtr0088310	FBgn0033526	747	2243	2.41501	2.00476	0.775084	2.63155	2.0879	1.19297	0.917714	0.960181	0.649708
CG12895-RA	CG12895	CG12895	FBtr0088314	FBgn0033523	156	470	29.4534	61.6566	48.0865	20.5219	26.7309	27.1142	1.43522	2.30656	1.77348
CG12896-RA	CG12896	CG12896	FBtr0088315	FBgn0033521	220	662	74.5524	31.6986	110.06	9.92509	2.2848	7.73524	7.51151	13.8737	14.2283
CG12898-RA	CG12898	CG12898	FBtr0088321	FBgn0033516	156	470	0	0	0	0	0	0	#DIV/0!	#DIV/0!	#DIV/0!
Ir47a-RA	Ir47a	CG12900	FBtr0088323	FBgn0033515	593	1781	0	0.280534	0	0.0446822	0.0100995	0.0134128	0	27.777	0
CG12902-RC	CG12902	CG12902	FBtr0305905	FBgn0033512	64	194	0	0	0	34.7487	0.0755942	0.180709	0	0	0
Obp46a-RA	Obp46a	CG12905	FBtr0088359	FBgn0033508	198	596	0	0	0	0.111593	0	0	0	#DIV/0!	#DIV/0!
Gr47a-RB	Gr47a	CG12906	FBtr0303149	FBgn0041242	361	1085	0.554723	0	0	0.0368276	0.0832413	0	15.0627	0	#DIV/0!
Ndg-RC	Ndg	CG12908	FBtr0339459	FBgn0026403	1350	4052	9.35787	1.72627	1.7162	1.48477	0.331434	0.882406	6.30255	5.20848	1.94491
CG12909-RA	CG12909	CG12909	FBtr0088348	FBgn0033507	281	845	4.98594	4.43459	5.23705	4.97559	5.85197	5.73185	1.00208	0.757795	0.913675
Alg2-RA	Alg2	CG1291	FBtr0073023	FBgn0035401	424	1274	10.3934	10.0005	10.6688	7.21692	7.19783	7.33185	1.44015	1.38937	1.45513
CG12910-RA	CG12910	CG12910	FBtr0088337	FBgn0033502	466	1400	3.43928	7.85134	1.1289	5.51915	9.25443	4.12423	0.623154	0.848387	0.273725
CG12911-RC	CG12911	CG12911	FBtr0339451	FBgn0033501	396	1190	0	0	0.132812	0.0848137	0.0383408	0.114568	0	0	1.15925
CG12912-RB	CG12912	CG12912	FBtr0339429	FBgn0033497	112	338	7.12277	14.782	2.33797	3.19403	8.30779	3.27688	2.23003	1.77929	0.713473
CG12913-RB	CG12913	CG12913	FBtr0339450	FBgn0033500	540	1622	1.85535	4.92854	0.0974393	3.10705	9.18741	2.04899	0.59714	0.536445	0.0475549
CG12914-RA	CG12914	CG12914	FBtr0088334	FBgn0033499	255	767	0	0	0	1.57736	0.0240357	0.0319209	0	0	0
CG12917-RB	CG12917	CG12917	FBtr0290287	FBgn0033490	356	1070	0	0	0.295414	1.57983	0.175176	0.221459	0	0	1.33395
sel-RA	sel	CG12918	FBtr0088433	FBgn0263260	189	569	42.311	15.8055	48.6084	20.8685	8.60052	24.504	2.02751	1.83774	1.98369
egr-RA	egr	CG12919	FBtr0088405	FBgn0033483	415	1247	25.0982	6.41066	65.9056	7.54589	1.23285	14.7588	3.32608	5.19988	4.46552
CG12920-RA	CG12920	CG12920	FBtr0088404	FBgn0033481	372	1118	0	0	0	0.0169909	0	0.0229515	0	#DIV/0!	0
mRpL42-RB	mRpL42	CG12921	FBtr0304041	FBgn0033480	124	374	33.7951	56.7762	19.8615	29.014	45.2405	19.2811	1.16478	1.25499	1.0301
CG12923-RA	CG12923	CG12923	FBtr0088379	FBgn0033461	323	971	0	0.257276	0	2.44746	0.0488115	0.0405154	0	5.27081	0
Lsm11-RA	Lsm11	CG12924	FBtr0088485	FBgn0033450	256	770	0.781655	1.29774	0.821021	1.70663	1.43951	1.06833	0.458009	0.90152	0.768508
CG12926-RA	CG12926	CG12926	FBtr0088502	FBgn0033437	313	941	18.5487	4.77862	169.636	11.8207	2.6681	66.7653	1.56918	1.79102	2.54077
CG12929-RA	CG12929	CG12929	FBtr0088541	FBgn0033429	142	428	4.21874	13.4247	13.2936	8.87382	18.0619	17.0778	0.475415	0.743259	0.778418
Or45b-RA	Or45b	CG12931	FBtr0088519	FBgn0033422	396	1190	0	0.419858	0	0.242394	0.109577	0.310639	0	3.83164	0
CG12934-RA	CG12934	CG12934	FBtr0088213	FBgn0033541	237	713	0	0	0	0.465882	0.0819025	0.104887	0	0	0
CG12935-RB	CG12935	CG12935	FBtr0332886	FBgn0033547	231	695	8.66006	14.3779	7.95918	5.32195	9.55774	6.1542	1.62723	1.50432	1.29329
mms4-RA	mms4	CG12936	FBtr0088222	FBgn0033549	309	929	0	0	0.340251	0.526881	0.0705723	0.193306	0	0	1.76016
Lsm10-RA	Lsm10	CG12938	FBtr0088248	FBgn0033554	141	425	0	2.939	2.975	5.60289	4.30767	4.91674	0	0.682273	0.605075
CG12942-RA	CG12942	CG12942	FBtr0088236	FBgn0033569	686	2060	1.46086	2.06158	0.767217	2.13925	2.23761	1.20909	0.682883	0.921332	0.634538
polyph-RA	polyph	CG12943	FBtr0088198	FBgn0033572	460	1382	0	0.180764	0.114361	0.71821	0.240258	0	0	0.752372	#DIV/0!
Obp47a-RB	Obp47a	CG12944	FBtr0088200	FBgn0033573	160	482	0	0.518289	0	0	0.0623534	0	#DIV/0!	8.31212	#DIV/0!
CG12945-RB	CG12945	CG12945	FBtr0113214	FBgn0037755	449	1349	19.185	19.4445	20.1512	5.34954	2.901	5.66735	3.58629	6.7027	3.55567
Whamy-RC	Whamy	CG12946	FBtr0334687	FBgn0037750	514	1544	0	0.64719	0.921256	2.64254	0.339745	1.23353	0	1.90493	0.746847
CG12947-RC	CG12947	CG12947	FBtr0113213	FBgn0037753	424	1274	0	0.196087	0.620277	1.7032	0.923935	1.43352	0	0.212231	0.432697
CG12948-RA	CG12948	CG12948	FBtr0082167	FBgn0037739	252	758	11.1164	14.1716	6.46365	7.74907	9.85866	6.94715	1.43455	1.43748	0.930403
side-VII-RB	side-VII	CG12950	FBtr0331695	FBgn0037736	939	2819	5.97818	28.8896	0.953101	6.1171	13.9511	3.8561	0.97729	2.07078	0.247167
CG12951-RA	CG12951	CG12951	FBtr0082058	FBgn0037677	265	797	0	0	0	0	0	0.0466708	#DIV/0!	#DIV/0!	0
sage-RA	sage	CG12952	FBtr0081982	FBgn0037672	268	806	0	0.619889	0.392175	3.2356	2.78	1.70122	0	0.222981	0.230525
mRpL41-RA	mRpL41	CG12954	FBtr0087400	FBgn0034001	166	500	27.6862	71.4472	16.4368	17.7208	43.8399	15.8237	1.56236	1.62973	1.03875
Ir52a-RB	Ir52a	CG12960	FBtr0273302	FBgn0034023	599	1799	0	0	0	0	0	0	#DIV/0!	#DIV/0!	#DIV/0!
CG12963-RA	CG12963	CG12963	FBtr0087337	FBgn0034031	190	572	0	0	0.276305	9.10629	0.0631378	0.163509	0	0	1.68985
CG12964-RB	CG12964	CG12964	FBtr0273307	FBgn0034022	1129	3389	0	1.17942	0.0932704	0.0460608	0.0624666	0.00777745	0	18.8808	11.9924
CG12970-RC	CG12970	CG12970	FBtr0308816	FBgn0034047	378	1136	0	0	0	0.273438	0.061805	0.0967382	0	0	0
CG12971-RC	CG12971	CG12971	FBtr0331796	FBgn0037078	263	791	0.760903	0	1.79825	0	0.0932406	1.43436	#DIV/0!	0	1.2537
ebd2-RA	ebd2	CG12972	FBtr0078403	FBgn0037076	367	1103	1.09134	6.56813	1.57617	3.49837	3.86929	2.02973	0.311957	1.6975	0.776541
CG12974-RA	CG12974	CG12974	FBtr0078410	FBgn0037065	330	992	0	1.51098	1.11525	5.00506	0.146198	0.270436	0	10.3352	4.12388
CG12975-RA	CG12975	CG12975	FBtr0078309	FBgn0037061	124	374	20.9208	96.8536	12.6775	20.8258	55.6703	12.3276	1.00456	1.73977	1.02839
kune-RA	kune	CG1298	FBtr0086037	FBgn0033032	264	794	40.1755	25.7996	71.0613	20.1749	10.3704	22.102	1.99136	2.48781	3.21515
CG12983-RB	CG12983	CG12983	FBtr0114616	FBgn0037040	221	665	0	0.375662	0	2.34521	0.0119121	0.0355949	0	31.5362	0
CG12984-RA	CG12984	CG12984	FBtr0078286	FBgn0037042	195	587	0	0.85116	1.61547	0.296454	0	0.0242699	0	#DIV/0!	66.5625
CG12985-RA	CG12985	CG12985	FBtr0074494	FBgn0030881	370	1112	0	0.224654	0.142128	0.409121	0.147957	0.287376	0	1.51837	0.494572
CG12986-RA	CG12986	CG12986	FBtr0074474	FBgn0030868	125	377	0	0	0	0.0418212	0.0756226	0.0188309	0	0	0
CG1299-RB	CG1299	CG1299	FBtr0332658	FBgn0035501	442	1328	28.0996	12.7918	12.9722	12.8113	5.01658	10.2336	2.19334	2.54989	1.26761
CG12990-RA	CG12990	CG12990	FBtr0074479	FBgn0030859	663	1991	0	0	0.0793805	1.58213	0.00430854	0.0643726	0	0	1.23314
CG12991-RF	CG12991	CG12991	FBtr0335251	FBgn0030847	464	1394	13.8163	29.5693	72.6742	19.1877	15.3525	26.7539	0.720061	1.92602	2.7164
CG12992-RB	CG12992	CG12992	FBtr0300778	FBgn0030846	429	1289	0	0	0	1.84519	0.00731699	0.145761	0	0	0
p-cup-RA	p-cup	CG12993	FBtr0074437	FBgn0030840	538	1616	0	0	0	0.698782	0.0160622	0.0799937	0	0	0
CG12994-RA	CG12994	CG12994	FBtr0074438	FBgn0040877	67	203	8.89469	39.3798	0	5.07045	47.9713	4.77216	1.75422	0.820902	0
CG12995-RA	CG12995	CG12995	FBtr0074402	FBgn0030826	173	521	0	0.479492	0	0.0352493	0	0	0	#DIV/0!	#DIV/0!
CG12998-RA	CG12998	CG12998	FBtr0074394	FBgn0030829	113	341	0	29.3039	25.4914	0.145144	0	0.130709	0	#DIV/0!	195.025
CG13000-RA	CG13000	CG13000	FBtr0074416	FBgn0030807	110	332	0	0	0	0.0437147	0	0.0590505	0	#DIV/0!	0
CG13001-RA	CG13001	CG13001	FBtr0074417	FBgn0030806	335	1007	4.78152	14.8847	3.29591	2.95928	8.27395	2.0771	1.61577	1.79899	1.58678
CG13002-RA	CG13002	CG13002	FBtr0074343	FBgn0030804	212	638	0	0	0	0	0.0314207	0.0156482	#DIV/0!	0	0
CG13003-RC	CG13003	CG13003	FBtr0331739	FBgn0030798	1158	3476	3.46303	1.94045	45.0587	1.70824	0.509053	6.06343	2.02725	3.81189	7.43123
CG13004-RA	CG13004	CG13004	FBtr0074351	FBgn0030797	201	605	5.969	1.23875	9.40443	6.9078	3.0434	15.0778	0.864096	0.407029	0.623725
CG13005-RA	CG13005	CG13005	FBtr0074334	FBgn0030794	480	1442	0.417389	1.73242	0.438409	1.0627	2.09495	0.542631	0.392764	0.826953	0.807933
CG13008-RA	CG13008	CG13008	FBtr0074322	FBgn0030780	877	2633	0	0.0948786	0.240101	1.62328	0.194345	0.153526	0	0.488198	1.56391
CG13010-RA	CG13010	CG13010	FBtr0074373	FBgn0030770	134	404	0	0	0	4.1088	0.0294828	0.337712	0	0	0
sing-RA	sing	CG13011	FBtr0074318	FBgn0261245	176	530	0	0	0.298201	0.117342	0.0176819	0.189329	0	0	1.57504
CG13012-RB	CG13012	CG13012	FBtr0290216	FBgn0030769	129	389	15.4723	1.9266	17.8767	9.21002	2.95826	23.3679	1.67995	0.651261	0.765014
CG13014-RA	CG13014	CG13014	FBtr0074282	FBgn0030759	232	698	7.76056	3.93692	10.6421	3.4423	1.81232	7.70261	2.25447	2.17231	1.38162
CG13016-RA	CG13016	CG13016	FBtr0087519	FBgn0033899	443	1331	3.61758	5.6307	4.156	4.32097	4.38989	4.54879	0.837214	1.28265	0.913648
CG13018-RA	CG13018	CG13018	FBtr0087581	FBgn0040751	79	239	20.1464	50.1721	17.8546	14.4727	23.3623	10.6588	1.39203	2.14757	1.67511
CG13021-RA	CG13021	CG13021	FBtr0070570	FBgn0029669	110	332	0	0	0	1.19033	0	0	0	#DIV/0!	#DIV/0!
CG13022-RB	CG13022	CG13022	FBtr0273313	FBgn0036679	198	596	2.01971	0	0.265179	1.39017	0.805691	1.21981	1.45285	0	0.217394
CG13023-RA	CG13023	CG13023	FBtr0075307	FBgn0036677	411	1235	0	0	0	0.334593	0.0168062	0.0111598	0	0	0
CG13024-RC	CG13024	CG13024	FBtr0305913	FBgn0036665	241	725	2.49051	4.82402	9.3738	2.42259	0.651008	2.72706	1.02804	7.41008	3.43733
CG13025-RA	CG13025	CG13025	FBtr0075346	FBgn0036660	608	1826	1.64807	2.7362	1.2983	1.35573	2.45786	1.00469	1.21564	1.11325	1.29224
CG13026-RB	CG13026	CG13026	FBtr0299542	FBgn0036656	118	356	25.3599	2.80691	2.66371	14.5699	0.988807	10.6502	1.74056	2.83869	0.250108
Obp73a-RB	Obp73a	CG13027	FBtr0113177	FBgn0036681	259	779	0	0	0	0	0	0.0128195	#DIV/0!	#DIV/0!	0
[truncated: 11,798 more rows]
