# Supplementary material for: Translational regulation enhances distinction of cell types in the nervous system
Source: eLife. 2024 Jul 16;12:RP90713. doi: 10.7554/eLife.90713 (PMC11251722; doi:10.7554/eLife.90713)
Supplement: Supplementary file 2. — All the genes showing at least one read in all conditions are included. [file elife-90713-supp2.xlsx]

## Sheet: Votage-gated ion channel
Voltage-gated ion channel activity (GO:0005244), TPM > 0						Riboseq, CDS (TPM)				RNAseq (TPM)			Translational efficiency (CDS/RNA)
Transcript	Gene	CG Number	Transcript_ID	Gene_ID	Length (AA)	Length (bp)	CS (Whole heads)	nSyb-G4 (Neuron)	repo-G4 (glia)	CS (Whole heads)	nSyb-G4 (Neuron)	repo-G4 (glia)	CS (Whole heads)	nSyb-G4 (Neuron)	repo-G4 (glia)
Shawl-RD	Shawl	CG34366	FBtr0332598	FBgn0085395	835	2507	0.96031	4.38447	0.189126	2.58377	5.80484	1.28208	0.37167	0.755313	0.147515
CG16868-RA	CG16868	CG16868	FBtr0086302	FBgn0034498	1449	4349	0.830362	1.72326	1.27193	1.50651	2.15369	1.50935	0.551183	0.800144	0.842701
Elk-RB	Elk	CG5076	FBtr0340287	FBgn0011589	1283	3851	1.87548	5.12475	0.451445	3.45425	4.27256	1.95824	0.54295	1.19946	0.230536
Nmdar2-RG	Nmdar2	CG33513	FBtr0339592	FBgn0053513	1082	3248	0.926531	5.23013	0.389277	3.56296	7.22653	2.26255	0.260045	0.72374	0.172052
Ca-Ma2d-RB	Ca-Ma2d	CG42817	FBtr0332356	FBgn0261999	1215	3647	2.80556	6.0279	0.390025	2.95327	8.34148	1.90486	0.949982	0.722642	0.204753
Ca-ﾎｱ1D-RJ	Ca-ﾎｱ1D	CG4894	FBtr0332025	FBgn0001991	2059	6179	0.876658	3.15352	0.485982	10.1022	8.38278	5.26467	0.0867785	0.37619	0.0923101
eag-RA	eag	CG10952	FBtr0073955	FBgn0000535	1174	3524	1.02476	5.45851	0.448486	9.81063	8.63901	4.38381	0.104454	0.631844	0.102305
Shab-RH	Shab	CG43128	FBtr0305205	FBgn0262593	1537	4613	0.782841	4.49484	0.650962	8.23921	8.13477	4.86989	0.0950141	0.552547	0.133671
Irk1-RD	Irk1	CG44159	FBtr0336475	FBgn0265042	532	1598	3.76642	2.97027	2.96708	10.5489	3.04997	6.21659	0.357045	0.97387	0.477285
NaCP60E-RJ	NaCP60E	CG34405	FBtr0308345	FBgn0085434	2806	8420	1.78704	5.54816	0.769586	9.36445	7.73979	5.15003	0.190832	0.716835	0.149433
subdued-RE	subdued	CG16718	FBtr0334921	FBgn0038721	926	2780	5.84554	4.04377	2.44461	6.90168	4.99653	3.88097	0.846973	0.809316	0.629895
Nmdar1-RA	Nmdar1	CG2902	FBtr0078763	FBgn0010399	997	2993	3.01641	18.6965	0.897692	4.03668	9.6489	1.4819	0.74725	1.93768	0.605772
Ca-ﾎｱ1T-RF	Ca-ﾎｱ1T	CG15899	FBtr0334984	FBgn0264386	3218	9656	2.11928	5.66586	1.58767	9.77793	7.28351	5.68708	0.216741	0.777903	0.279171
cac-RC	cac	CG43368	FBtr0307317	FBgn0263111	1848	5546	0.976716	3.87381	0.398964	23.515	27.2955	17.3634	0.041536	0.141921	0.0229773
Shaw-RE	Shaw	CG2822	FBtr0332185	FBgn0003386	598	1796	0.335119	7.23296	1.05599	7.57474	21.6134	4.62749	0.0442417	0.334651	0.2282
stj-RC	stj	CG12295	FBtr0304694	FBgn0261041	1271	3815	3.47083	9.95333	1.03569	17.861	16.4259	7.75218	0.194325	0.605954	0.1336
SLO2-RL	SLO2	CG42732	FBtr0329872	FBgn0261698	1624	4874	1.72881	5.58676	2.23743	12.8015	11.6552	10.6273	0.135048	0.479338	0.210536
KCNQ-RG	KCNQ	CG33135	FBtr0310093	FBgn0033494	805	2417	2.73919	4.03095	8.23909	13.1153	5.47137	10.9513	0.208855	0.736735	0.752336
sei-RA	sei	CG3182	FBtr0072169	FBgn0003353	855	2567	9.37864	29.0981	1.47765	11.0054	14.4559	5.89423	0.852184	2.01289	0.250694
GPHR-RA	GPHR	CG8090	FBtr0087404	FBgn0033995	455	1367	8.80577	10.9648	9.36487	6.35022	9.55388	4.85355	1.38669	1.14768	1.92949
CG4587-RM	CG4587	CG4587	FBtr0344778	FBgn0028863	1260	3782	20.5293	58.5237	1.9223	7.51161	12.1097	4.49165	2.73301	4.83281	0.427972
Irk3-RA	Irk3	CG10369	FBtr0081125	FBgn0032706	442	1328	16.7691	5.45531	76.7621	8.26624	1.3326	16.3593	2.02862	4.09374	4.69225
Shal-RB	Shal	CG9262	FBtr0112853	FBgn0005564	571	1715	5.61515	27.9677	2.02742	11.5128	35.9827	8.21024	0.487733	0.777252	0.246938
Sh-RB	Sh	CG12348	FBtr0089658	FBgn0003380	616	1850	3.90405	19.8502	1.1106	46.7139	38.3739	26.8618	0.0835735	0.517284	0.041345
ClC-b-RA	ClC-b	CG8594	FBtr0087826	FBgn0033755	813	2441	16.5201	9.92712	33.474	8.41469	10.0996	8.23887	1.96325	0.982923	4.06294
CG5888-RB	CG5888	CG5888	FBtr0340234	FBgn0028523	455	1367	48.872	7.30989	195.044	10.7885	1.29047	28.6949	4.53001	5.66453	6.79715
ClC-a-RF	ClC-a	CG31116	FBtr0113391	FBgn0051116	1066	3200	14.4826	5.46471	39.561	16.958	10.2001	27.9745	0.854027	0.535753	1.41418
ClC-c-RB	ClC-c	CG5284	FBtr0075444	FBgn0036566	822	2468	28.7768	41.7034	29.7138	12.3246	16.7083	15.8138	2.3349	2.49597	1.87898
Hk-RG	Hk	CG43388	FBtr0307879	FBgn0263220	392	1178	19.4153	40.0807	2.28081	50.37	129.788	37.2653	0.385454	0.308817	0.0612047
Ih-RE	Ih	CG8585	FBtr0100372	FBgn0263397	1327	3983	10.2755	18.3771	7.53926	60.1906	140.402	76.4249	0.170716	0.130889	0.0986492
Irk2-RB	Irk2	CG4370	FBtr0084426	FBgn0039081	437	1313	25.2118	6.08842	133.972	45.1775	17.1979	200.522	0.558061	0.354021	0.66812
porin-RD	porin	CG6647	FBtr0305260	FBgn0004363	282	848	598.325	1293.27	590.811	328.009	383.868	205.958	1.82411	3.36904	2.86861

## Sheet: Ligand-gated ion channel
Ligand-gated ion channel activity (GO:0015276), TPM > 0						Riboseq, CDS (TPM)				RNAseq (TPM)			Translational efficiency (CDS/RNA)
Transcript	Gene	CG Number	Transcript_ID	Gene_ID	Length (AA)	Length (bp)	CS (Whole heads)	nSyb-G4 (Neuron)	repo-G4 (glia)	CS (Whole heads)	nSyb-G4 (Neuron)	repo-G4 (glia)	CS (Whole heads)	nSyb-G4 (Neuron)	repo-G4 (glia)
Ir56a-RA	Ir56a	CG30125	FBtr0086595	FBgn0050125	603	1811	0.332344	0.137943	0.0872704	0.0245111	0.0110805	0.0662199	13.5589	12.4492	1.31789
Ir85a-RA	Ir85a	CG11775	FBtr0081917	FBgn0037630	605	1817	0.331246	0.549951	0.0869822	0.218022	0.0703991	0.0420724	1.51933	7.81191	2.06744
clumsy-RB	clumsy	CG8681	FBtr0110895	FBgn0026255	1002	3008	0.200091	0.166101	0.26271	1.71388	0.189925	0.828763	0.116748	0.874558	0.316991
TrpA1-RI	TrpA1	CG5751	FBtr0331825	FBgn0035934	1197	3593	0.335026	1.73821	0.131962	0.532557	1.15196	0.172756	0.629089	1.50891	0.763865
Ir75b-RA	Ir75b	CG42643	FBtr0302293	FBgn0261402	605	1817	0.662492	0.412464	2.08757	0.134366	0.193268	0.48951	4.9305	2.13415	4.26461
CngA-RA	CngA	CG42701	FBtr0302924	FBgn0261612	665	1997	0.301389	0.625477	0.079142	1.14954	3.25632	0.773048	0.262182	0.192081	0.102377
Grik-RD	Grik	CG5621	FBtr0335016	FBgn0038840	906	2720	1.10639	0.826595	0.116211	2.05238	1.67204	1.2765	0.539074	0.494364	0.0910389
GluRIIA-RI	GluRIIA	CG6992	FBtr0079106	FBgn0004620	907	2723	1.10517	0.0917427	2.43774	1.39946	0.441304	2.54514	0.789709	0.20789	0.9578
ppk28-RA	ppk28	CG4805	FBtr0074335	FBgn0030795	606	1820	0.6614	1.23535	0.260516	0.283926	1.01764	1.09124	2.32948	1.21393	0.238735
ppk26-RC	ppk26	CG8546	FBtr0332797	FBgn0035785	597	1793	1.6784	9.8923	0.0881465	0.403958	1.73002	0.301556	4.15489	5.71804	0.292306
RyR-RJ	RyR	CG10844	FBtr0308083	FBgn0011286	5115	15347	1.45106	1.62778	0.51491	3.99449	1.34669	1.81948	0.363264	1.20873	0.282999
ppk-RA	ppk	CG3478	FBtr0080638	FBgn0020258	606	1820	0.3307	9.60829	0.607872	0.460016	1.21511	0.483309	0.718888	7.90736	1.25773
Ir76a-RA	Ir76a	CG42584	FBtr0301604	FBgn0260874	515	1547	0.389059	0.807419	0.30649	2.20523	10.0914	1.46911	0.176425	0.0800108	0.208623
CG42260-RB	CG42260	CG42260	FBtr0299573	FBgn0259145	974	2924	0.411679	3.0757	0.216206	2.55271	4.54266	1.36691	0.161271	0.677071	0.158172
Ir76b-RA	Ir76b	CG7385	FBtr0074869	FBgn0036937	636	1910	1.8907	3.26984	0.248241	1.20272	8.28166	0.840488	1.57202	0.394828	0.295353
Ir25a-RD	Ir25a	CG15627	FBtr0336959	FBgn0031634	929	2789	2.80544	15.9438	0.566678	0.710505	2.05357	0.493494	3.94851	7.76393	1.1483
SecCl-RA	SecCl	CG7589	FBtr0075221	FBgn0036727	509	1529	2.75547	0.980309	1.86059	6.2977	3.56767	4.56374	0.437537	0.274776	0.407689
Nmdar2-RG	Nmdar2	CG33513	FBtr0339592	FBgn0053513	1082	3248	0.926531	5.23013	0.389277	3.56296	7.22653	2.26255	0.260045	0.72374	0.172052
nAChRﾎｲ3-RA	nAChRﾎｲ3	CG11822	FBtr0078064	FBgn0031261	441	1325	42.2448	1.13124	2.98201	9.19013	1.95929	6.37026	4.59675	0.577372	0.468115
NtR-RA	NtR	CG6698	FBtr0071762	FBgn0029147	585	1757	26.7195	3.98112	2.24881	5.82403	1.08095	5.14352	4.58781	3.68299	0.437213
GluRIB-RC	GluRIB	CG43743	FBtr0334765	FBgn0264000	1095	3287	0.183107	7.2201	0.0961647	6.76781	15.7625	4.95925	0.0270557	0.458057	0.019391
Trpm-RD	Trpm	CG44240	FBtr0339076	FBgn0265194	1921	5765	1.35722	2.07999	2.7689	5.15679	3.66817	3.78456	0.263191	0.567037	0.73163
KaiR1D-RA	KaiR1D	CG3822	FBtr0083987	FBgn0038837	853	2561	4.93532	19.4117	0.246851	6.3352	8.00719	2.90523	0.779032	2.42428	0.0849679
Irk1-RD	Irk1	CG44159	FBtr0336475	FBgn0265042	532	1598	3.76642	2.97027	2.96708	10.5489	3.04997	6.21659	0.357045	0.97387	0.477285
CG8916-RC	CG8916	CG8916	FBtr0301233	FBgn0030707	510	1532	3.14295	17.611	0.515818	5.5667	7.99224	3.01751	0.564598	2.20351	0.170941
Nmdar1-RA	Nmdar1	CG2902	FBtr0078763	FBgn0010399	997	2993	3.01641	18.6965	0.897692	4.03668	9.6489	1.4819	0.74725	1.93768	0.605772
Itpr-RC	Itpr	CG1063	FBtr0344265	FBgn0010051	2828	8486	7.58903	8.18391	3.03578	3.69184	3.53856	2.81907	2.05562	2.31278	1.07687
Cngl-RD	Cngl	CG43395	FBtr0308308	FBgn0263257	1955	5867	1.12845	4.47087	0.646518	15.9549	10.0681	9.91802	0.0707274	0.444064	0.0651861
GluRIA-RA	GluRIA	CG8442	FBtr0076982	FBgn0004619	991	2975	3.8439	26.0312	0.478124	4.84942	10.118	2.50112	0.792653	2.57277	0.191164
pHCl-1-RL	pHCl-1	CG44099	FBtr0334979	FBgn0264908	747	2243	2.14668	7.68491	0.845546	7.51325	13.9946	4.00911	0.285719	0.549132	0.210906
CngB-RB	CngB	CG17922	FBtr0342961	FBgn0266346	987	2963	6.70329	18.3799	0.586741	4.6305	12.9713	3.43354	1.44764	1.41697	0.170885
nAChRﾎｱ1-RB	nAChRﾎｱ1	CG5610	FBtr0330310	FBgn0000036	597	1793	0.33568	5.4338	0.528879	17.8771	17.5983	10.4827	0.0187771	0.308769	0.0504525
nAChRﾎｱ3-RC	nAChRﾎｱ3	CG2302	FBtr0339652	FBgn0015519	795	2387	0.504293	4.60489	0.92696	6.318	13.8534	9.85359	0.0798185	0.332401	0.0940733
HisCl1-RC	HisCl1	CG14723	FBtr0082472	FBgn0037950	233	701	5.15156	8.19651	2.25459	6.20549	7.38068	4.75651	0.830162	1.11054	0.474001
ort-RA	ort	CG7411	FBtr0083784	FBgn0003011	485	1457	7.43565	36.1778	1.08474	4.00303	8.4805	3.10448	1.8575	4.266	0.349411
Ekar-RB	Ekar	CG9935	FBtr0110906	FBgn0039916	899	2699	21.1849	33.5062	2.10807	5.07721	5.44506	3.59395	4.17255	6.1535	0.586561
nAChRﾎｱ4-RD	nAChRﾎｱ4	CG12414	FBtr0308330	FBgn0266347	371	1115	4.85818	30.0227	1.70095	6.37681	10.1087	3.97846	0.761851	2.96998	0.42754
CG12344-RD	CG12344	CG12344	FBtr0339478	FBgn0033558	445	1337	5.40201	3.9238	46.6929	2.71157	1.27379	11.0289	1.99221	3.08043	4.23368
sei-RA	sei	CG3182	FBtr0072169	FBgn0003353	855	2567	9.37864	29.0981	1.47765	11.0054	14.4559	5.89423	0.852184	2.01289	0.250694
nAChRﾎｱ6-RG	nAChRﾎｱ6	CG4128	FBtr0303898	FBgn0032151	494	1484	1.21673	10.1004	0.426002	36.7574	39.2232	26.3564	0.0331016	0.25751	0.0161632
nAChRﾎｱ2-RB	nAChRﾎｱ2	CG6844	FBtr0084640	FBgn0000039	576	1730	9.04551	44.187	0.913564	10.256	20.2943	5.55368	0.881969	2.17732	0.164497
nAChRﾎｱ7-RD	nAChRﾎｱ7	CG32538	FBtr0301834	FBgn0086778	560	1682	2.14699	15.0008	0.939635	22.0945	32.3074	17.5629	0.0971734	0.464315	0.0535011
nAChRﾎｲ2-RA	nAChRﾎｲ2	CG6798	FBtr0084681	FBgn0004118	519	1559	8.87948	44.0662	1.21652	14.5074	23.7549	7.00262	0.612067	1.85504	0.173724
Irk3-RA	Irk3	CG10369	FBtr0081125	FBgn0032706	442	1328	16.7691	5.45531	76.7621	8.26624	1.3326	16.3593	2.02862	4.09374	4.69225
Lcch3-RC	Lcch3	CG17336	FBtr0074129	FBgn0010240	496	1490	3.23154	16.2632	0.954644	20.6434	47.33	12.9575	0.156541	0.343612	0.0736752
Rdl-RF	Rdl	CG10537	FBtr0333835	FBgn0004244	606	1820	5.9526	18.393	0.521033	52.6574	94.2567	33.4624	0.113044	0.195137	0.0155707
Trpml-RA	Trpml	CG8743	FBtr0074952	FBgn0262516	652	1958	11.3735	14.2897	30.7537	8.76709	7.13841	12.3052	1.2973	2.00181	2.49924
CG11155-RA	CG11155	CG11155	FBtr0089195	FBgn0039927	910	2732	11.6762	40.691	21.5203	26.5382	20.1519	18.8136	0.439977	2.01921	1.14387
nAChRﾎｲ1-RA	nAChRﾎｲ1	CG11348	FBtr0073299	FBgn0000038	521	1565	26.1517	107.907	2.01977	75.1429	55.2262	32.6113	0.348026	1.95392	0.0619346
Stim-RA	Stim	CG9126	FBtr0074159	FBgn0045073	570	1712	43.2421	17.5104	58.6213	20.3655	15.0606	27.2351	2.1233	1.16267	2.15242
Irk2-RB	Irk2	CG4370	FBtr0084426	FBgn0039081	437	1313	25.2118	6.08842	133.972	45.1775	17.1979	200.522	0.558061	0.354021	0.66812
GluClﾎｱ-RM	GluClﾎｱ	CG7535	FBtr0335421	FBgn0024963	456	1370	20.2089	42.8516	73.4859	32.0625	33.5872	26.6469	0.630298	1.27583	2.75777

## Sheet: Visual perception
Visual perception (GO:0007601), TPM > 0						Riboseq, CDS (TPM)				RNAseq (TPM)			Translational efficiency (CDS/RNA)
Transcript	Gene	CG Number	Transcript_ID	Gene_ID	Length (AA)	Length (bp)	CS (Whole heads)	nSyb-G4 (Neuron)	repo-G4 (glia)	CS (Whole heads)	nSyb-G4 (Neuron)	repo-G4 (glia)	CS (Whole heads)	nSyb-G4 (Neuron)	repo-G4 (glia)
boss-RA	boss	CG8285	FBtr0084949	FBgn0000206	896	2690	57.5025	130.851	3.64271	15.0946	16.7426	9.86646	3.80947	7.81546	0.369201
ninaE-RA	ninaE	CG4550	FBtr0083857	FBgn0002940	373	1121	26620.5	19699.1	721.29	9057.91	9126.29	4518.29	2.93892	2.1585	0.159638
Rh2-RA	Rh2	CG16740	FBtr0083697	FBgn0003248	381	1145	214.467	278.179	7.45373	124.473	310.544	116.797	1.72299	0.895778	0.063818
Rh3-RA	Rh3	CG10888	FBtr0083876	FBgn0003249	383	1151	455.981	1060.03	21.6954	349.821	1503.65	193.551	1.30347	0.704974	0.112091
Rh4-RA	Rh4	CG9668	FBtr0075338	FBgn0003250	378	1136	494.851	1549.91	21.2862	223.651	1581.74	227.417	2.2126	0.979876	0.0935998
trp-RA	trp	CG7875	FBtr0085513	FBgn0003861	1275	3827	208.698	307.455	24.2005	135.577	301.153	132.012	1.53934	1.02093	0.183321
nonA-RB	nonA	CG4211	FBtr0074233	FBgn0004227	742	2228	24.0426	59.5386	21.21	7.68489	15.9482	5.91556	3.12855	3.73326	3.58546
trpl-RD	trpl	CG18345	FBtr0301662	FBgn0005614	1124	3374	448.997	463.054	20.5639	212.567	379.695	131.279	2.11226	1.21954	0.156643
Crys-RA	Crys	CG16963	FBtr0080281	FBgn0005664	477	1433	17.2204	18.479	18.5288	9.85542	0.44712	1.48451	1.7473	41.329	12.4815
Rh5-RA	Rh5	CG5279	FBtr0080291	FBgn0014019	382	1148	238.023	525.309	9.49932	127.406	522.627	57.8945	1.86822	1.00513	0.16408
Fkbp59-RA	Fkbp59	CG4535	FBtr0079872	FBgn0029174	439	1319	45.1748	113.639	35.8271	26.8447	57.8883	30.4795	1.68282	1.96306	1.17545
CarT-RA	CarT	CG9317	FBtr0081395	FBgn0032879	674	2024	11.5974	23.6979	0.62469	6.74222	8.25235	4.09401	1.72011	2.87165	0.152586
Rh7-RA	Rh7	CG5638	FBtr0076020	FBgn0036260	483	1451	2.074	7.57538	3.48552	4.51997	4.65681	6.23269	0.458852	1.62673	0.559232
ninaG-RA	ninaG	CG6728	FBtr0082404	FBgn0037896	597	1793	7.38496	27.4477	4.84806	3.93238	5.3641	3.09733	1.87799	5.11691	1.56524
sif-RL	sif	CG34418	FBtr0330124	FBgn0085447	1270	3812	9.78914	34.8641	3.52412	86.3257	256.405	79.5525	0.113398	0.135973	0.0442993
t-RB	t	CG12120	FBtr0340327	FBgn0086367	387	1163	259.794	1016.02	42.2635	34.3039	29.7845	16.408	7.57331	34.1122	2.57579
cac-RC	cac	CG43368	FBtr0307317	FBgn0263111	1848	5546	0.976716	3.87381	0.398964	23.515	27.2955	17.3634	0.041536	0.141921	0.0229773
Fic-RA	Fic	CG9523	FBtr0079257	FBgn0263278	492	1478	3.25778	3.54947	5.45357	7.5027	6.93511	9.01389	0.434214	0.511812	0.605019
lovit-RA	lovit	CG45782	FBtr0346768	FBgn0267429	615	1847	106.232	140.665	4.27847	21.8119	15.9541	11.2548	4.87038	8.81688	0.380145

## Sheet: Neuropeptide
Neuropeptides hormone activity (GO:0005184), TPM > 0						Riboseq, CDS (TPM)				RNAseq (TPM)			Translational efficiency (CDS/RNA)
Transcript	Gene	CG Number	Transcript_ID	Gene_ID	Length (AA)	Length (bp)	CS (Whole heads)	nSyb-G4 (Neuron)	repo-G4 (glia)	CS (Whole heads)	nSyb-G4 (Neuron)	repo-G4 (glia)	CS (Whole heads)	nSyb-G4 (Neuron)	repo-G4 (glia)
CCAP-RB	CCAP	CG4910	FBtr0335007	FBgn0039007	155	467	2.57762	21.3975	0.33843	1.80394	6.32704	0.182058	1.42889	3.38191	1.85891
Nplp4-RA	Nplp4	CG15361	FBtr0077817	FBgn0040717	64	194	37.2293	3.86313	0.814673	14.7852	0.686872	6.1311	2.51801	5.62422	0.132876
CCHa1-RB	CCHa1	CG14358	FBtr0113232	FBgn0038199	182	548	7.68817	28.2638	0.576812	2.02118	2.79965	0.875077	3.80381	10.0955	0.659156
CNMa-RD	CNMa	CG13936	FBtr0332672	FBgn0035282	189	569	25.3866	11.8542	3.05538	8.91878	1.4252	1.10826	2.84642	8.31754	2.75693
Lk-RA	Lk	CG13480	FBtr0075722	FBgn0028418	160	482	2.4974	46.646	4.59057	6.84659	37.4615	1.99665	0.364766	1.24517	2.29914
Tk-RA	Tk	CG14734	FBtr0082488	FBgn0037976	289	869	42.2489	137.7	1.81872	21.822	64.6952	10.3845	1.93607	2.12845	0.175137
Dh44-RC	Dh44	CG8348	FBtr0344343	FBgn0012344	356	1070	53.4374	252.15	1.92019	10.1111	65.0963	5.63193	5.285	3.87349	0.340947
Nplp1-RC	Nplp1	CG3441	FBtr0290092	FBgn0035092	487	1463	58.4184	273.721	3.24087	16.7768	49.9673	8.8045	3.48209	5.47801	0.368093
SIFa-RB	SIFa	CG33527	FBtr0305055	FBgn0053527	72	218	52.4569	316.28	2.89994	16.8031	174.822	3.76396	3.12187	1.80915	0.770448
CCHa2-RB	CCHa2	CG14375	FBtr0303262	FBgn0038147	136	410	73.3993	42.6514	24.6707	44.0154	24.9444	44.6803	1.66758	1.70986	0.55216
Crz-RA	Crz	CG3302	FBtr0082927	FBgn0013767	154	464	47.9943	457.636	2.72494	21.4261	126.561	8.1492	2.23999	3.61594	0.334381
AstA-RA	AstA	CG13633	FBtr0084744	FBgn0015591	151	455	78.0452	200.401	7.98917	27.8692	73.0384	11.3973	2.80041	2.74378	0.700969
Proc-RB	Proc	CG7105	FBtr0343420	FBgn0045038	140	422	55.6234	278.822	4.49422	20.5233	114.489	11.2504	2.71026	2.43536	0.39947
Mip-RA	Mip	CG6456	FBtr0075241	FBgn0036713	211	635	80.5658	367.052	3.98228	32.372	220.547	10.2857	2.48875	1.66428	0.387166
Eh-RB	Eh	CG5400	FBtr0334930	FBgn0000564	97	293	18.4876	76.7351	91.16	0.761385	21.2395	27.1407	24.2815	3.61286	3.35879
sNPF-RB	sNPF	CG13968	FBtr0081327	FBgn0032840	281	845	91.8838	414.191	8.60372	26.5722	89.784	14.4492	3.45788	4.61319	0.595446
Dh31-RC	Dh31	CG13094	FBtr0079700	FBgn0032048	117	353	92.0714	501.754	5.37269	35.4799	143.436	14.8019	2.59503	3.4981	0.362972
Hug-RA	Hug	CG6371	FBtr0082639	FBgn0028374	191	575	94.2064	467.915	4.67268	33.9448	308.145	10.609	2.77528	1.51849	0.440444
NPF-RB	NPF	CG10342	FBtr0331685	FBgn0027109	102	308	66.4407	442.855	7.69708	47.0721	215.817	10.8872	1.41147	2.05199	0.706986
Capa-RA	Capa	CG15520	FBtr0085514	FBgn0039722	151	455	67.4628	652.265	6.25239	39.6532	246.163	13.1644	1.70132	2.64973	0.474946
Pdf-RA	Pdf	CG6496	FBtr0085024	FBgn0023178	102	308	134.835	971.685	7.18394	62.4737	504.485	20.4543	2.15828	1.92609	0.351219
AstC-RA	AstC	CG14919	FBtr0080234	FBgn0032336	122	368	215.89	1359.73	10.7369	63.9793	361.284	14.1503	3.37437	3.76361	0.758773
ITP-RE	ITP	CG13586	FBtr0300186	FBgn0035023	108	326	121.852	626.071	52.8438	25.4734	109.352	32.1858	4.78349	5.72528	1.64184
Dsk-RA	Dsk	CG18090	FBtr0078989	FBgn0000500	141	425	220.923	1246.14	21.1968	82.4276	513.131	31.7022	2.68021	2.4285	0.668623
Ms-RA	Ms	CG6440	FBtr0084607	FBgn0011581	100	302	388.627	2510.56	29.3067	110.675	765.258	36.6998	3.51142	3.28068	0.798551
Nplp3-RA	Nplp3	CG13061	FBtr0075369	FBgn0042201	90	272	2248.18	6938.81	6499.09	1864.82	465.615	781.425	1.20558	14.9025	8.31696

## Sheet: GPCR
G protein-coupled receptor activity (GO:0004930), TPM > 0						Riboseq, CDS (TPM)				RNAseq (TPM)			Translational efficiency (CDS/RNA)
Transcript	Gene	CG Number	Transcript_ID	Gene_ID	Length (AA)	Length (bp)	CS (Whole heads)	nSyb-G4 (Neuron)	repo-G4 (glia)	CS (Whole heads)	nSyb-G4 (Neuron)	repo-G4 (glia)	CS (Whole heads)	nSyb-G4 (Neuron)	repo-G4 (glia)
mtt-RC	mtt	CG30361	FBtr0088756	FBgn0050361	780	2342	1.54195	5.44005	0.0674836	2.40662	4.97305	1.72046	0.640711	1.09391	0.0392242
boss-RA	boss	CG8285	FBtr0084949	FBgn0000206	896	2690	57.5025	130.851	3.64271	15.0946	16.7426	9.86646	3.80947	7.81546	0.369201
mGluR-RB	mGluR	CG11144	FBtr0332858	FBgn0019985	976	2930	3.4921	14.1534	0.323645	2.99522	4.02836	1.60531	1.16589	3.51343	0.201609
Rh2-RA	Rh2	CG16740	FBtr0083697	FBgn0003248	381	1145	214.467	278.179	7.45373	124.473	310.544	116.797	1.72299	0.895778	0.063818
Octﾎｲ1R-RE	Octﾎｲ1R	CG6919	FBtr0331930	FBgn0038980	508	1526	3.1553	15.8795	0.310708	6.18711	16.9821	4.5952	0.50998	0.93507	0.0676156
ninaE-RA	ninaE	CG4550	FBtr0083857	FBgn0002940	373	1121	26620.5	19699.1	721.29	9057.91	9126.29	4518.29	2.93892	2.1585	0.159638
mAChR-B-RB	mAChR-B	CG7918	FBtr0344726	FBgn0037546	755	2267	0.796481	7.16277	0.139432	1.9011	9.98908	2.17601	0.418958	0.71706	0.0640772
5-HT2B-RF	5-HT2B	CG42796	FBtr0339322	FBgn0261929	904	2714	0.665299	2.66936	0.0582338	0.946772	2.74552	0.655246	0.702703	0.97226	0.0888732
Rh4-RA	Rh4	CG9668	FBtr0075338	FBgn0003250	378	1136	494.851	1549.91	21.2862	223.651	1581.74	227.417	2.2126	0.979876	0.0935998
AstA-R1-RD	AstA-R1	CG2872	FBtr0333798	FBgn0266429	394	1184	4.06672	17.9344	0.667427	1.87135	6.60837	2.35823	2.17315	2.71389	0.28302
AstA-R2-RA	AstA-R2	CG10001	FBtr0085316	FBgn0039595	357	1073	1.12185	4.42357	0.147294	1.24078	1.12623	0.35193	0.90415	3.92777	0.418532
AstC-R2-RE	AstC-R2	CG13702	FBtr0332867	FBgn0036789	549	1649	1.45997	4.84784	0.0958439	1.07617	5.00736	0.907559	1.35664	0.968144	0.105606
SIFaR-RC	SIFaR	CG10823	FBtr0301815	FBgn0038880	758	2276	0.793332	4.28067	0.0694405	0.949397	4.54535	0.606435	0.835616	0.941768	0.114506
DopEcR-RC	DopEcR	CG18314	FBtr0100186	FBgn0035538	322	968	31.7103	80.0029	4.08178	38.6799	70.5944	27.8017	0.819814	1.13328	0.146818
GABA-B-R2-RA	GABA-B-R2	CG6706	FBtr0084167	FBgn0027575	1220	3662	4.60199	22.1709	1.12212	15.3935	19.34	6.99416	0.298957	1.14638	0.160437
CNMaR-RA	CNMaR	CG33696	FBtr0091684	FBgn0053696	480	1442	3.33911	13.5129	0.328807	2.94014	9.62309	1.57902	1.1357	1.40422	0.208235
mthl2-RB	mthl2	CG17795	FBtr0077088	FBgn0035623	518	1556	9.67022	2.8899	1.32044	1.68053	1.03102	3.12997	5.75425	2.80294	0.42187
5-HT1A-RB	5-HT1A	CG16720	FBtr0086577	FBgn0004168	834	2504	3.36511	9.17852	0.252471	2.72113	12.9192	2.26521	1.23666	0.710458	0.111456
Rh3-RA	Rh3	CG10888	FBtr0083876	FBgn0003249	383	1151	455.981	1060.03	21.6954	349.821	1503.65	193.551	1.30347	0.704974	0.112091
TkR99D-RC	TkR99D	CG7887	FBtr0330298	FBgn0004622	564	1694	1.42119	4.71906	0.186596	3.12287	6.38237	1.57626	0.455091	0.73939	0.118378
Rh5-RA	Rh5	CG5279	FBtr0080291	FBgn0014019	382	1148	238.023	525.309	9.49932	127.406	522.627	57.8945	1.86822	1.00513	0.16408
MsR1-RB	MsR1	CG8985	FBtr0330187	FBgn0035331	556	1670	4.32484	8.37704	0.567832	2.2182	4.84949	1.93833	1.94971	1.72741	0.292948
CG13995-RA	CG13995	CG13995	FBtr0079187	FBgn0031770	545	1637	0.367669	8.54592	0.386186	12.2241	43.5871	11.3871	0.0300775	0.196065	0.0339144
FMRFaR-RA	FMRFaR	CG2114	FBtr0072980	FBgn0035385	549	1649	0.729987	3.33289	0.191688	1.3063	2.41728	0.788833	0.558821	1.37878	0.243002
Lgr1-RA	Lgr1	CG7665	FBtr0083509	FBgn0016650	831	2495	3.13602	5.90746	0.760144	4.95995	5.13411	3.55302	0.632268	1.15063	0.213943
CG13579-RB	CG13579	CG13579	FBtr0330230	FBgn0035010	716	2150	1.11977	4.64773	0.29404	3.32659	6.52192	2.1958	0.336611	0.712632	0.13391
Dop2R-RB	Dop2R	CG33517	FBtr0070034	FBgn0053517	466	1400	2.57946	5.35319	0.225781	3.3522	9.56909	2.11041	0.769483	0.559425	0.106984
mthl9-RA	mthl9	CG17084	FBtr0072574	FBgn0035131	513	1541	0.781148	0.486338	0.307683	0.385214	0.178846	0.54848	2.02783	2.71931	0.560974
AstC-R1-RA	AstC-R1	CG7285	FBtr0089578	FBgn0036790	483	1451	2.4888	4.13203	0.326768	1.39557	2.73726	1.01297	1.78336	1.50955	0.322584
CG31760-RD	CG31760	CG31760	FBtr0331997	FBgn0051760	875	2627	4.58222	14.0741	0.601624	7.68908	19.9612	3.45572	0.595938	0.705075	0.174095
GABA-B-R1-RC	GABA-B-R1	CG15274	FBtr0304732	FBgn0260446	841	2525	1.66856	9.30006	0.625927	5.33725	16.3928	4.16486	0.312626	0.567324	0.150288
5-HT1B-RD	5-HT1B	CG15113	FBtr0330055	FBgn0263116	562	1688	1.42624	4.43985	0.280889	2.70327	6.82781	1.61344	0.527599	0.65026	0.174092
TrissinR-RC	TrissinR	CG34381	FBtr0330221	FBgn0085410	664	1994	2.1129	5.26191	0.396305	3.44443	7.83542	1.94933	0.613426	0.671554	0.203303
Lgr3-RA	Lgr3	CG31096	FBtr0084899	FBgn0039354	765	2297	0.262026	0.978815	0.0688057	0.605983	1.51335	0.34939	0.432399	0.646786	0.196931
Octﾎｲ3R-RJ	Octﾎｲ3R	CG42244	FBtr0301944	FBgn0250910	445	1337	0.900335	5.23174	0.47284	5.38225	9.33553	2.72061	0.167279	0.560412	0.173799
Rh7-RA	Rh7	CG5638	FBtr0076020	FBgn0036260	483	1451	2.074	7.57538	3.48552	4.51997	4.65681	6.23269	0.458852	1.62673	0.559232
mAChR-A-RA	mAChR-A	CG4356	FBtr0072367	FBgn0000037	788	2366	1.01754	7.49657	0.467594	6.46776	25.4394	4.47637	0.157325	0.294684	0.104458
AkhR-RA	AkhR	CG11325	FBtr0079308	FBgn0025595	443	1331	99.9355	4.12918	5.8184	32.1243	5.59035	21.633	3.11091	0.738626	0.26896
CCKLR-17D3-RB	CCKLR-17D3	CG32540	FBtr0113003	FBgn0030954	584	1754	1.02943	2.7061	0.270319	2.68875	6.1584	1.61422	0.382866	0.439416	0.167461
RYa-R-RA	RYa-R	CG5811	FBtr0085100	FBgn0004842	464	1394	1.29528	1.07525	0.113376	0.253192	0.562751	0.152007	5.1158	1.9107	0.745863
rk-RA	rk	CG8930	FBtr0080610	FBgn0003255	1360	4082	0.294892	0.183598	0.0774359	0.338095	0.454789	0.482695	0.872216	0.403699	0.160424
GABA-B-R3-RA	GABA-B-R3	CG3022	FBtr0078001	FBgn0031275	1305	3917	0.614628	5.0384	0.484187	4.95251	12.0628	2.8922	0.124104	0.417679	0.167411
stan-RA	stan	CG11895	FBtr0088214	FBgn0024836	3579	10739	0.89673	3.72199	0.559249	1.04016	1.93169	0.695412	0.862108	1.92681	0.804198
Octﾎｲ2R-RD	Octﾎｲ2R	CG33976	FBtr0304845	FBgn0038063	536	1610	5.60752	18.7749	6.77343	22.8451	35.2918	29.8801	0.245459	0.531991	0.226687
Oamb-RC	Oamb	CG3856	FBtr0083934	FBgn0024944	645	1937	1.55362	5.80366	0.734342	2.83031	7.26946	2.14308	0.548923	0.798362	0.342658
Octﾎｱ2R-RC	Octﾎｱ2R	CG18208	FBtr0332809	FBgn0038653	670	2012	3.58971	6.3323	2.90642	5.62204	7.85591	8.19015	0.638506	0.806056	0.354868
CG7497-RC	CG7497	CG7497	FBtr0345385	FBgn0036742	412	1238	11.668	4.03579	9.31939	7.32516	0.9532	4.95021	1.59287	4.23394	1.88262
5-HT2A-RH	5-HT2A	CG1056	FBtr0339397	FBgn0087012	917	2753	2.6235	5.44458	2.12413	8.85147	7.56666	6.59736	0.296391	0.719549	0.321966
CG32547-RD	CG32547	CG32547	FBtr0332378	FBgn0052547	1008	3026	1.79011	7.09984	0.574525	2.63375	7.50611	1.35	0.679681	0.945875	0.425573
Oct-TyrR-RB	Oct-TyrR	CG7485	FBtr0301930	FBgn0004514	601	1805	0.666897	5.67448	0.525363	2.08474	8.50917	1.69783	0.319894	0.666866	0.309433
CG32447-RB	CG32447	CG32447	FBtr0078461	FBgn0052447	658	1976	0.609184	0.25285	0.719848	0.200599	0.043662	0.267627	3.03683	5.79107	2.68974
MsR2-RA	MsR2	CG43745	FBtr0330358	FBgn0264002	488	1466	0.821111	2.38569	0.53904	1.68781	2.69951	1.28462	0.486496	0.883749	0.41961
CG44153-RB	CG44153	CG44153	FBtr0335510	FBgn0265002	1946	5840	0.618364	2.78048	0.324753	1.49789	3.08488	0.755174	0.412823	0.901325	0.430038
mthl5-RA	mthl5	CG6965	FBtr0082515	FBgn0037960	496	1490	2.42365	1.67661	1.59107	3.38404	1.6225	3.20139	0.716201	1.03335	0.496995
CrzR-RA	CrzR	CG10698	FBtr0075989	FBgn0036278	579	1739	5.19155	4.16598	2.99916	3.09994	3.02593	4.30788	1.67473	1.37676	0.696204
mthl8-RA	mthl8	CG32475	FBtr0072462	FBgn0052475	492	1478	0.407222	0.845113	0.427731	9.08062	10.4337	10.0744	0.0448452	0.0809982	0.0424572
smog-RF	smog	CG31660	FBtr0336831	FBgn0051660	926	2780	2.81452	9.52534	1.93294	11.0602	18.4295	6.74479	0.254472	0.516854	0.286583
cry-RA	cry	CG3772	FBtr0083736	FBgn0025680	542	1628	105.365	83.1695	121.544	29.9491	15.7308	40.5928	3.51814	5.28705	2.99424
mthl14-RA	mthl14	CG32476	FBtr0072501	FBgn0052476	533	1601	0.751873	1.56037	0.78974	1.3594	0.230448	0.205627	0.553092	6.77102	3.84064
TyrR-RB	TyrR	CG7431	FBtr0344474	FBgn0038542	631	1895	0.317612	2.37292	0.250206	1.53936	4.4882	0.76756	0.206327	0.528701	0.325976
CCHa2-R-RB	CCHa2-R	CG14593	FBtr0301687	FBgn0033058	477	1433	0.84002	4.0096	0.441163	0.723881	2.42519	0.394753	1.16044	1.65331	1.11757
Pdfr-RA	Pdfr	CG13758	FBtr0070436	FBgn0260753	669	2009	5.69219	7.46089	5.50685	24.3896	19.412	21.0946	0.233386	0.384344	0.261056
Cirl-RB	Cirl	CG8639	FBtr0290112	FBgn0033313	1643	4931	3.66178	8.76456	4.35902	29.9283	22.7177	16.3892	0.122352	0.385803	0.265969
CCKLR-17D1-RA	CCKLR-17D1	CG42301	FBtr0299681	FBgn0259231	673	2021	0.29781	1.97776	0.234607	0.361769	2.66698	0.44796	0.823205	0.741572	0.523723
Dop1R2-RC	Dop1R2	CG18741	FBtr0330293	FBgn0266137	807	2423	0.993602	3.29925	0.456594	3.13302	10.403	2.0299	0.317139	0.317143	0.224934
PK1-R-RE	PK1-R	CG9918	FBtr0305681	FBgn0038201	430	1292	0.931694	0.773422	0.733963	1.15809	0.287739	0.378155	0.804508	2.68793	1.9409
hec-RA	hec	CG4395	FBtr0073753	FBgn0030437	486	1460	1.64897	4.61987	1.29901	1.02638	2.20104	0.844089	1.60659	2.09895	1.53895
Dh31-R-RA	Dh31-R	CG32843	FBtr0087755	FBgn0052843	443	1331	2.26099	6.19377	3.68103	5.65197	5.88392	4.50255	0.400035	1.05266	0.817542
mthl1-RB	mthl1	CG4521	FBtr0340150	FBgn0030766	676	2030	2.07543	3.19961	5.21632	2.84852	2.15275	4.44388	0.7286	1.48629	1.17382
CG15556-RC	CG15556	CG15556	FBtr0309195	FBgn0039821	755	2267	6.63734	1.32236	1.88234	3.51282	0.749299	1.34849	1.88946	1.76479	1.39588
Dop1R1-RD	Dop1R1	CG9652	FBtr0308191	FBgn0011582	511	1535	2.7447	8.62555	4.42736	2.09949	2.06499	1.33048	1.30732	4.17704	3.32764
mthl10-RG	mthl10	CG17061	FBtr0333904	FBgn0035132	575	1727	4.1821	3.03771	7.04666	5.41916	1.99819	5.68028	0.771725	1.52023	1.24055
mth-RA	mth	CG6936	FBtr0072570	FBgn0023000	514	1544	3.89815	1.13258	5.01573	1.95314	0.882934	4.44296	1.99584	1.28275	1.12891
SPR-RB	SPR	CG16752	FBtr0339781	FBgn0029768	435	1307	11.973	14.7175	7.49724	11.3648	13.7949	7.72355	1.05351	1.06688	0.970699
CG15744-RA	CG15744	CG15744	FBtr0073756	FBgn0030466	1797	5393	0.892823	1.48231	0.615424	1.11372	2.12611	0.871996	0.801656	0.697192	0.705764
CCAP-R-RC	CCAP-R	CG33344	FBtr0304043	FBgn0039396	494	1484	0.405576	2.18841	0.639003	0.520594	0.981701	0.271245	0.779063	2.2292	2.35582
CG13229-RC	CG13229	CG13229	FBtr0330603	FBgn0033579	414	1244	3.38675	4.21714	5.71712	1.82472	2.65323	3.31189	1.85604	1.58944	1.72624
CG12290-RB	CG12290	CG12290	FBtr0339612	FBgn0039419	798	2396	2.7632	4.2748	3.69391	10.6771	16.0063	11.0074	0.258795	0.267069	0.335583
Lkr-RA	Lkr	CG10626	FBtr0077149	FBgn0035610	542	1628	1.47881	1.22759	1.65036	0.970138	0.702381	0.68254	1.52433	1.74776	2.41797
CG43795-RA	CG43795	CG43795	FBtr0331989	FBgn0264339	1420	4262	4.23656	4.22025	20.173	4.5726	6.57616	22.1745	0.926511	0.64175	0.909741
sNPF-R-RB	sNPF-R	CG7395	FBtr0332667	FBgn0036934	600	1802	4.00804	7.48614	13.5068	2.66038	6.23128	7.80231	1.50657	1.20138	1.73112
mthl3-RA	mthl3	CG6530	FBtr0086955	FBgn0028956	511	1535	0.784201	0.325492	1.02962	0.704809	0.0505738	0.100748	1.11264	6.43598	10.2198
Dh44-R2-RB	Dh44-R2	CG12370	FBtr0113075	FBgn0033744	476	1430	4.20891	4.19271	11.3838	3.77715	4.04958	6.18394	1.11431	1.03534	1.84086
Tre1-RB	Tre1	CG3171	FBtr0308339	FBgn0046687	392	1178	2.55464	1.06034	4.42745	3.61476	1.46666	2.78164	0.706726	0.722961	1.59167
AdoR-RB	AdoR	CG9753	FBtr0334658	FBgn0039747	772	2318	1.29826	0.646632	9.81825	1.95518	1.09199	6.67087	0.664011	0.592158	1.47181
moody-RC	moody	CG4322	FBtr0303044	FBgn0025631	633	1901	15.5139	4.07379	124.292	12.8376	4.71374	52.5239	1.20847	0.864237	2.36639
Proc-R-RC	Proc-R	CG6986	FBtr0100551	FBgn0029723	545	1637	5.14737	1.06824	33.9844	6.32469	1.09707	11.4437	0.813853	0.973724	2.9697

## Sheet: Neuroactive ligand receptor
Neuroactive ligand receptor interaction (dme04080), TPM > 1 in RNAseq						Riboseq, CDS (TPM)				RNAseq (TPM)			Translational efficiency (CDS/RNA)
Transcript	Gene	CG Number	Transcript_ID	Gene_ID	Length (AA)	Length (bp)	CS (Whole heads)	nSyb-G4 (Neuron)	repo-G4 (glia)	CS (Whole heads)	nSyb-G4 (Neuron)	repo-G4 (glia)	CS (Whole heads)	nSyb-G4 (Neuron)	repo-G4 (glia)
mAChR-A-RA	mAChR-A	CG4356	FBtr0072367	FBgn0000037	788	2366	1.01754	7.49657	0.467594	6.46776	25.4394	4.47637	0.157325	0.294684	0.104458
mAChR-B-RB	mAChR-B	CG7918	FBtr0344726	FBgn0037546	755	2267	0.796481	7.16277	0.139432	1.9011	9.98908	2.17601	0.418958	0.71706	0.0640772
Dop1R1-RD	Dop1R1	CG9652	FBtr0308191	FBgn0011582	511	1535	2.7447	8.62555	4.42736	2.09949	2.06499	1.33048	1.30732	4.17704	3.32764
Dop2R-RB	Dop2R	CG33517	FBtr0070034	FBgn0053517	466	1400	2.57946	5.35319	0.225781	3.3522	9.56909	2.11041	0.769483	0.559425	0.106984
Dop1R2-RC	Dop1R2	CG18741	FBtr0330293	FBgn0266137	807	2423	0.993602	3.29925	0.456594	3.13302	10.403	2.0299	0.317139	0.317143	0.224934
5-HT1B-RD	5-HT1B	CG15113	FBtr0330055	FBgn0263116	562	1688	1.42624	4.43985	0.280889	2.70327	6.82781	1.61344	0.527599	0.65026	0.174092
5-HT1A-RB	5-HT1A	CG16720	FBtr0086577	FBgn0004168	834	2504	3.36511	9.17852	0.252471	2.72113	12.9192	2.26521	1.23666	0.710458	0.111456
5-HT2A-RH	5-HT2A	CG1056	FBtr0339397	FBgn0087012	917	2753	2.6235	5.44458	2.12413	8.85147	7.56666	6.59736	0.296391	0.719549	0.321966
CCKLR-17D3-RB	CCKLR-17D3	CG32540	FBtr0113003	FBgn0030954	584	1754	1.02943	2.7061	0.270319	2.68875	6.1584	1.61422	0.382866	0.439416	0.167461
TkR99D-RC	TkR99D	CG7887	FBtr0330298	FBgn0004622	564	1694	1.42119	4.71906	0.186596	3.12287	6.38237	1.57626	0.455091	0.73939	0.118378
ﾎｱTry-RA	ﾎｱTry	CG18444	FBtr0088161	FBgn0003863	256	770	7.03489	124.583	120.895	444.115	1.87938	6.75528	0.0158402	66.2897	17.8964
ﾎｲTry-RA	ﾎｲTry	CG18211	FBtr0088122	FBgn0010357	253	761	11.0726	144.112	166.977	357.853	1.98802	6.60465	0.0309417	72.4899	25.2817
baz-RA	baz	CG5055	FBtr0074388	FBgn0000163	1464	4394	5.06813	4.77572	2.302	2.59762	1.75672	1.87719	1.95107	2.71854	1.2263
Gpb5-RA	Gpb5	CG40041	FBtr0113777	FBgn0063368	169	509	15.372	50.552	0.310504	6.69254	27.458	3.75922	2.29689	1.84107	0.0825981
Lgr1-RA	Lgr1	CG7665	FBtr0083509	FBgn0016650	831	2495	3.13602	5.90746	0.760144	4.95995	5.13411	3.55302	0.632268	1.15063	0.213943
AdoR-RB	AdoR	CG9753	FBtr0334658	FBgn0039747	772	2318	1.29826	0.646632	9.81825	1.95518	1.09199	6.67087	0.664011	0.592158	1.47181
AkhR-RA	AkhR	CG11325	FBtr0079308	FBgn0025595	443	1331	99.9355	4.12918	5.8184	32.1243	5.59035	21.633	3.11091	0.738626	0.26896
CrzR-RA	CrzR	CG10698	FBtr0075989	FBgn0036278	579	1739	5.19155	4.16598	2.99916	3.09994	3.02593	4.30788	1.67473	1.37676	0.696204
Dh31-R-RA	Dh31-R	CG32843	FBtr0087755	FBgn0052843	443	1331	2.26099	6.19377	3.68103	5.65197	5.88392	4.50255	0.400035	1.05266	0.817542
Dh44-R2-RB	Dh44-R2	CG12370	FBtr0113075	FBgn0033744	476	1430	4.20891	4.19271	11.3838	3.77715	4.04958	6.18394	1.11431	1.03534	1.84086
mGluR-RB	mGluR	CG11144	FBtr0332858	FBgn0019985	976	2930	3.4921	14.1534	0.323645	2.99522	4.02836	1.60531	1.16589	3.51343	0.201609
GABA-B-R1-RC	GABA-B-R1	CG15274	FBtr0304732	FBgn0260446	841	2525	1.66856	9.30006	0.625927	5.33725	16.3928	4.16486	0.312626	0.567324	0.150288
GABA-B-R3-RA	GABA-B-R3	CG3022	FBtr0078001	FBgn0031275	1305	3917	0.614628	5.0384	0.484187	4.95251	12.0628	2.8922	0.124104	0.417679	0.167411
GABA-B-R2-RA	GABA-B-R2	CG6706	FBtr0084167	FBgn0027575	1220	3662	4.60199	22.1709	1.12212	15.3935	19.34	6.99416	0.298957	1.14638	0.160437
Nmdar1-RA	Nmdar1	CG2902	FBtr0078763	FBgn0010399	997	2993	3.01641	18.6965	0.897692	4.03668	9.6489	1.4819	0.74725	1.93768	0.605772
Nmdar2-RG	Nmdar2	CG33513	FBtr0339592	FBgn0053513	1082	3248	0.926531	5.23013	0.389277	3.56296	7.22653	2.26255	0.260045	0.72374	0.172052
CG8916-RC	CG8916	CG8916	FBtr0301233	FBgn0030707	510	1532	3.14295	17.611	0.515818	5.5667	7.99224	3.01751	0.564598	2.20351	0.170941
Lcch3-RC	Lcch3	CG17336	FBtr0074129	FBgn0010240	496	1490	3.23154	16.2632	0.954644	20.6434	47.33	12.9575	0.156541	0.343612	0.0736752
Rdl-RF	Rdl	CG10537	FBtr0333835	FBgn0004244	606	1820	5.9526	18.393	0.521033	52.6574	94.2567	33.4624	0.113044	0.195137	0.0155707
Tspo-RA	Tspo	CG2789	FBtr0078066	FBgn0031263	185	557	155.601	109.434	126.267	99.2679	84.5834	135.195	1.56749	1.29381	0.933966
MSBP-RB	MSBP	CG9066	FBtr0301598	FBgn0030703	248	746	167.008	100.462	175.843	75.9419	30.3995	72.2901	2.19915	3.30472	2.43246

## Sheet: Fatty acid metabolism
Fatty acid metabolism (dme00061), TPM > 1 in RNAseq						Riboseq, CDS (TPM)				RNAseq (TPM)			Translational efficiency (CDS/RNA)
Transcript	Gene	CG Number	Transcript_ID	Gene_ID	Length (AA)	Length (bp)	CS (Whole heads)	nSyb-G4 (Neuron)	repo-G4 (glia)	CS (Whole heads)	nSyb-G4 (Neuron)	repo-G4 (glia)	CS (Whole heads)	nSyb-G4 (Neuron)	repo-G4 (glia)
ACC-RE	ACC	CG11198	FBtr0339123	FBgn0033246	2348	7046	155.466	26.4848	44.9287	22.1698	13.8776	24.9044	7.01251	1.90846	1.80405
CG12170-RA	CG12170	CG12170	FBtr0078709	FBgn0037356	438	1316	8.68967	10.2508	8.40674	8.68633	13.7118	11.2772	1.00038	0.747586	0.745463
CG16935-RB	CG16935	CG16935	FBtr0339954	FBgn0033883	357	1073	45.996	76.5976	55.9718	21.4395	34.4018	27.6264	2.14539	2.22656	2.02602
FASN1-RC	FASN1	CG3523	FBtr0335387	FBgn0283427	2540	7622	879.99	84.6265	192.862	47.8572	35.002	46.4785	18.3878	2.41776	4.14949
CG3603-RB	CG3603	CG3603	FBtr0332493	FBgn0029648	249	749	14.4643	3.33532	17.5138	5.12639	1.4299	7.65166	2.82153	2.33255	2.2889
CG3961-RE	CG3961	CG3961	FBtr0333712	FBgn0036821	666	2000	131.81	39.8456	82.3423	41.8936	26.8712	34.3454	3.14631	1.48284	2.39748
bgm-RC	bgm	CG4501	FBtr0346624	FBgn0027348	666	2000	108.939	6.37029	18.8075	25.1001	7.23991	25.3551	4.34019	0.879886	0.741765
beg-RA	beg	CG7842	FBtr0075278	FBgn0036691	379	1139	4.75581	11.4051	5.96664	5.61664	6.42725	5.88434	0.846735	1.77449	1.01399
Acsl-RI	Acsl	CG8732	FBtr0100431	FBgn0263120	707	2123	317.522	120.73	169.958	82.4105	44.0838	70.4597	3.85293	2.73866	2.41213

## Sheet: Fatty acid degradation
Fatty acid degradation (dme 00071), TPM > 1 in RNAseq						Riboseq, CDS (TPM)				RNAseq (TPM)			Translational efficiency (CDS/RNA)
Transcript	Gene	CG Number	Transcript_ID	Gene_ID	Length (AA)	Length (bp)	CS (Whole heads)	nSyb-G4 (Neuron)	repo-G4 (glia)	CS (Whole heads)	nSyb-G4 (Neuron)	repo-G4 (glia)	CS (Whole heads)	nSyb-G4 (Neuron)	repo-G4 (glia)
CG10932-RA	CG10932	CG10932	FBtr0071143	FBgn0029969	410	1232	74.7457	11.9636	32.9691	21.7679	3.71248	20.6048	3.43376	3.22253	1.60007
Mcad-RA	Mcad	CG12262	FBtr0076808	FBgn0035811	419	1259	286.356	42.6611	128.797	79.9667	15.3985	42.0638	3.58094	2.77047	3.06195
whd-RA	whd	CG12891	FBtr0088307	FBgn0261862	780	2342	177.067	25.0669	148.059	43.8825	12.6549	47.269	4.03503	1.98081	3.13227
Dci-RA	Dci	CG13890	FBtr0072587	FBgn0035169	262	788	14.5122	6.34049	24.4691	11.6541	9.61578	20.9818	1.24524	0.659384	1.16621
CG17544-RB	CG17544	CG17544	FBtr0081218	FBgn0032775	693	2081	16.1965	14.5255	29.8473	8.88642	9.68994	14.2713	1.82262	1.49903	2.09142
CPT2-RA	CPT2	CG2107	FBtr0072978	FBgn0035383	667	2003	23.4379	2.74385	15.7021	9.84778	1.74571	6.74267	2.38002	1.57177	2.32877
CG31075-RA	CG31075	CG31075	FBtr0085080	FBgn0051075	485	1457	34.2866	11.1448	15.2948	9.59497	4.17776	6.65186	3.57339	2.66766	2.29933
Adh-RE	Adh	CG3481	FBtr0100590	FBgn0000055	256	770	4698.53	1112.17	10712.3	1163.49	330.853	2157.48	4.03832	3.36151	4.96517
Aldh-RB	Aldh	CG3752	FBtr0332597	FBgn0012036	520	1562	871.215	147.938	445.708	200.541	36.5099	162.066	4.34431	4.052	2.75016
CG3902-RA	CG3902	CG3902	FBtr0075076	FBgn0036824	414	1244	154.823	38.7575	79.1504	61.7875	23.4347	52.2861	2.50573	1.65385	1.51379
CG3961-RE	CG3961	CG3961	FBtr0333712	FBgn0036821	666	2000	131.81	39.8456	82.3423	41.8936	26.8712	34.3454	3.14631	1.48284	2.39748
Mtpﾎｱ-RA	Mtpﾎｱ	CG4389	FBtr0079858	FBgn0028479	783	2351	145.668	19.0204	75.5612	33.6325	9.20264	43.5892	4.33118	2.06684	1.73348
bgm-RC	bgm	CG4501	FBtr0346624	FBgn0027348	666	2000	108.939	6.37029	18.8075	25.1001	7.23991	25.3551	4.34019	0.879886	0.741765
Mtpﾎｲ-RA	Mtpﾎｲ	CG4581	FBtr0072226	FBgn0025352	469	1409	152.925	29.9637	103.196	46.3379	16.429	54.3648	3.30021	1.82383	1.89821
CG4598-RA	CG4598	CG4598	FBtr0079877	FBgn0032160	281	845	64.8172	13.8951	53.6797	24.6126	4.85331	25.3842	2.63349	2.86301	2.11469
yip2-RA	yip2	CG4600	FBtr0079876	FBgn0040064	398	1196	201.296	31.958	146.418	50.1136	7.99648	50.4849	4.01679	3.99651	2.90023
Arc42-RA	Arc42	CG4703	FBtr0083817	FBgn0038742	405	1217	42.0372	5.95287	24.6745	13.0925	4.12742	15.3443	3.2108	1.44227	1.60805
CG4860-RA	CG4860	CG4860	FBtr0082623	FBgn0037999	415	1247	2.41329	1.202	2.40809	3.23621	3.04843	10.4873	0.745716	0.394302	0.229619
CG5009-RA	CG5009	CG5009	FBtr0089548	FBgn0027572	669	2009	65.0108	25.367	35.5585	15.4723	9.7625	12.9918	4.20176	2.59842	2.737
Echs1-RA	Echs1	CG6543	FBtr0087643	FBgn0033879	295	887	168.281	30.4172	90.6942	63.7265	18.3585	65.4278	2.64067	1.65685	1.38617
Fdh-RA	Fdh	CG6598	FBtr0082290	FBgn0011768	379	1139	88.7751	17.985	67.992	37.9862	13.0198	43.1529	2.33704	1.38136	1.57561
CG7461-RB	CG7461	CG7461	FBtr0300283	FBgn0034432	627	1883	160.457	20.431	90.8999	41.3142	10.7072	36.1025	3.88383	1.90816	2.51783
Acsl-RI	Acsl	CG8732	FBtr0100431	FBgn0263120	707	2123	317.522	120.73	169.958	82.4105	44.0838	70.4597	3.85293	2.73866	2.41213
CG9149-RA	CG9149	CG9149	FBtr0072667	FBgn0035203	392	1178	12.2623	9.96717	69.4976	6.09575	4.08812	18.1918	2.01161	2.43808	3.82028
CG9527-RD	CG9527	CG9527	FBtr0345720	FBgn0031813	703	2111	15.9663	10.4139	9.58312	14.2498	8.40615	9.347	1.12046	1.23884	1.02526
CG9547-RA	CG9547	CG9547	FBtr0079263	FBgn0031824	419	1259	8.12698	2.38108	15.4406	3.76025	1.13556	6.09945	2.16128	2.09684	2.53148
Aldh7A1-RA	Aldh7A1	CG9629	FBtr0075017	FBgn0036857	540	1622	31.912	3.54239	12.9594	9.097	2.35692	4.29581	3.50796	1.50298	3.01676
Acox57D-p-RB	Acox57D-p	CG9707	FBtr0342891	FBgn0034628	677	2033	22.5	2.33472	7.30762	9.60816	1.64395	5.94137	2.34176	1.42019	1.22996
